# Supplementary material
Source: PubMed Central journal article supplement (PMC7316527)
Supplement: NIHMS1597836-supplement-supplementary_appendix.pdf [file NIHMS1597836-supplement-supplementary_appendix.pdf]

# THE LANCET

## Supplementary appendix

This appendix formed part of the original submission and has been peer reviewed. We post it as supplied by the authors.

Supplement to: Drolet M, Bénard E, Pérez N, Brisson M, on behalf of the HPV Vaccination Impact Study Group. Population-level impact and herd effects following the introduction of human papillomavirus vaccination programmes: updated systematic review and meta-analysis. *Lancet* 2019; published online June 26. [http://dx.doi.org/10.1016/S0140-6736\(19\)30298-3](http://dx.doi.org/10.1016/S0140-6736(19)30298-3).

# Supplementary appendix

**Table S1. LIST OF AUTHORS, AFFILIATIONS, CONTRIBUTIONS, AND DECLARATION OF INTERESTS**

**HPV Vaccination Impact Study Group**

Prof Marie-Claude Boily PhD<sup>1,2,3</sup>; Hammad Ali PhD<sup>4</sup>; Prof Vincenzo Baldo MD<sup>5</sup>; Paul Brassard MD<sup>6</sup>; Julia ML Brotherton PhD<sup>7,8</sup>; Denton Callander PhD<sup>4</sup>; Marta Checchi MSc<sup>9</sup>; Eric PF Chow PhD<sup>10,11</sup>; Silvia Cocchio PhD<sup>5</sup>; Prof Tina Dalianis MD<sup>12</sup>; Shelley L Deeks MD<sup>13</sup>; Christian Dehendorf PhD<sup>14</sup>; Prof Basil Donovan MD<sup>4</sup>; Prof Christopher K Fairley PhD<sup>10,11</sup>; Elaine W Flagg PhD<sup>15</sup>; Julia W Gargano PhD<sup>16</sup>; Prof Suzanne M Garland MD<sup>17,18,19</sup>; Nathalie Grün PhD<sup>12</sup>; Bo T Hansen, PhD<sup>20</sup>; Christopher Harrison PhD<sup>21</sup>; Eva Herweijer, PhD<sup>22</sup>; Teresa M Imburgia, MPH<sup>23</sup>; Prof Anne M Johnson MD<sup>24</sup>; Prof Jessica A Kahn MD<sup>25</sup>; Kimberley Kavanagh PhD<sup>26</sup>; Prof Susanne K Kjaer MD<sup>27,28</sup>; Erich V Kliwer PhD<sup>29,30</sup>; Bette Liu DPhil<sup>31</sup>; Dorothy A Machalek PhD<sup>8,18,19</sup>; Lauri Markowitz MD<sup>16</sup>; David Mesher PhD<sup>9</sup>; Christian Munk MD<sup>27</sup>; Prof Linda Niccolai PhD<sup>32</sup>; Mari Nygård PhD<sup>20</sup>; Prof Gina Ogilvie MD<sup>33,34</sup>; Jeannie Oliphant MMSci<sup>35</sup>; Kevin G Pollock PhD<sup>36,37</sup>; M. Jesus Purriños-Hermida MD<sup>38</sup>; Megan A Smith PhD<sup>39,40</sup>; Marc Steben MD<sup>41</sup>; Anna Söderlund-Strand PhD<sup>42</sup>; Prof Pam Sonnenberg PhD<sup>24</sup>; Prof Pär Sparen PhD<sup>22</sup>; Clare Tanton PhD<sup>43</sup>; Prof Cosette M Wheeler PhD<sup>44</sup>; Petra J Woestenberg MSc<sup>45,46</sup>; Bo Nancy Yu MD<sup>29,47</sup>

1. Centre de recherche du CHU de Québec – Université Laval, Québec, Canada
2. Département de médecine sociale et préventive, Université Laval, Québec, Canada
3. Department of Infectious Disease Epidemiology, Imperial College, London, UK
4. The Kirby Institute, University of New South Wales, Sydney, Australia
5. Department of Cardiac, Thoracic and Vascular Sciences, Public Health Unit, University of Padua, Padua, Italy
6. Center for Clinical Epidemiology, Lady Davis Research Institute, Jewish General Hospital, Montreal, Canada
7. VCS Population Health, VCS Foundation, East Melbourne, Australia
8. School of Population and Global Health, The University of Melbourne, Victoria, Australia
9. National Infection Service, Public Health England, London, UK
10. Melbourne Sexual Health Centre, Alfred Health, Carlton, Victoria, Australia
11. Central Clinical School, Monash University, Melbourne, Victoria, Australia
12. Department of Oncology-Pathology, Karolinska Institutet, Bioclinicum, Karolinska University Hospital, Stockholm, Sweden
13. Communicable Diseases, Emergency Preparedness and Response, Public Health Ontario, Canada
14. Statistics and Pharmacoepidemiology, Danish Cancer Society Research Center, Copenhagen, Denmark
15. National Center for HIV/AIDS, Viral Hepatitis, STD, and TB Prevention, Centers for Disease Control and Prevention, Atlanta, Georgia, USA
16. National Center for Immunization and Respiratory Diseases, Centers for Disease Control and Prevention Atlanta, Georgia, USA
17. Department of Obstetrics and Gynaecology, University of Melbourne, Victoria, Australia
18. Molecular Microbiology, Murdoch Children’s Research Institute, Melbourne, Victoria, Australia
19. Centre for Women’s Infectious Diseases Research, The Royal Women’s Hospital, Melbourne, Victoria, Australia
20. Department of Research, Cancer Registry of Norway, Oslo, Norway
21. Menzies Centre for Health Policy, Sydney School of Public Health, University of Sydney, Australia
22. Department of Medical Epidemiology and Biostatistics, Karolinska Institutet, Stockholm, Sweden
23. Department of Pediatrics, Indiana University School of Medicine, Indianapolis, Indiana, USA
24. Institute for Global Health, University College London, London, UK
25. Cincinnati Children’s Hospital Medical Center and the University of Cincinnati College of Medicine, Cincinnati, Ohio, USA
26. Department of Mathematics and Statistics, University of Strathclyde, Glasgow, UK
27. Unit of Virus, Lifestyle and Genes, the Danish Cancer Society Research Center, Copenhagen, Denmark
28. Department of Gynecology, Rigshospital, University of Copenhagen, Denmark
29. Community Health Sciences, University of Manitoba, Winnipeg, Canada
30. Cancer Control Research, British Columbia Cancer Agency, Vancouver, Canada
31. School of Public Health and Community Medicine, UNSW, Sydney, Australia
32. Yale School of Public Health and Connecticut Emerging Infections Program, New Haven, Connecticut, USA
33. Faculty of Medicine, University of British Columbia, British Columbia, Canada
34. BC Women’s Hospital and Health Centre, Vancouver, British Columbia, Canada
35. Auckland Sexual Health Service, Auckland, New Zealand
36. Health Protection Scotland, Glasgow, UK
37. School of Health and Life Sciences, Glasgow Caledonian University, Glasgow, UK
38. Direcccion Xeral de Saude Publica, Conselleria de Sanidade, Xunta de Galicia, Santiago de Compostela, Spain

39. Cancer Research Division, Cancer Council NSW, Australia
40. Sydney School of Public Health, University of Sydney, Australia (additional affiliation at the time of work)
41. Sexually transmitted infections unit, Institut national de santé publique du Québec, Montréal, Canada
42. Department of Clinical Microbiology, Skåne University Hospital, Lund, Sweden
43. Department for Global Health and Development, London School of Hygiene and Tropical Medicine, London, UK
44. Departments of Pathology and Obstetrics and Gynecology, University of New Mexico Comprehensive Cancer Center, Albuquerque, USA
45. Center for Infectious Disease Control, National Institute for Public Health and the Environment (RIVM), Bilthoven, The Netherlands
46. Care and Public Health Research Institute (CAPHRI), Maastricht University Medical Center (MUMC+), Maastricht, The Netherlands
47. Epidemiology and Surveillance Manitoba Health, seniors and Active Living, Manitoba, Winnipeg, Canada

### **Contributors**

MC-B conceived the study and participated in the design of the meta-analysis. All other authors (HA, VB, PB, JMLB, DC, MC, EPFC, SC, TD, SLD, CD, BD, CKF, EWF, JWG, SMG, NG, BTH, CH, EH, TMI, AMJ, JAK, KK, SKK, EVK, BL, DAM, LM, DM, CM, LN, MN, GO, JO, KGP, MJPH, MAS, MSt, ASS, PSo, PSp, CT, CMW, PJW, BNY) provided data, after having done supplementary analyses for the purposes of this meta-analysis. All authors interpreted the results and critically revised the manuscript for scientific content. All authors approved the final version of the article.

### **Declaration of interests**

HA reports grants and non-financial support from CSL Biotherapies and grants from Australian Department of Health. VB reports grants, personal fees and non-financial support from MSD, GSK, Sanofi, and Seqirus. JMLB reports unrestricted investigator-initiated grants from MSD (papillomatosis typing study) and Seqirus (cervical cancer typing study), she has never received any personal financial benefits. DC reports grants from Australian Department of Health and Seqirus (CSL Limited), and grants from Australian Research Council, New South Wales Ministry of Health, Australian Department of Health, and National Health and Medical Research Council.

EPFC reports grants from Merck Sharp & Dohme, Seqirus, and other financial relationships with the National Health and Medical Research Council. SC reports grants and non-financial support from MSD, and non-financial support from Sanofi and Pfizer. BD reports grants from Australian Department of Health and Seqirus, and personal fees from Merck. CKF owns shares in CSL biotherapies. SMG reports grants from Commonwealth Department of Health Australia, CSL, GSK, Merck and personal fees from Merck (outside the submitted work and conducted in personal time). She is also a member of the Merck global advisory board for HPV vaccines.

BTH reports that his affiliated institution has received grants from MSD Norway. CH reports other funding outside of the submitted work through arm's length research agreements with the Australian Government Department of Health, AstraZeneca (Australia), Novartis Pharmaceuticals Australia, Seqirus (Australia), and with Sanofi-Aventis Australia. AMJ reports grants from MRC, Wellcome Trust, EPSRC, NIHR, and received personal fees from Wellcome Trust. SKK reports personal fees from Sanofi Pasteur MSD and Merck, and grants from Merck. EVK reports grants from Manitoba Health. BL reports grants from Australian NHMRC and other financial relationships from BioCSL. DAM reports grants from Australian Department of Health, National Health and Medical Research Council, and Seqirus, and honoraria (donated to her institute) from MSD. CM reports lecture fees and support for conference participation from Sanofi Pasteur MSD Denmark. LN reports grants from US Centers for Disease Control and Prevention, and personal fees from Merck. MN reports grants, through affiliating institute, from MSD Norway. JO reports grants from Seqirus. KGP reports financial relationships with Merck and personal fees from GSK. MSt reports grants from the Ministère de la Santé et des Services sociaux du Québec, grants and personal fees from Merck, Valeant, and Paladin. CT reports grants from the Medical Research Council and Wellcome Trust. CMW reports cooperative agreements, through University of New Mexico, from the National Institutes of Health related to HPV vaccine impact. MCB, PB, MC, TD, SLD, CD, EWF, JWG, NG, EH, TMI, JAK, KK, LM, DM, GO, MJPH, MAS, ASS, PSo, PSp, PJW, and BNY declare no competing interests.

**Table S2. PRISMA CHECKLIST**

| Section/topic                      | #  | Checklist item                                                                                                                                                                                                                                                                                              | Reported on page #       |
|------------------------------------|----|-------------------------------------------------------------------------------------------------------------------------------------------------------------------------------------------------------------------------------------------------------------------------------------------------------------|--------------------------|
| <b>TITLE</b>                       |    |                                                                                                                                                                                                                                                                                                             |                          |
| Title                              | 1  | Identify the report as a systematic review, meta-analysis, or both.                                                                                                                                                                                                                                         | 1                        |
| <b>ABSTRACT</b>                    |    |                                                                                                                                                                                                                                                                                                             |                          |
| Structured summary                 | 2  | Provide a structured summary including, as applicable: background; objectives; data sources; study eligibility criteria, participants, and interventions; study appraisal and synthesis methods; results; limitations; conclusions and implications of key findings; systematic review registration number. | 3                        |
| <b>INTRODUCTION</b>                |    |                                                                                                                                                                                                                                                                                                             |                          |
| Rationale                          | 3  | Describe the rationale for the review in the context of what is already known.                                                                                                                                                                                                                              | 4, 5                     |
| Objectives                         | 4  | Provide an explicit statement of questions being addressed with reference to participants, interventions, comparisons, outcomes, and study design (PICOS).                                                                                                                                                  | 5                        |
| <b>METHODS</b>                     |    |                                                                                                                                                                                                                                                                                                             |                          |
| Protocol and registration          | 5  | Indicate if a review protocol exists, if and where it can be accessed (e.g., Web address), and, if available, provide registration information including registration number.                                                                                                                               | No protocol              |
| Eligibility criteria               | 6  | Specify study characteristics (e.g., PICOS, length of follow-up) and report characteristics (e.g., years considered, language, publication status) used as criteria for eligibility, giving rationale.                                                                                                      | 5                        |
| Information sources                | 7  | Describe all information sources (e.g., databases with dates of coverage, contact with study authors to identify additional studies) in the search and date last searched.                                                                                                                                  | 5, 6                     |
| Search                             | 8  | Present full electronic search strategy for at least one database, including any limits used, such that it could be repeated.                                                                                                                                                                               | Appendix Table S2        |
| Study selection                    | 9  | State the process for selecting studies (i.e., screening, eligibility, included in systematic review, and, if applicable, included in the meta-analysis).                                                                                                                                                   | 5                        |
| Data collection process            | 10 | Describe method of data extraction from reports (e.g., piloted forms, independently, in duplicate) and any processes for obtaining and confirming data from investigators.                                                                                                                                  | 6                        |
| Data items                         | 11 | List and define all variables for which data were sought (e.g., PICOS, funding sources) and any assumptions and simplifications made.                                                                                                                                                                       | 6, Table 1               |
| Risk of bias in individual studies | 12 | Describe methods used for assessing risk of bias of individual studies (including specification of whether this was done at the study or outcome level), and how this information is to be used in any data synthesis.                                                                                      | 6, Appendix Tables S5-S7 |
| Summary measures                   | 13 | State the principal summary measures (e.g., risk ratio, difference in means).                                                                                                                                                                                                                               | 6                        |

|                               |    |                                                                                                                                                                                                          |                             |
|-------------------------------|----|----------------------------------------------------------------------------------------------------------------------------------------------------------------------------------------------------------|-----------------------------|
| Synthesis of results          | 14 | Describe the methods of handling data and combining results of studies, if done, including measures of consistency (e.g., $I^2$ ) for each meta-analysis.                                                | 6                           |
| Risk of bias across studies   | 15 | Specify any assessment of risk of bias that may affect the cumulative evidence (e.g., publication bias, selective reporting within studies).                                                             | Appendix, Tables S5-S7      |
| Additional analyses           | 16 | Describe methods of additional analyses (e.g., sensitivity or subgroup analyses, meta-regression), if done, indicating which were pre-specified.                                                         | 6                           |
| <b>RESULTS</b>                |    |                                                                                                                                                                                                          |                             |
| Study selection               | 17 | Give numbers of studies screened, assessed for eligibility, and included in the review, with reasons for exclusions at each stage, ideally with a flow diagram.                                          | 7, Figure 1                 |
| Study characteristics         | 18 | For each study, present characteristics for which data were extracted (e.g., study size, PICOS, follow-up period) and provide the citations.                                                             | 7, Table 1                  |
| Risk of bias within studies   | 19 | Present data on risk of bias of each study and, if available, any outcome level assessment (see item 12).                                                                                                | Appendix, Tables S5-S7      |
| Results of individual studies | 20 | For all outcomes considered (benefits or harms), present, for each study: (a) simple summary data for each intervention group (b) effect estimates and confidence intervals, ideally with a forest plot. | Appendix Figures S1-S3      |
| Synthesis of results          | 21 | Present results of each meta-analysis done, including confidence intervals and measures of consistency.                                                                                                  | Figures 2-6                 |
| Risk of bias across studies   | 22 | Present results of any assessment of risk of bias across studies (see Item 15).                                                                                                                          | 10, Appendix, Tables S5-S7  |
| Additional analysis           | 23 | Give results of additional analyses, if done (e.g., sensitivity or subgroup analyses, meta-regression [see Item 16]).                                                                                    | Appendix Tables S9-S11      |
| <b>DISCUSSION</b>             |    |                                                                                                                                                                                                          |                             |
| Summary of evidence           | 24 | Summarize the main findings including the strength of evidence for each main outcome; consider their relevance to key groups (e.g., healthcare providers, users, and policy makers).                     | 8,9                         |
| Limitations                   | 25 | Discuss limitations at study and outcome level (e.g., risk of bias), and at review-level (e.g., incomplete retrieval of identified research, reporting bias).                                            | 10                          |
| Conclusions                   | 26 | Provide a general interpretation of the results in the context of other evidence, and implications for future research.                                                                                  | 10                          |
| <b>FUNDING</b>                |    |                                                                                                                                                                                                          |                             |
| Funding                       | 27 | Describe sources of funding for the systematic review and other support (e.g., supply of data); role of funders for the systematic review.                                                               | 7,11, Appendix Tables S5-S7 |

From: Moher D, Liberati A, Tetzlaff J, Altman DG, The PRISMA Group (2009). Preferred Reporting Items for Systematic Reviews and Meta-Analyses: The PRISMA Statement. PLoS Med 6(7): e1000097. doi:10.1371/journal.pmed1000097

**Table S3. Full electronic search strategy for Pubmed/Medline**

("papillomavirus vaccines"[mesh] OR "HPV vaccine"[tiab] OR "HPV vaccination"[tiab] OR "papillomavirus vaccine"[tiab] OR "papillomavirus vaccination"[tiab])  
AND  
("program evaluation"[mesh] OR "immunization programs"[mesh] OR "program evaluation"[tiab] OR "population surveillance"[mesh] OR "population surveillance"[tiab] OR "sentinel surveillance"[mesh] OR "sentinel surveillance"[tiab] OR "incidence"[mesh] OR "incidence"[tiab] OR "prevalence"[mesh] OR "prevalence"[tiab] OR "rate"[tiab])  
AND  
("papillomavirus infections"[mesh] OR "papillomavirus infections"[tiab] OR "HPV"[tiab] OR "uterine cervical neoplasms"[mesh] OR "uterine cervical neoplasms"[tiab] OR "cervical intraepithelial neoplasia"[mesh] OR "cervical intraepithelial neoplasia"[tiab] OR "HPV related diseases"[tiab] OR "condylomata acuminata"[mesh] OR "condylomata acuminata"[tiab] OR "genital warts"[tiab])  
NOT  
("models, theoretical"[mesh] OR "HIV infections"[mesh] OR "cost-benefit analysis"[mesh] OR "health education"[mesh])

**Table S4. Methodological quality and risk of bias in studies examining changes in HPV infection between the pre- and post-vaccination periods.**

| Authors                                                                                                                 | Chow 2015a/2017                                                                                                                               | Cummings 2012                                                                                                      | Dillner 2018                                                                                                      | Dunne 2015                                                                                                                                                                                     | Grün 2016                                                                                                | Kahn 2012/2016                                                                                                                 |
|-------------------------------------------------------------------------------------------------------------------------|-----------------------------------------------------------------------------------------------------------------------------------------------|--------------------------------------------------------------------------------------------------------------------|-------------------------------------------------------------------------------------------------------------------|------------------------------------------------------------------------------------------------------------------------------------------------------------------------------------------------|----------------------------------------------------------------------------------------------------------|--------------------------------------------------------------------------------------------------------------------------------|
| <b>Study design</b>                                                                                                     | Time-trend analysis                                                                                                                           | Time-trend analysis                                                                                                | Time-trend analysis                                                                                               | Time-trend analysis                                                                                                                                                                            | Time-trend analysis                                                                                      | Time-trend analysis                                                                                                            |
| <b>Country</b>                                                                                                          | Australia                                                                                                                                     | USA                                                                                                                | Denmark, Norway, Sweden                                                                                           | USA                                                                                                                                                                                            | Sweden                                                                                                   | USA                                                                                                                            |
| <b>Funding</b>                                                                                                          | Australian National Health and Medical Research Council                                                                                       | National Institutes of Health                                                                                      | Merck & Co.                                                                                                       | Centers for Disease Control and Prevention                                                                                                                                                     | Swedish Research Council; Swedish Cancer Foundation; Stockholm Cancer Society; other foundations         | National Institutes of Health                                                                                                  |
| <b>Risk of selection bias</b>                                                                                           |                                                                                                                                               |                                                                                                                    |                                                                                                                   |                                                                                                                                                                                                |                                                                                                          |                                                                                                                                |
| Subjects included in the study                                                                                          | Clinic-based: Women and men aged $\leq 25$ yrs attending the Melbourne Sexual Health Center diagnosed with chlamydia                          | Clinic-based: Women attending 1 of 3 urban primary care clinics in Indianapolis                                    | Clinic-based: Women attending routine cervical screening in Denmark, Norway, Sweden                               | Clinic-based: Women undergoing cervical screening at Kaiser Permanente Northwest                                                                                                               | Clinic-based: Women aged 15-23 yrs advised on birth control and STD at a youth clinic in Stockholm       | Clinic-based: Women attending 3 primary care clinics in Cincinnati who had had sexual contact                                  |
| Potential for selection bias: Changes in the study population characteristics between pre- and post-vaccination periods | Medium/High<br>Possible changes in the clientele of the sexual health services between pre- and post-vaccination periods                      | Low<br>Unlikely changes in the clientele of primary care clinics between pre- and post-vaccination periods         | Medium<br>Possible changes in participants to cervical cancer screening between pre- and post-vaccination periods | Medium<br>Possible changes in participants to cervical cancer screening between pre- and post-vaccination periods                                                                              | Medium/High<br>Possible changes in the clientele of the clinic between pre- and post-vaccination periods | Low<br>Unlikely changes in the clientele of primary care clinics between pre- and post-vaccination periods                     |
| <b>Risk of information bias</b>                                                                                         |                                                                                                                                               |                                                                                                                    |                                                                                                                   |                                                                                                                                                                                                |                                                                                                          |                                                                                                                                |
| HPV testing                                                                                                             | Pap Type assay including PCR amplification and genotyping of 16 HPV types                                                                     | PCR Roche Linear Array test which detects 37 HPV types                                                             | Luminex system (Bio-Rad) with type-specific probes for 35 HPV types                                               | PCR Roche Linear Array test which detects 37 HPV types                                                                                                                                         | Luminex-based genotyping assay which detects 27 HPV types                                                | PCR Roche Linear Array test which detects 36 HPV types                                                                         |
| Performance of the HPV test                                                                                             | Unreported                                                                                                                                    | Unreported                                                                                                         | Unreported                                                                                                        | Unreported                                                                                                                                                                                     | Unreported                                                                                               | Unreported                                                                                                                     |
| Outcome used in original publication                                                                                    | HPV prevalence (crude) and HPV prevalence ratio (crude and adjusted)                                                                          | Odds ratios of HPV prevalence (crude)                                                                              | HPV prevalence difference (crude)                                                                                 | HPV prevalence ratio (crude and adjusted)                                                                                                                                                      | HPV prevalence (crude)                                                                                   | HPV prevalence difference (adjusted)                                                                                           |
| Potential for information bias: Errors in the identification of HPV+ during the pre and post-vaccination period         | Medium<br>Potential for masking by HPV-16/18, particularly in the pre-vaccine period                                                          | Medium<br>Potential for masking by HPV-16/18, particularly in the pre-vaccine period                               | Medium<br>Potential for masking by HPV-16/18, particularly in the pre-vaccine period                              | Medium<br>Potential for masking by HPV-16/18, particularly in the pre-vaccine period                                                                                                           | Medium<br>Potential for masking by HPV-16/18, particularly in the pre-vaccine period                     | Medium<br>Potential for masking by HPV-16/18, particularly in the pre-vaccine period                                           |
| <b>Risk of confounding</b>                                                                                              |                                                                                                                                               |                                                                                                                    |                                                                                                                   |                                                                                                                                                                                                |                                                                                                          |                                                                                                                                |
| Potential confounders considered                                                                                        | Analysis stratified by age and country of birth. Other analyses adjusted for number of sex partners, condom use and anatomical sampling site. | Analysis matched on age at enrollment, clinic site and reported sexual activity (yes, never) at time of enrollment | No adjustment in the analysis of change of HPV prevalence over time                                               | No adjustment in the analysis of changes of HPV prevalence over time. Other analysis adjusted for age at screening, age at 1 <sup>st</sup> dose, race, poverty, HIC, C. trachomatis, pregnancy | No adjustment in the analysis of changes of HPV prevalence over time                                     | Analysis adjusted for demographics (race, health insurance plan...), gynecologic history, sex activity using propensity scores |



|                                                                                                                                                  |                                                                                                                                                        |                                                                                                                                                                              |                                                                                                                                                       |                                                                                                                                                       |                                                                                                                                    |                                                                                                                                                                                                                              |
|--------------------------------------------------------------------------------------------------------------------------------------------------|--------------------------------------------------------------------------------------------------------------------------------------------------------|------------------------------------------------------------------------------------------------------------------------------------------------------------------------------|-------------------------------------------------------------------------------------------------------------------------------------------------------|-------------------------------------------------------------------------------------------------------------------------------------------------------|------------------------------------------------------------------------------------------------------------------------------------|------------------------------------------------------------------------------------------------------------------------------------------------------------------------------------------------------------------------------|
| Potential for confounding: Changes in HPV infection between the pre and post-vaccination periods could be diluted/exacerbated by other variables | Medium<br>Several risk factors considered. However, residual confounding by other factors associated with HPV vaccination and infection may be present | Medium<br>Few risk factors considered and residual confounding by other factors associated with HPV vaccination and infection is possible (e.g., changes in sexual activity) | Medium/High<br>Confounding by factors associated with HPV vaccination and infection is possible (e.g., changes in sexual activity)                    | Medium/high<br>Confounding by factors associated with HPV vaccination and infection is possible (e.g., changes in sexual activity)                    | Medium/High<br>Confounding by factors associated with HPV vaccination and infection is possible (e.g., changes in sexual activity) | Low/Medium<br>Several risk factors were considered. However, residual confounding by other factors associated with HPV vaccination and infection may be present                                                              |
| <b>External validity</b>                                                                                                                         |                                                                                                                                                        |                                                                                                                                                                              |                                                                                                                                                       |                                                                                                                                                       |                                                                                                                                    |                                                                                                                                                                                                                              |
| External validity: Results can be generalized to the population at the country/region level                                                      | Medium<br>Young men/women attending to urban primary care clinics may not represent the general population (e.g., different vaccination coverage)      | Medium<br>Young women attending to urban primary care clinics may not represent the general population (e.g., different vaccination coverage)                                | Medium<br>Women participating in cervical cancer screening may not be representative of the general population (e.g., different vaccination coverage) | Medium<br>Women participating in cervical cancer screening may not be representative of the general population (e.g., different vaccination coverage) | Medium<br>Young women attending the clinic may not represent the general population (e.g., different vaccination coverage)         | Low/Medium<br>Women attending the 3 primary care clinics may not be representative of the general population (e.g., different vaccination coverage). Minorities and women from low socio-economic status are overrepresented |

**Table S4: continued**

| <b>Authors</b>                                                                                                              | <b>Kavanagh 2014/<br/>Cameron 2016/<br/>Kavanagh 2017</b>                                                         | <b>Machalek 2018</b>                                                                                                                                                                                                                              | <b>Markowitz 2013/2016/<br/>Oliver 2017</b>                                                                  | <b>Mesher 2013/2016/2018</b>                                                                                                            | <b>Purriños-Hermida 2018</b>                                                                                                                                                                                                                                                                                                          | <b>Söderlun-Strand 2014</b>                                                                                 |
|-----------------------------------------------------------------------------------------------------------------------------|-------------------------------------------------------------------------------------------------------------------|---------------------------------------------------------------------------------------------------------------------------------------------------------------------------------------------------------------------------------------------------|--------------------------------------------------------------------------------------------------------------|-----------------------------------------------------------------------------------------------------------------------------------------|---------------------------------------------------------------------------------------------------------------------------------------------------------------------------------------------------------------------------------------------------------------------------------------------------------------------------------------|-------------------------------------------------------------------------------------------------------------|
| <b>Study design</b>                                                                                                         | <b>Time-trend analysis</b>                                                                                        | <b>Time-trend analysis</b>                                                                                                                                                                                                                        | <b>Time-trend analysis</b>                                                                                   | <b>Time-trend analysis</b>                                                                                                              | <b>Time-trend analysis</b>                                                                                                                                                                                                                                                                                                            | <b>Time-trend analysis</b>                                                                                  |
| <b>Country</b>                                                                                                              | <b>Scotland</b>                                                                                                   | <b>Australia</b>                                                                                                                                                                                                                                  | <b>USA</b>                                                                                                   | <b>England</b>                                                                                                                          | <b>Spain</b>                                                                                                                                                                                                                                                                                                                          | <b>Sweden</b>                                                                                               |
| <b>Funding</b>                                                                                                              | Scottish government                                                                                               | Australian Government<br>Department of Health HPV<br>Surveillance Fund                                                                                                                                                                            | Centers for Disease<br>Control and Prevention                                                                | Public Health England                                                                                                                   | Direccion xeral de Saude<br>Publica                                                                                                                                                                                                                                                                                                   | Public Health Agency of<br>Sweden                                                                           |
| <b>Risk of selection bias</b>                                                                                               |                                                                                                                   |                                                                                                                                                                                                                                                   |                                                                                                              |                                                                                                                                         |                                                                                                                                                                                                                                                                                                                                       |                                                                                                             |
| Subjects included in the study                                                                                              | Clinic-based: Women aged 20-24 yrs attending cervical screening across Scotland                                   | Clinic-based: Women recruited from participating family planning clinics for Pap screening in Victoria and New South Wales                                                                                                                        | Population-based: Participants in NHANES, designed to be nationally representative of the general population | Clinic-based: Women undergoing chlamydia screening at community sexual health services, general practice and youth clinics in 7 regions | Clinic-based: Post-vaccination: Women attending 7 health areas of the Galician public health; pre-vaccination: women attending 1/7 health areas                                                                                                                                                                                       | Clinic-based: Women undergoing chlamydia screening in the Skane region in Southern Sweden                   |
| Potential for selection bias: Changes in the study population characteristics between the pre- and post-vaccination periods | Medium<br>Possible changes in participants to cervical cancer screening between pre- and post-vaccination periods | Low<br>Unlikely changes in the clientele of family planning clinics between pre- and post-vaccination periods                                                                                                                                     | Low<br>Unlikely changes in the NHANES participants between pre- and post-vaccination periods                 | Medium<br>Documented changes in the clientele receiving chlamydia testing between pre- and post-vaccination periods                     | High<br>Potential differences between women attending 1 health service (pre-vaccination) compared to the 7 health services (post-vaccination). However, in the pre-vaccination period, there was no difference in sexual activity between women who participated in the study and a random sample of women from the 7 health services | Medium<br>Possible changes in participants to chlamydia screening between pre- and post-vaccination periods |
| <b>Risk of information bias</b>                                                                                             |                                                                                                                   |                                                                                                                                                                                                                                                   |                                                                                                              |                                                                                                                                         |                                                                                                                                                                                                                                                                                                                                       |                                                                                                             |
| HPV testing                                                                                                                 | Multimetrix HPV Assay which detects 18 high-risk types                                                            | 2005-2007: HPV+ Amplicor HPV test kit (Roche Molecular system-13 types), and PGMY09-PGMY11 PCR-ELISA Roche Linear Array genotyping test (37 types); 2015: HPV+ Cobas HPV test (Roche Diagnosis) and Roche Linear Array genotyping test (37 types) | PCR Roche Linear Array test which detects 37 different HPV types                                             | 2008: Hybrid Capture 2 and Roche Linear Array 2010-2013: HPV+ In-house multiplex PCR and Luminex-based genotyping test (20 HPV types)   | HPV+ Cobas 4800 HPV test with Linear Array HPV genotyping (Roche Diagnostic) (12 types)                                                                                                                                                                                                                                               | HPV + In-house multiplex PCR with genotyping by MALDI-TOF mass spectrometry (16 types)                      |
| Performance of the HPV test                                                                                                 | Unreported                                                                                                        | Unreported                                                                                                                                                                                                                                        | Unreported                                                                                                   | Unreported                                                                                                                              | Unreported                                                                                                                                                                                                                                                                                                                            | Unreported                                                                                                  |
| Outcome used in original publication                                                                                        | HPV prevalence over time (crude)                                                                                  | HPV prevalence ratio (crude and adjusted)                                                                                                                                                                                                         | HPV prevalence ratio (crude and adjusted)                                                                    | Odds ratios of HPV prevalence (adjusted)                                                                                                | HPV prevalence ratio (crude and adjusted)                                                                                                                                                                                                                                                                                             | HPV prevalence (crude)                                                                                      |

| <b>Authors</b>                                                                                                                                   | <b>Kavanagh 2014/<br/>Cameron 2016/<br/>Kavanagh 2017</b>                                                                          | <b>Machalek 2018</b>                                                                                                                                                                         | <b>Markowitz 2013/2016/<br/>Oliver 2017</b>                                                                                                                                                                           | <b>Meshor 2013/2016/2018</b>                                                                                                                                                                                                                            | <b>Purriños-Hermida 2018</b>                                                                                                                                                                            | <b>Söderlun-Strand 2014</b>                                                                                                                             |
|--------------------------------------------------------------------------------------------------------------------------------------------------|------------------------------------------------------------------------------------------------------------------------------------|----------------------------------------------------------------------------------------------------------------------------------------------------------------------------------------------|-----------------------------------------------------------------------------------------------------------------------------------------------------------------------------------------------------------------------|---------------------------------------------------------------------------------------------------------------------------------------------------------------------------------------------------------------------------------------------------------|---------------------------------------------------------------------------------------------------------------------------------------------------------------------------------------------------------|---------------------------------------------------------------------------------------------------------------------------------------------------------|
| <b>Study design</b>                                                                                                                              | <b>Time-trend analysis</b>                                                                                                         | <b>Time-trend analysis</b>                                                                                                                                                                   | <b>Time-trend analysis</b>                                                                                                                                                                                            | <b>Time-trend analysis</b>                                                                                                                                                                                                                              | <b>Time-trend analysis</b>                                                                                                                                                                              | <b>Time-trend analysis</b>                                                                                                                              |
| <b>Country</b>                                                                                                                                   | <b>Scotland</b>                                                                                                                    | <b>Australia</b>                                                                                                                                                                             | <b>USA</b>                                                                                                                                                                                                            | <b>England</b>                                                                                                                                                                                                                                          | <b>Spain</b>                                                                                                                                                                                            | <b>Sweden</b>                                                                                                                                           |
| Potential for information bias: Errors in the identification of HPV+ during the pre and post-vaccination period                                  | Medium<br>Potential for masking by HPV-16/18, particularly in the pre-vaccine period                                               | Medium<br>Potential for masking by HPV-16/18, particularly in the pre-vaccine period.<br>High concordance has been reported between AMP and Cobas                                            | Medium<br>Potential for masking by HPV-16/18, particularly in the pre-vaccine period;                                                                                                                                 | High<br>Potential for masking by HPV-16/18, particularly in the pre-vaccine period; different assays used in the pre- and post-vaccination periods, which may have contributed to higher prevalence of non-vaccine types in the post-vaccination period | Medium<br>Potential for masking by HPV-16/18, particularly in the pre-vaccine period                                                                                                                    | Medium<br>Potential for masking by HPV-16/18, particularly in the pre-vaccine period                                                                    |
| <b>Risk of confounding</b>                                                                                                                       |                                                                                                                                    |                                                                                                                                                                                              |                                                                                                                                                                                                                       |                                                                                                                                                                                                                                                         |                                                                                                                                                                                                         |                                                                                                                                                         |
| Potential confounders considered                                                                                                                 | No adjustment in the analysis of changes of HPV prevalence over time                                                               | Analysis stratified by age and adjusted for smoking. Confounding for a range of socio-demographic and behavioral characteristics was verified and there was no difference between the groups | Analyses adjusted for one or more of the following: race/ethnicity, number of lifetime sex partners, number of past year sex partners, poverty. All analyses weighted to present the general population               | Analysis adjusted for sexual history, age, venue type, ethnicity and chlamydia positivity                                                                                                                                                               | Analysis stratified by age and adjusted for age at first intercourse, number of sexual partners (lifetime, past year)                                                                                   | Analysis stratified by age                                                                                                                              |
| Potential for confounding: Changes in HPV infection between the pre and post-vaccination periods could be diluted/exacerbated by other variables | Medium/High<br>Confounding by factors associated with HPV vaccination and infection is possible (e.g., changes in sexual activity) | Medium<br>Few sexual behavior factors considered and residual confounding by other factors associated with HPV vaccination and infection is possible (e.g., changes in sexual activity)      | Low/Medium<br>Few factors considered, but weighted analysis to represent the general population                                                                                                                       | Medium<br>Several risk factors were considered. However, residual confounding by other factors associated with HPV vaccination and infection can be present (e.g., changes in sexual activity)                                                          | Low/Medium<br>Several risk factors were considered. Changes in sexual activity between pre- and post-vaccination periods were documented and adjusted for. However, residual confounding can be present | Medium/High<br>Confounding by other factors associated with HPV vaccination and infection is possible (e.g., changes in sexual activity)                |
| <b>External validity</b>                                                                                                                         |                                                                                                                                    |                                                                                                                                                                                              |                                                                                                                                                                                                                       |                                                                                                                                                                                                                                                         |                                                                                                                                                                                                         |                                                                                                                                                         |
| External validity: Results can be generalized to the population at the country/region level                                                      | Medium<br>Women participating in screening may not represent the general population (e.g., different vaccination coverage)         | Medium<br>Young women attending family planning clinics may not represent the general population (e.g., different vaccination coverage)                                                      | Medium/High<br>The survey was designed to be representative of the general population but non-participants could still be different than participants with respect to variables not considered in the sampling design | Medium<br>Chlamydia screening recommended for all sexually-active young women and uptake was 40% in 2011. However, women undergoing chlamydia screening may not be representative of the general population (e.g., different vaccination coverage)      | Medium<br>Women attending primary care center, gynecology department or family counseling center may not represent the general population                                                               | Medium<br>Women participating in chlamydia screening program may not be representative of the general population (e.g., different vaccination coverage) |

**Table S4: continued**

| <b>Authors</b>                                                                                                              | <b>Sonnenberg 2013</b>                                                                                                                                                                                                                                          | <b>Tabrizi 2012/2014</b>                                                                                                                |
|-----------------------------------------------------------------------------------------------------------------------------|-----------------------------------------------------------------------------------------------------------------------------------------------------------------------------------------------------------------------------------------------------------------|-----------------------------------------------------------------------------------------------------------------------------------------|
| <b>Study design</b>                                                                                                         | <b>Time-trend analysis</b>                                                                                                                                                                                                                                      | <b>Time-trend analysis</b>                                                                                                              |
| <b>Country</b>                                                                                                              | <b>Britain</b>                                                                                                                                                                                                                                                  | <b>Australia</b>                                                                                                                        |
| <b>Funding</b>                                                                                                              | UK Medical Research Council, Wellcome Trust, Economic and Social Research Council and the Department of Health                                                                                                                                                  | Australian National Health and Medical Research Council, and Anti- Cancer Council for Victoria                                          |
| <b>Risk of selection bias</b>                                                                                               |                                                                                                                                                                                                                                                                 |                                                                                                                                         |
| Subjects included in the study                                                                                              | Population-based: Participants in NATSAL, designed to be nationally representative of the British population                                                                                                                                                    | Clinic-based: Women recruited from participating family planning clinics for Pap screening in Sydney, Melbourne, and Perth              |
| Potential for selection bias: Changes in the study population characteristics between the pre- and post-vaccination periods | Low/Medium<br>Potential changes in the NATSAL participants between pre- and post-vaccination periods (> 10 yrs). Surveys weighted to Census data from the time.                                                                                                 | Low<br>Unlikely changes in the clientele of family planning clinics between pre- and post-vaccination periods                           |
| <b>Risk of information bias</b>                                                                                             |                                                                                                                                                                                                                                                                 |                                                                                                                                         |
| HPV testing                                                                                                                 | In-house Luminex-based genotyping assay (20 HPV types) in urine samples                                                                                                                                                                                         | HPV+ Amplicor HPV test kit (Roche Molecular system-13 types), and PGMY09-PGMY11 PCR-ELISA Roche Linear Array genotyping test (37 types) |
| Performance of the HPV test                                                                                                 | Unreported                                                                                                                                                                                                                                                      | Unreported                                                                                                                              |
| Outcome used in original publication                                                                                        | Odds ratios of HPV prevalence (adjusted)                                                                                                                                                                                                                        | Odds ratios of HPV prevalence (adjusted)                                                                                                |
| Potential for information bias: Errors in the identification of HPV+ during the pre and post-vaccination period             | High<br>Potential for masking by HPV-16/18, particularly in the pre-vaccine period; Urine is a suboptimum specimen for the detection of HPV; Differences in methods of sample collection, preparation and storage between the pre- and post-vaccination periods | Medium<br>Potential for masking by HPV-16/18, particularly in the pre-vaccine period                                                    |

| <b>Authors</b>      | <b>Sonnenberg 2013</b>     | <b>Tabrizi 2012/2014</b>   |
|---------------------|----------------------------|----------------------------|
| <b>Study design</b> | <b>Time-trend analysis</b> | <b>Time-trend analysis</b> |
| <b>Country</b>      | <b>Britain</b>             | <b>Australia</b>           |

| <b>Risk of confounding</b>                                                                                                                       |                                                                                                                                                                                                                                                                   |                                                                                                                                                                                         |
|--------------------------------------------------------------------------------------------------------------------------------------------------|-------------------------------------------------------------------------------------------------------------------------------------------------------------------------------------------------------------------------------------------------------------------|-----------------------------------------------------------------------------------------------------------------------------------------------------------------------------------------|
| Potential confounders considered                                                                                                                 | No adjustment in the comparison of HPV prevalence between the pre- and post-vaccination periods, but all analysis weighted to represent the British population                                                                                                    | Analysis adjusted for age, contraceptive use, region, socioeconomic group and smoking status (these variables differed significantly between the 3 groups of women)                     |
| Potential for confounding: Changes in HPV infection between the pre and post-vaccination periods could be diluted/exacerbated by other variables | Medium/High<br>No adjusted analysis of changes in HPV prevalence over time and likely changes over a 10-year period in factors associated with HPV vaccination and infection (e.g., changes in sexual activity documented when comparing NATSAL2-3 <sup>1</sup> ) | Medium<br>Few sexual behavior factors considered and residual confounding by other factors associated with HPV vaccination and infection is possible (e.g., changes in sexual activity) |

| <b>External validity</b>                                                                    |                                                                                                                                                                                                                                                                                                                          |                                                                                                                                         |
|---------------------------------------------------------------------------------------------|--------------------------------------------------------------------------------------------------------------------------------------------------------------------------------------------------------------------------------------------------------------------------------------------------------------------------|-----------------------------------------------------------------------------------------------------------------------------------------|
| External validity: Results can be generalized to the population at the country/region level | Medium/High<br>The survey was designed to be representative of the general population. However, participants and those providing urine samples might not be fully representative of the general population, despite adjustment for known biases and use of additional weights for urine selection and urine non-response | Medium<br>Young women attending family planning clinics may not represent the general population (e.g., different vaccination coverage) |

NATSAL: National Survey of Sexual Attitudes and Lifestyles; PCR: polymerase chain reaction; STD: Sexually transmitted diseases

#### **References:**

1. Mercer CH, Tanton C, Prah P, Erens B, Sonnenberg P, Clifton S, Macdowall W, Lewis R, Field N, Datta J, Copas AJ, Phelps A, Wellings K, Johnson AM. Changes in sexual attitudes and lifestyles in Britain through the life course and over time: findings from the National Surveys of Sexual Attitudes and Lifestyles (Natsal). *Lancet* 2013; **382**:1781-94

**Table S5. Methodological quality and risk of bias in studies examining changes in anogenital warts (AGW) diagnosis between the pre- and post-vaccination periods.**

| Authors                                                                                                                        | Ali 2013/Chow 2015b, Ali 2017, Callander 2016                                                                                                                                                         | Baandrup 2013/Bollerup 2016                                                                       | Bauer 2012                                                                                                                                | Cocchio 2017                                                                           | Dominiak-Felden 2015                                                                             | Flagg 2013/Flagg 2018                                                                                                                                                                                                                                              |
|--------------------------------------------------------------------------------------------------------------------------------|-------------------------------------------------------------------------------------------------------------------------------------------------------------------------------------------------------|---------------------------------------------------------------------------------------------------|-------------------------------------------------------------------------------------------------------------------------------------------|----------------------------------------------------------------------------------------|--------------------------------------------------------------------------------------------------|--------------------------------------------------------------------------------------------------------------------------------------------------------------------------------------------------------------------------------------------------------------------|
| Study design                                                                                                                   | Time-trend analysis                                                                                                                                                                                   | Time-trend analysis                                                                               | Time-trend analysis                                                                                                                       | Time-trend analysis                                                                    | Time-trend analysis                                                                              | Time-trend analysis                                                                                                                                                                                                                                                |
| Country                                                                                                                        | Australia                                                                                                                                                                                             | Denmark                                                                                           | USA                                                                                                                                       | Italy                                                                                  | Belgium                                                                                          | USA                                                                                                                                                                                                                                                                |
| Funding                                                                                                                        | CSL Biotherapies                                                                                                                                                                                      | Aragon Foundation, Aase and Ejnar Danielsen Foundation, Mermaid II Project                        | Centers for Disease Control and Prevention, California Department of Public Health                                                        | University grant                                                                       | Sanofi Pasteur MSD                                                                               | Centers for Disease Control and Prevention                                                                                                                                                                                                                         |
| <b>Risk of selection bias</b>                                                                                                  |                                                                                                                                                                                                       |                                                                                                   |                                                                                                                                           |                                                                                        |                                                                                                  |                                                                                                                                                                                                                                                                    |
| Subjects included in the study                                                                                                 | Clinic-based: New clients of 40 sexual health services across Australia (Australian born)                                                                                                             | Population-based: Denmark population from Statistics Denmark                                      | Health provider/ insurance-based: Clients of the California Family Planning access care & treatment (FPACT) program                       | Population-based: All residents of the Veneto region (Italy) between 2004-2015         | Health provider/ insurance-based: Clients of the National Union of Independent Sick Funds (MLOZ) | Health provider/insurance-based : Enrollees in approximately 100 private health insurance plans across US                                                                                                                                                          |
| Potential for of selection bias: Changes in the study population characteristics between the pre- and post-vaccination periods | Medium/High Possible changes in the clientele of the sexual health services in the pre- and post-vaccination periods (increasing annual number of clients and % of clients with chlamydia after 2006) | Low Entire population of Denmark                                                                  | Low Unlikely change in the FPACT (family planning program for low-income individuals) clientele between pre- and post-vaccination periods | Low Entire population of Veneto                                                        | Low Unlikely change in clients of MLOZ between pre and post-vaccination periods.                 | Low Unlikely change in enrollees of insurance plans between pre- and post-vaccination periods. No decrease in Pap or pelvic exam (opportunities to diagnose AGW) over time                                                                                         |
| <b>Risk of information bias</b>                                                                                                |                                                                                                                                                                                                       |                                                                                                   |                                                                                                                                           |                                                                                        |                                                                                                  |                                                                                                                                                                                                                                                                    |
| Data source                                                                                                                    | Medical records                                                                                                                                                                                       | National patient register (hospital or outpatient clinics) and the National Prescription Registry | FPACT database (clinical encounter claims data)                                                                                           | Hospital discharge records and Veneto Regional Authority's statistical office          | MLOZ database                                                                                    | Truven Health Analytics MarketScan Commercial Claims and Encounters Database                                                                                                                                                                                       |
| AGW case definition                                                                                                            | Clinical diagnosis                                                                                                                                                                                    | ICD-10 code A63.0 and/or prescription of Podophyllotoxin                                          | ICD-9 codes 078.10, 078.11 OR prescription of Imiquimod or Podophyllotoxin                                                                | ICD9-CM code 078.11 AND one the following ICD9-CM surgical codes (70,71, 58.3, 64, 49) | First prescription of imiquimod with a level of reimbursement specific for AGW                   | 1) ICD-9 codes 078.11 OR 2) ICD-9 code 078.1, 078.10, 078.19 <u>and</u> therapeutic procedure or diagnosis of benign anogenital neoplasm OR 3) $\geq 1$ prescription for AGW treatment <u>and</u> therapeutic procedure or diagnosis of benign anogenital neoplasm |
| Outcome used                                                                                                                   | Annual proportion of new clients diagnosed with AGW                                                                                                                                                   | Annual incidence rate of diagnosed AGW in the population                                          | Annual proportion of FPACT clients diagnosed with AGW                                                                                     | Annual hospitalization rate for AGW in the population                                  | Annual incidence rate of diagnosed AGW among MLOZ clients                                        | Annual proportion of insured individuals with diagnosed AGW                                                                                                                                                                                                        |

| <b>Authors</b>                                                                                                                                  | <b>Ali 2013/Chow 2015b, Ali 2017, Callander 2016</b>                                                                                                                                                     | <b>Baandrup 2013/Bollerup 2016</b>                                                                                                                                                              | <b>Bauer 2012</b>                                                                                                                                                                                 | <b>Cocchio 2017</b>                                                                                                                                                                                                                | <b>Dominiak-Felden 2015</b>                                                                                                                                                                                                                                           | <b>Flagg 2013/Flagg 2018</b>                                                                                                                                                                    |
|-------------------------------------------------------------------------------------------------------------------------------------------------|----------------------------------------------------------------------------------------------------------------------------------------------------------------------------------------------------------|-------------------------------------------------------------------------------------------------------------------------------------------------------------------------------------------------|---------------------------------------------------------------------------------------------------------------------------------------------------------------------------------------------------|------------------------------------------------------------------------------------------------------------------------------------------------------------------------------------------------------------------------------------|-----------------------------------------------------------------------------------------------------------------------------------------------------------------------------------------------------------------------------------------------------------------------|-------------------------------------------------------------------------------------------------------------------------------------------------------------------------------------------------|
| <b>Study design</b>                                                                                                                             | <b>Time-trend analysis</b>                                                                                                                                                                               | <b>Time-trend analysis</b>                                                                                                                                                                      | <b>Time-trend analysis</b>                                                                                                                                                                        | <b>Time-trend analysis</b>                                                                                                                                                                                                         | <b>Time-trend analysis</b>                                                                                                                                                                                                                                            | <b>Time-trend analysis</b>                                                                                                                                                                      |
| <b>Country</b>                                                                                                                                  | <b>Australia</b>                                                                                                                                                                                         | <b>Denmark</b>                                                                                                                                                                                  | <b>USA</b>                                                                                                                                                                                        | <b>Italy</b>                                                                                                                                                                                                                       | <b>Belgium</b>                                                                                                                                                                                                                                                        | <b>USA</b>                                                                                                                                                                                      |
| Numerator                                                                                                                                       | Number of newly diagnosed AGW cases per year                                                                                                                                                             | Number of newly diagnosed AGW cases each year (washout of 12 months)                                                                                                                            | Number of newly diagnosed cases after 2007 per year                                                                                                                                               | Number of hospitalization for AGW each year                                                                                                                                                                                        | Number of newly diagnosed AGW case per year                                                                                                                                                                                                                           | Number of patients with AGW diagnosis each year                                                                                                                                                 |
| Denominator                                                                                                                                     | Annual number of new patients                                                                                                                                                                            | Annual population estimates                                                                                                                                                                     | Annual number of clients registered in the FPACT                                                                                                                                                  | Annual population estimates                                                                                                                                                                                                        | Annual number of MLOZ clients                                                                                                                                                                                                                                         | Annual number of clients in health insurance plans                                                                                                                                              |
| Potential for information bias:<br>Errors in the identification of diagnosed AGW cases during the pre and post-vaccination period               | Low<br>AGW are directly diagnosed by physicians                                                                                                                                                          | Medium<br>Sensitivity/specificity of algorithm to correctly identify diagnosed AGW not specified, unlikely to change over time unless awareness is associated with likelihood of including code | Medium<br>Sensitivity/specificity of algorithm to correctly identify diagnosed AGW not specified, unlikely to change over time unless awareness is associated with likelihood of including code   | Medium<br>Sensitivity/specificity of algorithm to correctly identify diagnosed AGW not specified and AGW treated by GP not included, unlikely to change over time unless awareness is associated with likelihood of including code | Medium<br>Sensitivity/specificity of algorithm to correctly identify diagnosed AGW not specified, unlikely to change over time unless awareness is associated with likelihood of including AGW reimbursement code or there is a change in using imiquod for treatment | Medium<br>Sensitivity/specificity of algorithm to correctly identify diagnosed AGW not specified, unlikely to change over time unless awareness is associated with likelihood of including code |
| <b>Risk of confounding</b>                                                                                                                      |                                                                                                                                                                                                          |                                                                                                                                                                                                 |                                                                                                                                                                                                   |                                                                                                                                                                                                                                    |                                                                                                                                                                                                                                                                       |                                                                                                                                                                                                 |
| Potential confounders considered                                                                                                                | Analysis stratified by age, gender, sexual orientation and residential status                                                                                                                            | Analysis stratified by age and gender                                                                                                                                                           | Analysis stratified by age and gender                                                                                                                                                             | Analysis stratified by age, gender                                                                                                                                                                                                 | Analysis stratified by age, gender                                                                                                                                                                                                                                    | Analysis stratified by age, gender, region, and insurance plan type                                                                                                                             |
| Potential for confounding:<br>Changes in diagnosed AGW between pre and post-vaccination periods could be diluted/exacerbated by other variables | High<br>Other factors could potentially cause changes in AGW frequency over time (e.g., changes in sexual activity, health seeking behaviour); data suggest increasing % of clients with chlamydia >2007 | Medium<br>Other factors could potentially cause changes in AGW frequency over time (e.g., changes in sexual activity, health seeking behaviour)                                                 | Medium<br>Other factors could potentially cause changes in AGW frequency over time (e.g., changes in sexual activity)                                                                             | Medium<br>Other factors could potentially cause changes in hospital admission for AGW over time (e.g., health seeking behaviour, medical practice, increasing treatment of AGW outside the hospital)                               | Medium<br>Other factors could potentially cause changes in AGW frequency over time (e.g., changes in sexual activity)                                                                                                                                                 | Medium<br>Other factors could potentially cause changes in AGW frequency over time (e.g., changes in sexual activity, health seeking behaviour)                                                 |
| <b>External validity</b>                                                                                                                        |                                                                                                                                                                                                          |                                                                                                                                                                                                 |                                                                                                                                                                                                   |                                                                                                                                                                                                                                    |                                                                                                                                                                                                                                                                       |                                                                                                                                                                                                 |
| External validity:<br>Results can be generalized to the population at the country/region level                                                  | Medium<br>Clients of 40 sexual health clinics possibly representative of sexual health clinic clients in Australia, but may not represent the general population (e.g., different vaccination coverage)  | Medium/High<br>Entire population. Contains all cases of AGW admitted to hospital, in outpatient clinics or treated by GP                                                                        | Medium<br>FPACT is a program for low-income individuals and 87% of participants are females. Results could be different for medium/high-income individuals (e.g., different vaccination coverage) | Medium<br>Entire population, contains all cases of AGW admitted to hospital. Results can be extrapolated to AGW cases admitted to hospitals (small subset of all AGW) but may not be representative of all AGW cases               | Medium/High<br>MLOZ is one of the three biggest sick funds in Belgium. It represents about 18% of the Belgian population with more than 2 million affiliates.                                                                                                         | Medium/High<br>The Truven Health Analytics contains data from 100 health insurance plan throughout the USA (n=13 million in 2010). Results could be different for uninsured individuals         |

**Table S5: continued**

| <b>Authors</b>                                                                                                                 | <b>Guerra 2016</b>                                                                                                                                                                                                                          | <b>Harrison 2014</b>                                                                                                                                             | <b>Howell-Jones 2013/Canvin 2017</b>                                                                                                    | <b>Kliwer 2012/Thompson 2016</b>                                                                                                                                                                      | <b>Leval 2012/Herweijer 2018</b>                                                                                                                                 | <b>Liu 2014</b>                                                                                                |
|--------------------------------------------------------------------------------------------------------------------------------|---------------------------------------------------------------------------------------------------------------------------------------------------------------------------------------------------------------------------------------------|------------------------------------------------------------------------------------------------------------------------------------------------------------------|-----------------------------------------------------------------------------------------------------------------------------------------|-------------------------------------------------------------------------------------------------------------------------------------------------------------------------------------------------------|------------------------------------------------------------------------------------------------------------------------------------------------------------------|----------------------------------------------------------------------------------------------------------------|
| <b>Study design</b>                                                                                                            | <b>Time-trend analysis</b>                                                                                                                                                                                                                  | <b>Time-trend analysis</b>                                                                                                                                       | <b>Time-trend analysis</b>                                                                                                              | <b>Time-trend analysis</b>                                                                                                                                                                            | <b>Time-trend analysis</b>                                                                                                                                       | <b>Time-trend analysis</b>                                                                                     |
| <b>Country</b>                                                                                                                 | <b>Canada</b>                                                                                                                                                                                                                               | <b>Australia</b>                                                                                                                                                 | <b>England</b>                                                                                                                          | <b>Canada</b>                                                                                                                                                                                         | <b>Sweden</b>                                                                                                                                                    | <b>Australia</b>                                                                                               |
| <b>Funding</b>                                                                                                                 | Public Health Ontario                                                                                                                                                                                                                       | Australian Government, Institute of Health and Welfare, National Prescribing Service, Other companies*                                                           | Public Health England                                                                                                                   | Manitoba Health                                                                                                                                                                                       | National Research School in Health Care Sciences, Strategic Research Program (Karolinska Institutet), Erasmus Program, Swedish Foundation for Strategic Research | Australian National Health and Medical Research Council (NHMRC) and the Victorian Cytology Service             |
| <b>Risk of selection bias</b>                                                                                                  |                                                                                                                                                                                                                                             |                                                                                                                                                                  |                                                                                                                                         |                                                                                                                                                                                                       |                                                                                                                                                                  |                                                                                                                |
| Subjects included in the study                                                                                                 | Population-based: All Ontario residents aged 15-26 years old                                                                                                                                                                                | Clinic-based: Patients attending general practitioners                                                                                                           | Population-based : Patients diagnosed at Genitourinary medicines (GUM) and England population from national statistics                  | Population-based: Manitoba population from the population registry                                                                                                                                    | Population-based: Sweden population from Statistics Sweden                                                                                                       | Population-based: Women aged 18–39 years participating in an Australian-wide survey on reproductive health     |
| Potential for of selection bias: Changes in the study population characteristics between the pre- and post-vaccination periods | Low<br>Entire population of Ontario                                                                                                                                                                                                         | Low<br>Unlikely change in the general practitioners clientele between the pre- and post-vaccination periods                                                      | Low/Medium<br>Possible changes in GUM clientele in pre- and post-vaccination periods and documented changes in service provision of GUM | Low<br>Entire population of Manitoba                                                                                                                                                                  | Low<br>Entire population of Sweden                                                                                                                               | Medium<br>Possible changes in women participating in the pre- and post-vaccination periods                     |
| <b>Risk of information bias</b>                                                                                                |                                                                                                                                                                                                                                             |                                                                                                                                                                  |                                                                                                                                         |                                                                                                                                                                                                       |                                                                                                                                                                  |                                                                                                                |
| Data source                                                                                                                    | Ontario Health Insurance Program (OHIP) administrative database (outpatient visits) and Registered Persons Database                                                                                                                         | Data from the Bettering Evaluation and Care of Health (BEACH) program (records details from 100 consecutive encounters from 1000 randomly selected GPs annually) | Genitourinary Medicine Clinic Activity Dataset (GUMCAD) (diagnoses at GUM clinics nationally)                                           | Manitoba medical claims, hospital discharges, and Manitoba population registry                                                                                                                        | National patient register, Prescribed drug register                                                                                                              | Data from two population-based telephone surveys conducted 10 years apart in 2001 and 2011                     |
| Anogenital wart case definition                                                                                                | Combination of diagnosis and procedure codes: 099 only if billed with Z117; or, 079 only if billed with Z117; or, 629 only if billed with Z117; or, Z549; or, Z758; or, Z733, Z736, or Z769 only in females; or, Z767 or Z701 only in males | ICPC 2 codes Y76 for males and X91 for females                                                                                                                   | Clinical diagnosis                                                                                                                      | Treatments (1 of 14 tariff codes for AGW treatments) OR hospitalization for AGW with ICD-9 code 078.11 OR (078.1, 078.10, 078.19 and related procedure) OR (ICD-10 A630 OR B07 and related procedure) | ICD-10 code A63 OR prescription of Imiquimod or Podophyllotoxin                                                                                                  | Self-reported diagnosis of AGW (ever)                                                                          |
| Outcome used                                                                                                                   | Annual incidence rate of diagnosed AGW in the population                                                                                                                                                                                    | Annual management rate of AGW per 1000 encounters                                                                                                                | Annual incidence rate of GUM-diagnosed AGW in the population                                                                            | Annual incidence rate of diagnosed AGW in the population                                                                                                                                              | Annual incidence rate of diagnosed AGW in the population                                                                                                         | Proportion of women reporting ever having a diagnosis of AGW (weighted to represent the Australian population) |



| <b>Authors</b>                                                                                                                               | <b>Guerra 2016</b>                                                                                                                                                                                                                 | <b>Harrison 2014</b>                                                                                                                 | <b>Howell-Jones 2013/Canvin 2017</b>                                                                                                            | <b>Kliwer 2012/Thompson 2016</b>                                                                                                                                                                | <b>Leval 2012/Herweijer 2018</b>                                                                                                                                                                | <b>Liu 2014</b>                                                                                                                                                                  |
|----------------------------------------------------------------------------------------------------------------------------------------------|------------------------------------------------------------------------------------------------------------------------------------------------------------------------------------------------------------------------------------|--------------------------------------------------------------------------------------------------------------------------------------|-------------------------------------------------------------------------------------------------------------------------------------------------|-------------------------------------------------------------------------------------------------------------------------------------------------------------------------------------------------|-------------------------------------------------------------------------------------------------------------------------------------------------------------------------------------------------|----------------------------------------------------------------------------------------------------------------------------------------------------------------------------------|
| <b>Study design</b>                                                                                                                          | <b>Time-trend analysis</b>                                                                                                                                                                                                         | <b>Time-trend analysis</b>                                                                                                           | <b>Time-trend analysis</b>                                                                                                                      | <b>Time-trend analysis</b>                                                                                                                                                                      | <b>Time-trend analysis</b>                                                                                                                                                                      | <b>Time-trend analysis</b>                                                                                                                                                       |
| <b>Country</b>                                                                                                                               | <b>Canada</b>                                                                                                                                                                                                                      | <b>Australia</b>                                                                                                                     | <b>England</b>                                                                                                                                  | <b>Canada</b>                                                                                                                                                                                   | <b>Sweden</b>                                                                                                                                                                                   | <b>Australia</b>                                                                                                                                                                 |
| Numerator                                                                                                                                    | Number of newly diagnosed AGW cases per year (washout period of 12 months)                                                                                                                                                         | Number of AGW management per year                                                                                                    | Number of first diagnosed AGW cases since 2006, each year                                                                                       | Number of newly diagnosed AGW case each year (washout period of 12 months)                                                                                                                      | Number of newly diagnosed AGW cases each year, (washout period of 6 months)                                                                                                                     | Number of self-reported AGW cases in the pre (2001) and post (2011) vaccination periods                                                                                          |
| Denominator                                                                                                                                  | Annual population estimates                                                                                                                                                                                                        | Annual number of encounters                                                                                                          | Annual population estimates                                                                                                                     | Annual population estimates                                                                                                                                                                     | Annual population estimates                                                                                                                                                                     | Total number of women completing the survey in pre and post vaccination surveys                                                                                                  |
| Potential for information bias: Errors in the identification of diagnosed AGW cases during the pre and post-vaccination period               | Medium<br>Sensitivity/specificity of algorithm to correctly identify diagnosed AGW not specified and AGW treated by GP not included, unlikely to change over time unless awareness is associated with likelihood of including code | Low<br>AGW are directly diagnosed by physicians                                                                                      | Low<br>AGW are directly diagnosed by physicians in GUM clinics                                                                                  | Medium<br>Sensitivity/specificity of algorithm to correctly identify diagnosed AGW not specified, unlikely to change over time unless awareness is associated with likelihood of including code | Medium<br>Sensitivity/specificity of algorithm to correctly identify diagnosed AGW not specified, unlikely to change over time unless awareness is associated with likelihood of including code | High<br>AGW cases are self-reported ever                                                                                                                                         |
| <b>Risk of confounding</b>                                                                                                                   |                                                                                                                                                                                                                                    |                                                                                                                                      |                                                                                                                                                 |                                                                                                                                                                                                 |                                                                                                                                                                                                 |                                                                                                                                                                                  |
| Potential confounders considered                                                                                                             | Analysis stratified by age, gender and adjusted for Pap test for females                                                                                                                                                           | Analysis stratified by age and gender                                                                                                | Analysis of changes over time stratified by age and gender,                                                                                     | Analysis stratified by age and gender                                                                                                                                                           | Analysis stratified by age and gender                                                                                                                                                           | Analysis stratified by age,                                                                                                                                                      |
| Potential for confounding: Changes in diagnosed AGW between pre and post-vaccination periods could be diluted/exacerbated by other variables | Medium<br>Other factors could potentially cause changes in AGW frequency over time (e.g., changes in sexual activity)                                                                                                              | Medium<br>Other factors could potentially cause changes in AGW frequency over time (e.g., changes in sexual activity)                | Medium<br>Other factors could potentially cause changes in AGW frequency over time (e.g., changes in sexual activity, health seeking behaviour) | Medium<br>Other factors could potentially cause changes in AGW frequency over time (e.g., changes in sexual activity, health seeking behaviour)                                                 | Medium<br>Other factors could potentially cause changes in AGW frequency over time (e.g., changes in sexual activity); data suggest increasing sexual activity over time in Sweden              | Medium<br>Other factors could potentially cause changes in AGW frequency over time (e.g., changes in sexual activity)                                                            |
| <b>External validity</b>                                                                                                                     |                                                                                                                                                                                                                                    |                                                                                                                                      |                                                                                                                                                 |                                                                                                                                                                                                 |                                                                                                                                                                                                 |                                                                                                                                                                                  |
| External validity: Results can be generalized to the population at the country/region level                                                  | High<br>Entire population                                                                                                                                                                                                          | Medium/High<br>The Bettering Evaluation and Care of Health (BEACH) program contains data on all Australian general practice activity | Medium/High<br>About 95% of AGW diagnoses are made in GUM clinics (~85% sample of national data used)                                           | High<br>Entire population                                                                                                                                                                       | High<br>Entire population                                                                                                                                                                       | Medium<br>Survey designed to be representative of the general population. However, participants might not be fully representative of the general population, despite adjustments |

**Table S5: continued 2**

| <b>Authors</b>                                                                                                                 | <b>Mikolajczyk 2013/Thöne 2017</b>                                                                   | <b>Oliphant 2011/ 2017</b>                                                                                                                                          | <b>Smith 2015/2016</b>                                                                                                                                      | <b>Sonnenberg 2017</b>                                                                                                                                          | <b>Steben 2018</b>                                                                                                                                 | <b>Woestenberg 2017</b>                                                                                                                                                                                            |
|--------------------------------------------------------------------------------------------------------------------------------|------------------------------------------------------------------------------------------------------|---------------------------------------------------------------------------------------------------------------------------------------------------------------------|-------------------------------------------------------------------------------------------------------------------------------------------------------------|-----------------------------------------------------------------------------------------------------------------------------------------------------------------|----------------------------------------------------------------------------------------------------------------------------------------------------|--------------------------------------------------------------------------------------------------------------------------------------------------------------------------------------------------------------------|
| <b>Study design</b>                                                                                                            | <b>Time-trend analysis</b>                                                                           | <b>Time-trend analysis</b>                                                                                                                                          | <b>Time-trend analysis</b>                                                                                                                                  | <b>Time-trend analysis</b>                                                                                                                                      | <b>Time-trend analysis</b>                                                                                                                         | <b>Time-trend analysis</b>                                                                                                                                                                                         |
| <b>Country</b>                                                                                                                 | <b>Germany</b>                                                                                       | <b>New Zealand</b>                                                                                                                                                  | <b>Australia</b>                                                                                                                                            | <b>Britain</b>                                                                                                                                                  | <b>Canada</b>                                                                                                                                      | <b>Netherlands</b>                                                                                                                                                                                                 |
| <b>Funding</b>                                                                                                                 | Sanofi-Pasteur MSD                                                                                   | No funding required                                                                                                                                                 | Australian Government Department of Health, NSW Ministry of Health, Children’s Hospital at Westmead, National Health and Medical Research Council Australia | UK Medical Research Council, Wellcome Trust, Economic and Social Research Council and the Department of Health                                                  | Ministère de la santé et des services sociaux du Québec                                                                                            | Ministry of Health, Welfare and Sport                                                                                                                                                                              |
| <b>Risk of selection bias</b>                                                                                                  |                                                                                                      |                                                                                                                                                                     |                                                                                                                                                             |                                                                                                                                                                 |                                                                                                                                                    |                                                                                                                                                                                                                    |
| Subjects included in the study                                                                                                 | Health provider/insurance-based : Enrollees in 1 large health insurance company across Germany       | Clinic-based: New clients of 4 sexual health service in Auckland                                                                                                    | Population-based: All resident of Australia between 1999–2011                                                                                               | Population-based: Participants in NATSAL, designed to be nationally representative of the British population                                                    | Health provider/insurance-based : Individuals from the province of Quebec with public drug coverage (41% of the Quebec population)                 | Clinic-based: Clients aged 16-24 years attending STI clinics located throughout the Netherlands (data from PASSYON study)                                                                                          |
| Potential for of selection bias: Changes in the study population characteristics between the pre- and post-vaccination periods | Low<br>Unlikely change in enrollees of insurance plans between the pre- and post-vaccination periods | Medium/High<br>Possible changes in the clientele of the sexual health service as reflected by an increasing annual number of clients in the post-vaccination period | Low<br>Entire population of Australia                                                                                                                       | Low/Medium<br>Potential changes in the NATSAL participants between pre- and post-vaccination periods (> 10 yrs). Surveys weighted to Census data from the time. | Low<br>Analysis restricted to individuals continuously covered by the public drug insurance throughout the study                                   | High<br>Documented changes in the clientele of the sexual health services in pre- and post-vaccination periods (STI clinics are recently prioritizing high-risk people and AGW cases are not considered high-risk) |
| <b>Risk of information bias</b>                                                                                                |                                                                                                      |                                                                                                                                                                     |                                                                                                                                                             |                                                                                                                                                                 |                                                                                                                                                    |                                                                                                                                                                                                                    |
| Data source                                                                                                                    | German Pharmaco-epidemiological research database                                                    | Medical records (available in the sexual health clinic database)                                                                                                    | National Hospital Morbidity Database (NHMD) and the Australian Bureau of Statistics                                                                         | Self-reported                                                                                                                                                   | Provincial physician service claims and public drug insurance plan databases                                                                       | Data from the PASSYON (Papillomavirus Surveillance among STI clinic Youngsters in the Netherlands) study                                                                                                           |
| Anogenital wart case definition                                                                                                | ICD-10 code A63.0                                                                                    | Clinical diagnosis                                                                                                                                                  | Hospital admissions including the ICD-10-AM code A63.0                                                                                                      | Ever having a diagnosis of AGW (self-reported)                                                                                                                  | ICD-9 code 078.10R medical procedure specific to condyloma (05314, 06169) OR dispensation of podofilox/podophyllotoxin, imiquimod, or fluorouracil | Clinical diagnosis                                                                                                                                                                                                 |
| Outcome used                                                                                                                   | Annual incidence rate of diagnosed AGW among insured individuals                                     | Annual proportion of new clients diagnosed with AGW                                                                                                                 | Annual incidence rate of hospitalization for AGW in the population                                                                                          | Proportion of the population with 1+ lifetime partner who reported ever having a diagnosis of AGW pre- and post-vaccination                                     | Annual incidence of rate of diagnosed AGW among individual covered by the public drug insurance plan                                               | Proportion of STI clients diagnosed with AGW                                                                                                                                                                       |

| Authors                                                                                                                                         | Mikolajczyk 2013/Thöne 2017                                                                                                                                                                     | Oliphant 2011/ 2017                                                                                                         | Smith 2015/2016                                                                                                                                                                                                                    | Sonnenberg 2017                                                                                                                                                                                               | Steben 2018                                                                                                                                                                                     | Woestenberg 2017                                                                                                                                    |
|-------------------------------------------------------------------------------------------------------------------------------------------------|-------------------------------------------------------------------------------------------------------------------------------------------------------------------------------------------------|-----------------------------------------------------------------------------------------------------------------------------|------------------------------------------------------------------------------------------------------------------------------------------------------------------------------------------------------------------------------------|---------------------------------------------------------------------------------------------------------------------------------------------------------------------------------------------------------------|-------------------------------------------------------------------------------------------------------------------------------------------------------------------------------------------------|-----------------------------------------------------------------------------------------------------------------------------------------------------|
| Study design                                                                                                                                    | Time-trend analysis                                                                                                                                                                             | Time-trend analysis                                                                                                         | Time-trend analysis                                                                                                                                                                                                                | Time-trend analysis                                                                                                                                                                                           | Time-trend analysis                                                                                                                                                                             | Time-trend analysis                                                                                                                                 |
| Country                                                                                                                                         | Germany                                                                                                                                                                                         | New Zealand                                                                                                                 | Australia                                                                                                                                                                                                                          | Britain                                                                                                                                                                                                       | Canada                                                                                                                                                                                          | Netherlands                                                                                                                                         |
| Numerator                                                                                                                                       | Number of newly diagnosed case each year, (washout period of 12 months)                                                                                                                         | Number of newly diagnosed AGW cases between Jan 2007 – June 2013                                                            | Number of hospitalization involving AGW per year                                                                                                                                                                                   | Number of participants who reported ever having a diagnosis of AGW                                                                                                                                            | Number of newly diagnosed case each year (washout period of 12 months)                                                                                                                          | Number of diagnosed AGW cases in the pre (2009) and post (2011, 2013, 2015) vaccination periods                                                     |
| Denominator                                                                                                                                     | Total number of clients of 1 large insurance company each year                                                                                                                                  | Total number of new patients per year                                                                                       | Annual population estimates                                                                                                                                                                                                        | Number of NATSAL participants, weighted to be nationally representative of the British population                                                                                                             | Annual number of individuals covered by the public drug insurance plan                                                                                                                          | Total number of people participating in PASSYON                                                                                                     |
| Potential for information bias:<br>Errors in the identification of diagnosed AGW cases during the pre and post-vaccination period               | Medium<br>Sensitivity/specificity of algorithm to correctly identify diagnosed AGW not specified, unlikely to change over time unless awareness is associated with likelihood of including code | Low<br>AGW are directly diagnosed by physicians                                                                             | Medium<br>Sensitivity/specificity of algorithm to correctly identify diagnosed AGW not specified and AGW treated by GP not included, unlikely to change over time unless awareness is associated with likelihood of including code | High<br>Recall bias of ever having a diagnosis of AGW. Increased awareness of the population about AGW since the introduction of HPV vaccination could influence answers in the post-vaccination period       | Medium<br>Sensitivity/specificity of algorithm to correctly identify diagnosed AGW not specified, unlikely to change over time unless awareness is associated with likelihood of including code | Low<br>AGW are directly diagnosed by physicians in the clinics                                                                                      |
| <b>Risk of confounding</b>                                                                                                                      |                                                                                                                                                                                                 |                                                                                                                             |                                                                                                                                                                                                                                    |                                                                                                                                                                                                               |                                                                                                                                                                                                 |                                                                                                                                                     |
| Potential confounders considered                                                                                                                | Analysis stratified by age and gender                                                                                                                                                           | Analysis stratified by age and gender                                                                                       | Analysis stratified by age and gender. Sensitivity analysis excluded admissions related to cervical screening follow-up                                                                                                            | Analysis stratified by age and gender. All analysis weighted to represent the British population                                                                                                              | Analysis stratified by age and gender                                                                                                                                                           | Analysis stratified by age and gender, adjusted for ethnicity, education level and number of sex partners in the past 6 months                      |
| Potential for confounding:<br>Changes in diagnosed AGW between pre and post-vaccination periods could be diluted/exacerbated by other variables | Medium<br>Other factors could potentially cause changes in AGW frequency over time (e.g., changes in sexual activity, health seeking behaviour)                                                 | Medium<br>Other factors could potentially cause changes in AGW frequency over time (e.g., changes in sexual activity)       | Medium<br>Other factors could potentially cause changes in hospital admissions involving AGW over time (e.g., health seeking behaviour, medical practice, increasing treatment of AGW outside hospital)                            | Medium/High<br>Other factors could potentially cause changes in AGW frequency over a 10-year period (e.g., changes in sexual activity documented when comparing NATSAL2-3 <sup>1)</sup> )                     | Medium<br>Other factors could potentially cause changes in AGW frequency over time (e.g., changes in sexual activity)                                                                           | Low/Medium<br>Other factors could potentially cause changes in AGW frequency over time (e.g., changes in sexual activity, health seeking behaviour) |
| <b>External validity</b>                                                                                                                        |                                                                                                                                                                                                 |                                                                                                                             |                                                                                                                                                                                                                                    |                                                                                                                                                                                                               |                                                                                                                                                                                                 |                                                                                                                                                     |
| External validity:<br>Results can be generalized to the population at the country/region level                                                  | Medium/High<br>The insurance plan includes > 6million individuals, 8% of the German population. Results could be different in uninsured individuals                                             | Medium<br>Clients of 1 sexual health clinic may not represent the general population (e.g., different vaccination coverage) | Medium<br>Entire population, contains all cases of AGW admitted to hospital. Results can be extrapolated to AGW cases admitted to hospitals (small subset of AGW) but may not be representative of all AGW                         | Medium/High<br>The survey was designed to be representative of the general population. However, participants might not be fully representative of the general population, despite adjustment for known biases | Medium<br>The public drug insurance plan covers 41% of the Quebec population. Results could be different among individuals with private drug insurance                                          | Medium<br>Clients of sexual health clinics may possibly not represent the general population (e.g., different vaccination coverage)                 |

AGW: Anogenital warts; ICD: International Classification of Diseases

\* AstraZeneca, Janssen-Cilag, Merck, Sharpe and Dohme, Pfizer, Abbott, Sanofi-Aventis, Wyeth, Novartis, GSK, Roche Products, BioCSL, Bayer

**Table S6. Methodological quality and risk of bias in studies examining changes in high-grade lesions between the pre- and post-vaccination periods.**

| Authors                                                                                                                     | Baldur-Felskov 2014/2015                                                                                                                          | Benard 2017                                                                                                                                                        | Brotherton 2011/AIHW 2016/2018                                                                                        | Flagg 2016                                                                                                                                                                                                                | Gargano 2018                                                                                                                                                                                                                                                                                                 | Niccolai 2013/2017                                                                                                                                                                                                                         |
|-----------------------------------------------------------------------------------------------------------------------------|---------------------------------------------------------------------------------------------------------------------------------------------------|--------------------------------------------------------------------------------------------------------------------------------------------------------------------|-----------------------------------------------------------------------------------------------------------------------|---------------------------------------------------------------------------------------------------------------------------------------------------------------------------------------------------------------------------|--------------------------------------------------------------------------------------------------------------------------------------------------------------------------------------------------------------------------------------------------------------------------------------------------------------|--------------------------------------------------------------------------------------------------------------------------------------------------------------------------------------------------------------------------------------------|
| <b>Study design</b>                                                                                                         | <b>Time-trend analysis</b>                                                                                                                        | <b>Time-trend analysis</b>                                                                                                                                         | <b>Time-trend analysis</b>                                                                                            | <b>Time-trend analysis</b>                                                                                                                                                                                                | <b>Time-trend analysis</b>                                                                                                                                                                                                                                                                                   | <b>Time-trend analysis</b>                                                                                                                                                                                                                 |
| <b>Country</b>                                                                                                              | <b>Denmark</b>                                                                                                                                    | <b>United States</b>                                                                                                                                               | <b>Australia</b>                                                                                                      | <b>USA</b>                                                                                                                                                                                                                | <b>USA</b>                                                                                                                                                                                                                                                                                                   | <b>USA</b>                                                                                                                                                                                                                                 |
| <b>Funding</b>                                                                                                              | Mermaid project (MERMAID II)                                                                                                                      | National Institute of Allergy and Infectious Diseases                                                                                                              | Australian Institute of Health and Welfare                                                                            | Centers for Disease Control and Prevention                                                                                                                                                                                | Centers for Disease Control and Prevention                                                                                                                                                                                                                                                                   | Centers for Disease Control and Prevention                                                                                                                                                                                                 |
| <b>Risk of selection bias</b>                                                                                               |                                                                                                                                                   |                                                                                                                                                                    |                                                                                                                       |                                                                                                                                                                                                                           |                                                                                                                                                                                                                                                                                                              |                                                                                                                                                                                                                                            |
| Subjects included in analysis                                                                                               | Population-based: Girls/Women included in the Nationwide Danish Pathology Data Bank                                                               | Population-based: Girls/Women included in the New Mexico HPV Pap Registry                                                                                          | Population-based: Girls/Women participating in the National Cervical Screening Program of Australia                   | Health-provider/insurance-based : Girls/Women enrolled in 100 to 170 private health insurance plans across USA (MarketScan Commercial Claims and Encounters Database) and screened for cervical cancer in each given year | Population-based: Girls/Women with a confirmed high-grade lesion in HPV-IMPACT, a laboratory-based surveillance system (catchment areas from California, Connecticut, New York, Oregon, and Tennessee). Number of screened women in each area obtained from different sources (individual or aggregate data) | Population-based: Girls/Women with a confirmed high grade lesion in the Connecticut surveillance system. Numbers of screened women in Connecticut estimated from the Behavioral Risk Factor Surveillance System-BRFSS (self-reported data) |
| Potential for selection bias: Changes in the study population characteristics between the pre- and post-vaccination periods | Medium<br>Possible changes in participants to cervical cancer screening between the pre- and post-vaccination periods                             | Medium<br>Possible changes in participants to cervical cancer screening between the pre- and post-vaccination periods                                              | Medium<br>Possible changes in participants to cervical cancer screening between the pre- and post-vaccination periods | Medium<br>Possible changes in participants to cervical cancer screening between the pre- and post-vaccination periods. Potential changes in the characteristics of enrollees over time.                                   | Medium/High<br>Possible changes in participants to cervical cancer screening between the pre- and post-vaccination periods<br>Identification of women screened not directly available for all areas                                                                                                          | Medium/High<br>Possible changes in participants to cervical cancer screening between the pre- and post-vaccination periods.<br>Identification of women screened not directly available (estimated from self-reported data in the BRFSS)    |
| <b>Risk of information bias</b>                                                                                             |                                                                                                                                                   |                                                                                                                                                                    |                                                                                                                       |                                                                                                                                                                                                                           |                                                                                                                                                                                                                                                                                                              |                                                                                                                                                                                                                                            |
| Diagnosis of cervical lesions                                                                                               | The Bank contains information on all specimens from all Danish pathology departments, including cervical cytology and cervical biopsies and cones | The registry receives data from all cytological and HPVtesting and histopathologic findings ascertained as part of clinical cervical screening taken in New Mexico | The registry receives data from almost all cytology and cervical histopathology taken in Australia                    | Marketscan receives diagnosis codes for all medical experience of enrollees, including ICD-9_CM diagnosis codes for histologically detected CIN2 and CIN3                                                                 | The HPV-IMPACT surveillance system receives data from all histologically confirmed CIN2+ identified in local and commercial laboratories serving each catchment area                                                                                                                                         | The Connecticut statewide surveillance system receives data from all 34 pathology laboratories in Connecticut                                                                                                                              |
| Outcome used                                                                                                                | Annual incidence of high grade lesions among screened Girls/Women                                                                                 | Annual incidence of high grade lesions among screened Girls/Women                                                                                                  | Annual incidence of high grade lesions among screened Girls/Women                                                     | Annual prevalence of high grade lesions among screened Girls/Women                                                                                                                                                        | Annual incidence of high grade lesions among an estimated number of screened Girls/Women                                                                                                                                                                                                                     | Published rates included all women; these were recalculated for the meta-analysis: annual incidence of high grade lesions among an estimated number of screened Girls/Women (BRFSS)                                                        |

| <b>Authors</b>                                                                                                                               | <b>Baldur-Felskov 2014/2015</b>                                                                                                                                                                                                                                                                                  | <b>Benard 2017</b>                                                                                                                                                                                                                                                                                 | <b>Brotherton 2011/AIHW 2016/2018</b>                                                                                                                                                                                                                                                                                                                                                                      | <b>Flagg 2016</b>                                                                                                                                                                                                                                                                                  | <b>Gargano 2018</b>                                                                                                                                                                                                                                                                                                                         | <b>Nicolai 2013/2017</b>                                                                                                                                                                                                                                                                           |
|----------------------------------------------------------------------------------------------------------------------------------------------|------------------------------------------------------------------------------------------------------------------------------------------------------------------------------------------------------------------------------------------------------------------------------------------------------------------|----------------------------------------------------------------------------------------------------------------------------------------------------------------------------------------------------------------------------------------------------------------------------------------------------|------------------------------------------------------------------------------------------------------------------------------------------------------------------------------------------------------------------------------------------------------------------------------------------------------------------------------------------------------------------------------------------------------------|----------------------------------------------------------------------------------------------------------------------------------------------------------------------------------------------------------------------------------------------------------------------------------------------------|---------------------------------------------------------------------------------------------------------------------------------------------------------------------------------------------------------------------------------------------------------------------------------------------------------------------------------------------|----------------------------------------------------------------------------------------------------------------------------------------------------------------------------------------------------------------------------------------------------------------------------------------------------|
| <b>Study design</b>                                                                                                                          | <b>Time-trend analysis</b>                                                                                                                                                                                                                                                                                       | <b>Time-trend analysis</b>                                                                                                                                                                                                                                                                         | <b>Time-trend analysis</b>                                                                                                                                                                                                                                                                                                                                                                                 | <b>Time-trend analysis</b>                                                                                                                                                                                                                                                                         | <b>Time-trend analysis</b>                                                                                                                                                                                                                                                                                                                  | <b>Time-trend analysis</b>                                                                                                                                                                                                                                                                         |
| <b>Country</b>                                                                                                                               | <b>Denmark</b>                                                                                                                                                                                                                                                                                                   | <b>United States</b>                                                                                                                                                                                                                                                                               | <b>Australia</b>                                                                                                                                                                                                                                                                                                                                                                                           | <b>USA</b>                                                                                                                                                                                                                                                                                         | <b>USA</b>                                                                                                                                                                                                                                                                                                                                  | <b>USA</b>                                                                                                                                                                                                                                                                                         |
| Potential for information bias:<br>Errors in the identification of pre-cancerous cervical lesions during the pre and post-vaccination period | Medium/High<br>Performance of screening test may change after vaccination, but unlikely to change during the first years of the vaccination program. Better reporting of cervical lesions (mandatory reporting of results >2005). Change to LBC (better sensitivity vs conventional cytology (Appendix Table S2) | Medium/High<br>Performance of screening test may change after vaccination, but unlikely to change during the first years of the vaccination program. Increased use of HPV-testing could lead to higher CIN2+ detection (Appendix Table S2)                                                         | Medium<br>Performance of screening test may change after vaccination, but unlikely to change during the first years of the vaccination program                                                                                                                                                                                                                                                             | Medium/High<br>Performance of screening test may change after vaccination, but unlikely to change during the first years of the vaccination program. Increased use of HPV-testing could lead to higher CIN2+ detection (Appendix Table S2)                                                         | Medium/High<br>Performance of screening test may change after vaccination, but unlikely to change during the first years of the vaccination program. Increased use of HPV-testing could lead to higher CIN2+ detection. Recommended decreased referral for young women could lead to lower CIN2+ detection under age 25 (Appendix Table S2) | Medium/High<br>Performance of screening test may change after vaccination, but unlikely to change during the first years of the vaccination program. Increased use of HPV-testing could lead to higher CIN2+ detection (Appendix Table S2)                                                         |
| <b>Risk of confounding</b>                                                                                                                   |                                                                                                                                                                                                                                                                                                                  |                                                                                                                                                                                                                                                                                                    |                                                                                                                                                                                                                                                                                                                                                                                                            |                                                                                                                                                                                                                                                                                                    |                                                                                                                                                                                                                                                                                                                                             |                                                                                                                                                                                                                                                                                                    |
| Potential confounders considered                                                                                                             | Analysis stratified by age                                                                                                                                                                                                                                                                                       | Analysis stratified by age                                                                                                                                                                                                                                                                         | Analysis stratified by age                                                                                                                                                                                                                                                                                                                                                                                 | Analysis stratified by age                                                                                                                                                                                                                                                                         | Analysis stratified by age                                                                                                                                                                                                                                                                                                                  | Analysis stratified by age                                                                                                                                                                                                                                                                         |
| Potential for confounding: Changes in precancerous between pre and post-vaccination periods could be diluted/exacerbated by other variables  | Medium<br>Other factors could potentially cause changes in the incidence of precancerous cervical lesions (e.g., changes in screening and management guidelines, sexual activity)                                                                                                                                | High<br>Other factors could potentially cause changes in the incidence of precancerous cervical lesions (e.g., changes in screening and management guidelines, participation, sexual activity). Less frequent screening and older age at screening start documented in the USA (Appendix Table S2) | Medium<br>Other factors could potentially cause changes in the incidence of precancerous cervical lesions (e.g., changes in screening and management guidelines, sexual activity)                                                                                                                                                                                                                          | High<br>Other factors could potentially cause changes in the incidence of precancerous cervical lesions (e.g., changes in screening and management guidelines, participation, sexual activity). Less frequent screening and older age at screening start documented in the USA (Appendix Table S2) | High<br>Other factors could potentially cause changes in the incidence of precancerous cervical lesions (e.g., changes in screening and management guidelines, participation, sexual activity). Less frequent screening and older age at screening start documented in the USA (Appendix Table S2)                                          | High<br>Other factors could potentially cause changes in the incidence of precancerous cervical lesions (e.g., changes in screening and management guidelines, participation, sexual activity). Less frequent screening and older age at screening start documented in the USA (Appendix Table S2) |
| <b>External validity</b>                                                                                                                     |                                                                                                                                                                                                                                                                                                                  |                                                                                                                                                                                                                                                                                                    |                                                                                                                                                                                                                                                                                                                                                                                                            |                                                                                                                                                                                                                                                                                                    |                                                                                                                                                                                                                                                                                                                                             |                                                                                                                                                                                                                                                                                                    |
| Results can be generalized to the population at the country/region level                                                                     | High<br>Women participating in screening may not be representative of the general population (e.g., different vaccination coverage). However, the vaccination coverage is high in Denmark and the vaccination coverage of women screened most likely represent the general population coverage                   | Medium<br>Women participating in screening may not be representative of the general population (e.g., different vaccination coverage), particularly in the USA where the vaccination coverage is medium and variable. Women from New Mexico may not be representative of all USA women             | High<br>Women participating in screening may not be representative of the general population (e.g., different vaccination coverage as shown in a study from Victoria which found that vaccinated women were less likely to be screened <sup>1</sup> ). However, vaccination coverage is high in Australia and vaccination coverage of women screened most likely represent the general population coverage | Medium<br>Women participating in screening may not be representative of the general population (e.g., different vaccination coverage), particularly in the USA where the vaccination coverage is medium and variable. In addition, results could be different for uninsured individuals            | Medium<br>Women participating in screening may not be representative of the general population (e.g., different vaccination coverage), particularly in the USA where the vaccination coverage is medium and variable. Women from areas included in HPV-IMPACT may not be representative of all USA women                                    | Medium<br>Women participating in screening may not be representative of the general population (e.g., different vaccination coverage), particularly in the USA where the vaccination coverage is medium and variable. Women from Connecticut may not be representative of all USA women            |

**Table S6: Continued**

| <b>Authors</b>                                                                                                                            | <b>Nygård 2017 (via Liaw 2014)*</b>                                                                                                                                                                                                                 | <b>Ogilvie 2015</b>                                                                                                                            | <b>Pollock 2014</b>                                                                                                                            |
|-------------------------------------------------------------------------------------------------------------------------------------------|-----------------------------------------------------------------------------------------------------------------------------------------------------------------------------------------------------------------------------------------------------|------------------------------------------------------------------------------------------------------------------------------------------------|------------------------------------------------------------------------------------------------------------------------------------------------|
| <b>Study design</b>                                                                                                                       | <b>Time-trend analysis</b>                                                                                                                                                                                                                          | <b>Time-trend analysis</b>                                                                                                                     | <b>Time-trend analysis</b>                                                                                                                     |
| <b>Country</b>                                                                                                                            | <b>Norway</b>                                                                                                                                                                                                                                       | <b>Canada</b>                                                                                                                                  | <b>Scotland</b>                                                                                                                                |
| <b>Funding</b>                                                                                                                            | Governments and non-profit cancer societies.                                                                                                                                                                                                        | BC Centre for Disease Control Foundation for Public and Population Health                                                                      | Scottish Government and the CSO grant                                                                                                          |
| <b>Risk of selection bias</b>                                                                                                             |                                                                                                                                                                                                                                                     |                                                                                                                                                |                                                                                                                                                |
| Subjects included in analysis                                                                                                             | Clinic-based: All women participating in the Norwegian Cervical Cancer Screening Program                                                                                                                                                            | Clinic-based: Girls/Women participating in the BC Cancer Agency's population-based cervical cancer program                                     | Clinic-based : Women participating in the Scottish Cervical Screening Program                                                                  |
| Potential for selection bias: Changes in the study population characteristics between the pre- and post-vaccination periods               | Medium<br>Possible changes in participants to cervical cancer screening between the pre- and post-vaccination periods                                                                                                                               | Medium<br>Possible changes in participants to cervical cancer screening between the pre- and post-vaccination periods                          | Medium<br>Possible changes in participants to cervical cancer screening between the pre- and post-vaccination periods                          |
| <b>Risk of information bias</b>                                                                                                           |                                                                                                                                                                                                                                                     |                                                                                                                                                |                                                                                                                                                |
| Diagnosis of cervical lesions                                                                                                             | The Program registry of contains all cervical cancer screening results and diagnosis                                                                                                                                                                | The Program registry contains all Pap tests, cervical biopsies and disease outcomes in BC, Canada                                              | The Program registry contains all Pap tests, cervical biopsies and disease outcomes                                                            |
| Outcome used                                                                                                                              | Annual incidence of high grade lesions among screened Girls/Women                                                                                                                                                                                   | Annual incidence of high grade lesions among screened Girls/Women                                                                              | Annual incidence of high grade lesions among screened Girls/Women                                                                              |
| Potential for information bias: Errors in the identification of pre-cancerous cervical lesions during the pre and post-vaccination period | Medium/High<br>Performance of screening test may change after vaccination, but unlikely to change during the first years of the vaccination program. Gradual implementation of LBC (better sensitivity vs conventional cytology)(Appendix Table S2) | Medium<br>Performance of screening test may change after vaccination, but unlikely to change during the first years of the vaccination program | Medium<br>Performance of screening test may change after vaccination, but unlikely to change during the first years of the vaccination program |

| <b>Risk of confounding</b>                                                                                                                  |                                                                                                                                                                                                                                                        |                                                                                                                                                                                                                                                   |                                                                                                                                                                                                                                                                                                  |
|---------------------------------------------------------------------------------------------------------------------------------------------|--------------------------------------------------------------------------------------------------------------------------------------------------------------------------------------------------------------------------------------------------------|---------------------------------------------------------------------------------------------------------------------------------------------------------------------------------------------------------------------------------------------------|--------------------------------------------------------------------------------------------------------------------------------------------------------------------------------------------------------------------------------------------------------------------------------------------------|
| Potential confounders considered                                                                                                            | Analysis stratified by age                                                                                                                                                                                                                             | Analysis stratified by age                                                                                                                                                                                                                        | Analysis stratified by age                                                                                                                                                                                                                                                                       |
| Potential for confounding: Changes in precancerous between pre and post-vaccination periods could be diluted/exacerbated by other variables | High<br>Other factors could potentially cause changes in the incidence of precancerous cervical lesions (e.g., changes in screening guidelines, sexual activity). Older age at screening start documented in Norway (Appendix Table S2)                | High<br>Other factors could potentially cause changes in the incidence of precancerous cervical lesions (e.g., changes in screening guidelines, sexual activity). Older age at screening start documented in British Columbia (Appendix Table S2) | Medium<br>Other factors could potentially cause changes in the incidence of precancerous cervical lesions (e.g., changes in screening guidelines and/or participation, sexual activity)                                                                                                          |
| <b>External validity</b>                                                                                                                    |                                                                                                                                                                                                                                                        |                                                                                                                                                                                                                                                   |                                                                                                                                                                                                                                                                                                  |
| Results can be generalized to the population at the country/region level                                                                    | Medium/High<br>Women participating in screening may not be representative of the general population (e.g., different vaccination coverage), particularly in Norway where the vaccination coverage is relatively low among women eligible for screening | Medium/High<br>Women participating in screening may not be representative of the general population (e.g., different vaccination coverage)                                                                                                        | High<br>Women participating in screening may not be representative of the general population (e.g., different vaccination coverage). However, vaccination coverage among screened women is available in this study and is similar to age-specific vaccination coverage of the general population |

ICD: International Classification of Diseases; CIN: Cervical intraepithelial neoplasia AIHW: Australian Institute of Health and Welfare; BRFSS: Behavioral Risk Factor Surveillance System; LBC: Liquid-based cytology

\* CIN2+ data from Norway were identified in the article by Liaw et al 2014 and were provided by Mari Nygård (personal communication)

## REFERENCE

1. Budd Ac, Brotherton JM, Gertig DM, Chau T, Drennan KT, Saville M. Cervical screening rates for women vaccinated against human papillomavirus. *Med J Aus* 2014; 201(5):279-82.

**Table S7. Description of HPV vaccination programs and population-level vaccination coverage (1 / 2/ 3 doses) for each study country/region until 2015-2016 (date of the most recent data available in this systematic review).**

| Country           | Vaccine                   | Financing            | Availability of vaccine/<br>Program start | Program description*                                                                                                                                                                                                                                        | Vaccination coverage ≥1 dose / 2 doses / 3 doses (year)                                                                                                                                                                                                                                                                                                                |
|-------------------|---------------------------|----------------------|-------------------------------------------|-------------------------------------------------------------------------------------------------------------------------------------------------------------------------------------------------------------------------------------------------------------|------------------------------------------------------------------------------------------------------------------------------------------------------------------------------------------------------------------------------------------------------------------------------------------------------------------------------------------------------------------------|
| Australia         | Quadrivalent              | Public               | April 2007                                | <u>School-based program:</u> <ul style="list-style-type: none"> <li>Girls 12-13 yrs</li> <li>Boys 12-13 yrs since 02/2013</li> </ul>                                                                                                                        | <u>School-based program:</u> <ul style="list-style-type: none"> <li>Girls turning 15 yrs in 2015: 86%/84%/78% (2015)</li> <li>Boys turning 15 yrs in 2015: 78%/75%/67% (2015)</li> </ul>                                                                                                                                                                               |
|                   |                           |                      | July 2007                                 | <u>School-based catch-up:</u> <ul style="list-style-type: none"> <li>Girls 14-17 yrs (2007-2009)</li> <li>Boys 14-15 yrs (2013-2014)</li> </ul> <u>GP/Community catch-up:</u> <ul style="list-style-type: none"> <li>Women 18-26 yrs (2007-2009)</li> </ul> | <u>School-based catch-up:</u> <ul style="list-style-type: none"> <li>Girls 14-15 yrs: 84%/80%/74% (2009)</li> <li>Girls 16-17 yrs: 84%/80%/72% (2009)</li> <li>Boys 14-15 yrs: 76%/72%/65% (2014)</li> </ul> <u>GP/Community catch-up:</u> <ul style="list-style-type: none"> <li>Women 18-19 yrs: -/-/78% (2009)</li> <li>Women 20-26 yrs: -/-/56% (2009)‡</li> </ul> |
| Belgium           | Quadrivalent and Bivalent | Partially subsidized | November 2007                             | <u>Opportunistic vaccination:</u> <ul style="list-style-type: none"> <li>Girls 12-15 yrs</li> </ul>                                                                                                                                                         | <u>Opportunistic vaccination:</u> <ul style="list-style-type: none"> <li>Girls 12-14 yrs: -/-/43% (2008-2009)</li> </ul>                                                                                                                                                                                                                                               |
|                   |                           |                      | December 2008                             | <u>Opportunistic vaccination:</u> <ul style="list-style-type: none"> <li>Girls 12-18 yrs</li> </ul>                                                                                                                                                         | <ul style="list-style-type: none"> <li>Girls 17 yrs: 75%/-/66% (2008-2009)</li> </ul>                                                                                                                                                                                                                                                                                  |
|                   | Quadrivalent              | Public               | September 2010 (Flemish community)        | <u>School-based program:</u> <ul style="list-style-type: none"> <li>Girls 12-13 yrs</li> </ul>                                                                                                                                                              | <u>School-based program:</u> <ul style="list-style-type: none"> <li>Girls, by 14 yrs: 90%/-/87% (2012)</li> </ul>                                                                                                                                                                                                                                                      |
|                   | Bivalent                  |                      | September 2011 (French community)         | <u>School-based program:</u> <ul style="list-style-type: none"> <li>Girls 13-14 yrs</li> </ul>                                                                                                                                                              | <u>School-based program:</u> <ul style="list-style-type: none"> <li>Girls 13-14 yrs: -/-/29% (2013)</li> </ul>                                                                                                                                                                                                                                                         |
| Canada (Quebec)   | Quadrivalent              | Public               | 2008                                      | <u>School-based program</u> <ul style="list-style-type: none"> <li>Girls 9 yrs (2 doses)</li> </ul> <u>School-based catch-up:</u> <ul style="list-style-type: none"> <li>Girls 14 yrs (3 doses, 2008-2013)</li> </ul>                                       | <u>School-based program</u> <ul style="list-style-type: none"> <li>Girls 9 yrs -/78%/- (2012-2013)</li> </ul> <u>School-based catch-up:</u> <ul style="list-style-type: none"> <li>Girls 14 yrs: -/78% (2012-2013)</li> </ul>                                                                                                                                          |
| Canada (Ontario)  | Quadrivalent              | Public               | 2007/2008                                 | <u>School-based program:</u> <ul style="list-style-type: none"> <li>Girls Grade 8 (≈ 13-14 yrs)</li> </ul>                                                                                                                                                  | <u>School-based program:</u> <ul style="list-style-type: none"> <li>Girls 13-14 yrs: -/80% (2013)</li> </ul>                                                                                                                                                                                                                                                           |
| Canada (Manitoba) | Quadrivalent              | Private              | August 2006 (vaccine available privately) | <u>Private vaccination:</u> <ul style="list-style-type: none"> <li>Girls/women 9-26 yrs</li> </ul>                                                                                                                                                          | <u>Private vaccination:</u> <ul style="list-style-type: none"> <li>Girls/women 9-26 yrs: -/3% (2009)</li> </ul>                                                                                                                                                                                                                                                        |
|                   |                           | Public               | September 2008                            | <u>School-based program:</u> <ul style="list-style-type: none"> <li>Girls Grade 6 (≈ 11-12 yrs)</li> </ul>                                                                                                                                                  | <u>School-based program:</u> <ul style="list-style-type: none"> <li>Girls 11-12 yrs: -/70% (2011)</li> </ul>                                                                                                                                                                                                                                                           |



|                                 |                                                                 |         |                |                                                                                                                         |                                                                                                |                                                                              |
|---------------------------------|-----------------------------------------------------------------|---------|----------------|-------------------------------------------------------------------------------------------------------------------------|------------------------------------------------------------------------------------------------|------------------------------------------------------------------------------|
| Canada<br>(British<br>Columbia) | Quadrivalent                                                    | Public  | September 2008 | <u>School-based program:</u>                                                                                            | <u>School-based program:</u>                                                                   |                                                                              |
|                                 |                                                                 |         |                | <ul style="list-style-type: none"> <li>Girls Grade 6 (<math>\approx</math> 11-12 yrs)</li> </ul>                        | <ul style="list-style-type: none"> <li>Girls Grade 6: -/65%/- (2015)</li> </ul>                |                                                                              |
|                                 |                                                                 |         | September 2015 | <u>School-based catch-up:</u>                                                                                           | <u>School-based catch-up:</u>                                                                  |                                                                              |
|                                 |                                                                 |         |                | <ul style="list-style-type: none"> <li>Girls Grade 9 (14-15 yrs) (2008-2011)</li> </ul>                                 | <ul style="list-style-type: none"> <li>Girls Grade 9: -/62% (2011)</li> </ul>                  |                                                                              |
|                                 |                                                                 |         |                | Program for high-risk males up to 26 yrs                                                                                | NA                                                                                             |                                                                              |
| Denmark                         | Quadrivalent                                                    | Private | October 2006   | <u>Private vaccination:</u>                                                                                             | <u>Private vaccination:</u>                                                                    |                                                                              |
|                                 |                                                                 |         |                | <ul style="list-style-type: none"> <li>Girls and boys <math>\geq</math> 9 yrs</li> </ul>                                | <ul style="list-style-type: none"> <li>Girls 20-27 yrs: 46%/35%/2% (2012)</li> </ul>           |                                                                              |
|                                 |                                                                 |         | Public         | January 2009                                                                                                            | <u>GP Childhood vaccination program:</u>                                                       | <u>GP Childhood vaccination program:</u>                                     |
|                                 |                                                                 |         |                |                                                                                                                         | <ul style="list-style-type: none"> <li>Girls 12 yrs</li> </ul>                                 | <ul style="list-style-type: none"> <li>Girls 12 yrs: -/90% (2012)</li> </ul> |
|                                 |                                                                 |         | October 2008   | <u>GP Catch-up girls:</u>                                                                                               | <u>Catch-up:</u>                                                                               |                                                                              |
|                                 |                                                                 |         |                | <ul style="list-style-type: none"> <li>Girls 13-15 yrs (2008-2010)</li> </ul>                                           | <ul style="list-style-type: none"> <li>Girls 13-15 yrs: 87-90%/83-86%/74-82% (2012)</li> </ul> |                                                                              |
|                                 |                                                                 |         | August 2012    | <u>GP Catch-up women:</u>                                                                                               | <u>GP Catch-up women:</u>                                                                      |                                                                              |
|                                 |                                                                 |         |                | <ul style="list-style-type: none"> <li>Women 20-27 yrs (2012-2013)</li> </ul>                                           | <ul style="list-style-type: none"> <li>Women 20-27 yrs: -/75% (2013)</li> </ul>                |                                                                              |
| Germany                         | Quadrivalent<br>and Bivalent<br>(Quadrivalent:<br>90% of doses) | Public  | March 2007     | <u>GP/community program</u>                                                                                             | <u>GP/community program</u>                                                                    |                                                                              |
|                                 |                                                                 |         |                | <ul style="list-style-type: none"> <li>Girls 12-17 yrs</li> </ul>                                                       | Girls 12-18: 6-48%/- (2012)                                                                    |                                                                              |
| Italy<br>(Veneto)               | Quadrivalent                                                    | Public  | 2008           | <u>Public health department program</u>                                                                                 | <u>Public health department program</u>                                                        |                                                                              |
|                                 |                                                                 |         |                | <ul style="list-style-type: none"> <li>Girls 12 yrs</li> </ul>                                                          | <ul style="list-style-type: none"> <li>Girls 12 yrs: 67-76%/-/ 56-72% (2017)</li> </ul>        |                                                                              |
| Netherlands                     | Bivalent                                                        | Public  | 2010           | <u>Public health department program:</u>                                                                                | <u>Public Health department Program:</u>                                                       |                                                                              |
|                                 |                                                                 |         |                | <ul style="list-style-type: none"> <li>Girls 12 yrs</li> </ul>                                                          | <ul style="list-style-type: none"> <li>Girls 13 yrs: -/61% (2016)</li> </ul>                   |                                                                              |
|                                 |                                                                 |         | 2009           | <u>Public health department catch-up:</u>                                                                               | <u>Public health department Catch-up:</u>                                                      |                                                                              |
|                                 |                                                                 |         |                | <ul style="list-style-type: none"> <li>Girls 12-16 yrs (2009)</li> </ul>                                                | <ul style="list-style-type: none"> <li>Girls 12-16 yrs: -/52%</li> </ul>                       |                                                                              |
| New Zealand                     | Quadrivalent                                                    | Public  | September 2008 | <u>School-based/GP/community program:</u>                                                                               | <u>School-based/GP/community program:</u>                                                      |                                                                              |
|                                 |                                                                 |         |                | <ul style="list-style-type: none"> <li>Girls 11-12 yrs (since 2009)</li> </ul>                                          | <ul style="list-style-type: none"> <li>Girls 11-12 yrs: -/66% (2013)</li> </ul>                |                                                                              |
|                                 |                                                                 |         |                | <u>School-based/GP/community catch-up:</u>                                                                              | <u>School-based/GP/community catch-up:</u>                                                     |                                                                              |
|                                 |                                                                 |         |                | <ul style="list-style-type: none"> <li>Females 18-19 yrs (since 2008)</li> <li>Females 13-17 yrs (2009-2016)</li> </ul> | <ul style="list-style-type: none"> <li>Girls 13-20 yrs (2008-2010): -/50% (2012)</li> </ul>    |                                                                              |
| Norway                          | Quadrivalent                                                    | Private | 2007           | NA                                                                                                                      | NA                                                                                             |                                                                              |
|                                 |                                                                 | Public  | August 2009    | <u>School-based program:</u>                                                                                            | <u>School-based program:</u>                                                                   |                                                                              |
|                                 |                                                                 |         |                | <ul style="list-style-type: none"> <li>Girls 12 yrs</li> </ul>                                                          | <ul style="list-style-type: none"> <li>Girls 12 yrs: 70-83%/-/68-76% (2013)</li> </ul>         |                                                                              |
| Spain<br>(Galicia)              | Bivalent                                                        | Public  | End 2008       | <u>Primary care providers vaccination:</u>                                                                              | <u>Primary care providers vaccination:</u>                                                     |                                                                              |
|                                 |                                                                 |         |                | <ul style="list-style-type: none"> <li>Girls 14 yrs</li> </ul>                                                          | <ul style="list-style-type: none"> <li>Girls 14 yrs: -/72% (2013)</li> </ul>                   |                                                                              |

|              |                                                      |                           |                                          |                                                                                                                                                                                                                                                                                                              |                                                                                                                                                                                                                                                                                                            |
|--------------|------------------------------------------------------|---------------------------|------------------------------------------|--------------------------------------------------------------------------------------------------------------------------------------------------------------------------------------------------------------------------------------------------------------------------------------------------------------|------------------------------------------------------------------------------------------------------------------------------------------------------------------------------------------------------------------------------------------------------------------------------------------------------------|
| Sweden       | Quadrivalent                                         | Partially subsidized      | October 2006 (Opportunistic vaccination) | <u>Opportunistic vaccination:</u> <ul style="list-style-type: none"> <li>Girls 13-20 yrs</li> </ul>                                                                                                                                                                                                          | <u>Opportunistic vaccination:</u> <ul style="list-style-type: none"> <li>Girls 13-20 yrs: -/25-30% (2006-2011)</li> </ul>                                                                                                                                                                                  |
|              |                                                      | Public                    | 2012                                     | <u>School-based program:</u> <ul style="list-style-type: none"> <li>Girls 10-12 yrs;</li> </ul> <u>School-based catch-up:</u> <ul style="list-style-type: none"> <li>Girls 13-18 yrs</li> </ul>                                                                                                              | <u>School-based program:</u> <ul style="list-style-type: none"> <li>Girls 10-12yrs: 80%/75%/- (2016)</li> </ul> <u>School-based catch-up:</u> <ul style="list-style-type: none"> <li>Girls 13-18 yrs: -/60% (2013)</li> </ul>                                                                              |
| UK - England | Bivalent, switch to Quadrivalent from September 2012 | Public                    | September 2008                           | <u>School-based program:</u> <ul style="list-style-type: none"> <li>Girls 12-13 yrs</li> </ul> <u>School-based/GP catch-up:</u> <ul style="list-style-type: none"> <li>Girls 14-17 yrs</li> </ul>                                                                                                            | <u>School-based program:</u> <ul style="list-style-type: none"> <li>Girls 12-13 yrs: 91%/90%/88% (2013/14)</li> </ul> <u>Catch-up:</u> <ul style="list-style-type: none"> <li>Girls 14-17 yrs: -/56% (range from 39 to 76%) (2011)</li> </ul>                                                              |
| UK- Scotland | Bivalent, switch to Quadrivalent in September 2012   | Public                    | September 2008                           | <u>School-based program:</u> <ul style="list-style-type: none"> <li>Girls 12-13 yrs</li> </ul> <u>School-based/GP catch-up:</u> <ul style="list-style-type: none"> <li>Girls 14-17 yrs (2008-2011)</li> </ul>                                                                                                | <u>School-based program:</u> <ul style="list-style-type: none"> <li>Girls 12-13 yrs: -/90% (2011)</li> <li>Girls 12-13 yrs: 91%/- (2014/15)</li> </ul> <u>Catch-up ( in and out of school):</u> <ul style="list-style-type: none"> <li>Girls 13-17 yrs: -/88% (33% among school leavers) (2011)</li> </ul> |
| USA          | Quadrivalent and Bivalent (mostly Quadrivalent)      | Mix of public and private | June 2006                                | <u>Primary care providers vaccination:</u> <ul style="list-style-type: none"> <li>Girls/women 11-12 yrs routine and 13-26 yrs, if not previously vaccinated</li> <li>Boys/men 11-12 yrs routine and 13-21 yrs if not previously vaccinated since 2011</li> <li>MSM 22-26 yrs or immunocompromised</li> </ul> | <u>Routine and catch-up vaccination:</u> <ul style="list-style-type: none"> <li>Girls 13-17 yrs: 60%/50%/40% (2014)</li> <li>Boys 13-17 yrs: 42%/31%/22% (2014)</li> <li>Women 19-26 yrs: 42% at least one dose, ever (2015)</li> <li>Men 19-26 yrs:10% at least one dose, ever (2015)</li> </ul>          |

\* The main delivery method is stated where different methods were allowed

\* Possible underreporting of HPV vaccination coverage for women 20-26 years old as reported in Brotherton et al. Vaccine 2014

## REFERENCES

### Australia

1. Ali H, Donovan B, Wand H, et al. Genital warts in young Australians five years into national human papillomavirus vaccination program: national surveillance data. *BMJ* 2013; **346**: f2032.
2. Australian Government Department of Health. Information about the national Human papillomavirus (HPV) Vaccination Program funded under the Immunise Australia Program. <http://www.health.gov.au/internet/immunise/publishing.nsf/content/immunise-hpv/>. (accessed April 14, 2014).
3. Brotherton JM, Liu B, Donovan B, Kaldor JM, Saville M. Human papillomavirus (HPV) vaccination coverage in young Australian women is higher than previously estimated: independent estimates from a nationally representative mobile phone survey. *Vaccine* 2014; **32**(5): 592-7.
4. National HPV Vaccination Program Register. Coverage Data. HPV vaccination coverage by dose number (Australia) for adolescents by age group. <http://www.hpvregister.org.au/research/coverage-data>. (accessed May 10, 2017).

### Belgium

1. Arbyn M, Broeck DV, Benoy I, et al. Surveillance of effects of HPV vaccination in Belgium. *Cancer Epidemiol.* 2016; **41**:152-8.
2. Arbyn M, de Sanjose S, Saraiya M, et al. EUROGIN 2011 roadmap on prevention and treatment of HPV-related disease. *Int J Cancer.* 2012; **131**(9):1969-82.

3. Merckx M, Broeck DV, Benoy I, Depuydt C, Weyers S, Arbyn M. Early effects of human papillomavirus vaccination in Belgium. *Eur J Cancer Prev.* 2015; **24**(4):340-2.
4. Lefevere E, Theeten H, Hens N, De Smet F, Top G, Van Damme P. From non-school-based, co-payment to school-based, free Human Papillomavirus vaccination in Flanders (Belgium): a retrospective cohort study describing vaccination coverage, age-specific coverage and socio-economic inequalities. *Vaccine.* 2015; **33**(39):5188-95.

#### Canada

1. Ontario Agency for Health Protection and Promotion (Public Health Ontario). Immunization coverage report for school pupils: 2012–13 school year. Toronto, ON: Queen's Printer for Ontario; 2014.
2. Personal communication CancerCare Manitoba. Number of girls who received at least one dose of the HPV vaccine in the publicly funded program 2008-2011.
3. Kliewer E, Mahmud S, Demers A, Lambert P, Musto G. Human papillomavirus vaccination and anogenital warts in Manitoba. Winnipeg: CancerCare Manitoba, 20pp, 2012.
4. Kliewer E, Demers A, Lambert P. Uptake of the human papillomavirus vaccine in Manitoba August 2006-December 2009. Winnipeg: CancerCare Manitoba, 43pp, 2012.
5. Thompson LH, Nugent Z, Blanchard JF, Ens C, Yu BN. Increasing incidence of anogenital warts with an urban-rural divide among males in Manitoba, Canada, 1990-2011. *BMC Public Health.* 2016; **16**:219.
6. Drolet M, Deeks SL, Kliewer E, Musto G, Lambert P, Brisson M. Can high overall human papillomavirus vaccination coverage hide sociodemographic inequalities? An ecological analysis in Canada. *Vaccine.* 2016; **34**(16):1874-80.
7. BC Centre for Disease Control. Immunization Uptake in Grade 6 Students 2002-2015. [http://www.bccdc.ca/resource-gallery/Documents/Statistics%20and%20Research/Statistics%20and%20Reports/Immunization/Coverage/Grade6\\_Coverage\\_Results.pdf](http://www.bccdc.ca/resource-gallery/Documents/Statistics%20and%20Research/Statistics%20and%20Reports/Immunization/Coverage/Grade6_Coverage_Results.pdf) . (accessed July 20, 2016).
8. BC Centre for Disease Control. Immunization Uptake in Grade 9 Students 2002-2015. [http://www.bccdc.ca/resource-gallery/Documents/Statistics%20and%20Research/Statistics%20and%20Reports/Immunization/Coverage/Grade9\\_Coverage\\_Results.pdf](http://www.bccdc.ca/resource-gallery/Documents/Statistics%20and%20Research/Statistics%20and%20Reports/Immunization/Coverage/Grade9_Coverage_Results.pdf) . (accessed July 20, 2016).
9. Ogilvie GS, Naus M, Money DM, et al. Reduction in cervical intraepithelial neoplasia in young women in British Columbia after introduction of the HPV vaccine: An ecological analysis. *Int J Cancer.* 2015; **137**(8):1931-7.
10. BC Centre for Disease Control. Human Papillomavirus (HPV) Vaccine. [http://www.bccdc.ca/health-info/immunization-vaccines/vaccines-in-bc/human-papillomavirus-\(hpv\)-vaccine](http://www.bccdc.ca/health-info/immunization-vaccines/vaccines-in-bc/human-papillomavirus-(hpv)-vaccine) (accessed July 2016).
11. Flash Vigie. Bulletin Québécois de vigie, de surveillance et d'intervention en protection de la santé publique. Vol 8 (7) : Septembre 2013. [http://publications.msss.gouv.qc.ca/msss/fichiers/flashvigie/06-271-02W-vol8\\_no7.pdf](http://publications.msss.gouv.qc.ca/msss/fichiers/flashvigie/06-271-02W-vol8_no7.pdf)

#### Denmark

1. Widgren K, Simonsen J, Valentier-Branth P, Molbak K. Uptake of the human papillomavirus-vaccination within the free-of-charge childhood vaccination program in Denmark. *Vaccine* 2011; **29**: 9663-7.
2. Baandrup L, Blomberg M, Dehlendorff C, Sand C, Andersen KK, Kjaer SK. Significant decrease in the incidence of genital warts in young Danish women after implementation of a national human papillomavirus vaccination program. *Sex Transm Dis* 2013; **40**(2): 130-5.
3. Blomberg M, Dehlendorff C, Munk C, Kjaer SK. Strongly decreased risk of genital warts after vaccination against human papillomavirus: nationwide follow-up of vaccinated and unvaccinated girls in Denmark. *Clin Infect Dis* 2013; **57**(7): 929-34.
4. Statens Serum Institut. HPV vaccination-Coverage 2012. <http://www.ssi.dk/English/News/EPI-NEWS/2013/No%2020%20-%202013.aspx>. (accessed May11, 2017).
5. Statens Serum Institut. Uptake in the temporary HPV vaccination program for females born in 1985-1992. <http://www.ssi.dk/English/News/EPI-NEWS/2014/No%2047%20-%202014.aspx>. (accessed July 9, 2016).

#### Germany

1. Mikolajczyk RT, Kraut AA, Horn J, Schulze-Rath R, Garbe E. Changes in incidence of anogenital warts diagnoses after the introduction of human papillomavirus vaccination in Germany-an ecologic study. *Sex Transm Dis* 2013; **40**(1): 28-31.

#### Italy (Veneto)

1. Cocchio S, Baldovin T, Bertoncetto C, et al. Decline in hospitalization for genital warts in the Veneto region after an HPV vaccination program: an observational study. *BMC Infect Dis* 2017; **17**:249.
2. Ministry of Health (Italy). HPV Italian coverage at 31/12/2015. [http://www.salute.gov.it/imgs/C\\_17\\_tavole\\_27\\_allegati\\_iitemAllegati\\_0\\_fileAllegati\\_itemFile\\_0\\_file.pdf](http://www.salute.gov.it/imgs/C_17_tavole_27_allegati_iitemAllegati_0_fileAllegati_itemFile_0_file.pdf). (accessed May 5, 2017).

#### Netherlands

1. Woestenbergh PJ, King AJ, van der Sande MAB, et al., No evidence for cross-protection of the HPV-16/18 vaccine against HPV-6/11 positivity in female STI clinic visitors. *J Infect* 2017; **74**: 393-400.
2. The National Immunisation Programme in the Netherlands Developments in 2013. RIVM Report 150202002/2013. <https://www.rivm.nl/bibliotheek/rapporten/150202002.pdf> (accessed December 10, 2017).
3. The National Immunisation Programme in the Netherlands Surveillance and developments in 2016-2017 RIVM Report 2017-0143. <https://www.rivm.nl/bibliotheek/rapporten/2017-0143.pdf>. (accessed December 7, 2017).
4. The National Immunisation Programme in the Netherlands Developments in 2011. RIVM report 210021015/2011. <https://www.rivm.nl/bibliotheek/rapporten/210021015.pdf>. (accessed May 30, 2018).

#### New Zealand

1. Ministry of Health. History of the HPV immunisation programme. <http://www.health.govt.nz/our-work/preventative-health-wellness/immunisation/hpv-immunisation-programme/history-hpv-immunisation-programme>. (accessed May 30, 2018).
2. Oliphant J, Perkins N. Impact of the human papillomavirus (HPV) vaccine on genital wart diagnoses at Auckland Sexual Health Services. *N Z Med J*. 2011; **124**(1339): 51-8.
3. HPV immunisation Coverage December 2016. [http://www.health.govt.nz/system/files/documents/pages/hpv\\_selected\\_cohorts\\_all\\_dhbs\\_31\\_dec\\_2016\\_final\\_for\\_web.pdf](http://www.health.govt.nz/system/files/documents/pages/hpv_selected_cohorts_all_dhbs_31_dec_2016_final_for_web.pdf) (accessed December 10, 2017)

#### Norway

1. Hansen BT, Campbell S, Burger E, Nygard M. Correlates of HPV vaccine uptake in school-based routine vaccination of preadolescent girls in Norway: A register-based study of 90,000 girls and their parents. *Prev Med*. 2015;**77**:4-10.
2. Norwegian Institute of Public Health. Barnevaksinasjonsprogrammet i Norge. Rapport for 2013. <https://www.fhi.no/globalassets/dokumenterfiler/rapporter/vaksine/barnevaksinasjonsprogrammet-i-norge-rapport-2013>. (accessed May 15, 2018)
3. Feiring B, Laake I, Molden T, et al. Do parental education and income matter? A nationwide register-based study on HPV vaccine uptake in the school-based immunisation programme in Norway. *BMJ Open*. 2015;**5**(5):e006422.

#### Spain (Galicia)

1. Purriños-Hermida MJ, Santiago-Pérez MI, Treviño M, et al. Direct, indirect and total effectiveness of bivalent HPV vaccine in women in Galicia, Spain
2. Personal communication MJ Purriños-Hermida, Vaccination coverage in Galicia, 2014-2017

#### Sweden

1. Leval A, Herweijer E, Arnheim-Dahlstrom L, et al. Incidence of genital warts in Sweden before and after quadrivalent human papillomavirus vaccine availability. *J Infect Dis* 2012; **206**(6): 860-6.
2. Andelen flickor med minst en respektive två registrerade doser HPV-vaccin. <https://www.folkhalsomyndigheten.se/globalassets/statistik-uppfoljning/vaccinationsstatistik/hpv/hpv-statistik-2016-till-webbsida.pdf>. (accessed December 13, 2017)
3. Herweijer E, Ploner A, Sparen P. Substantially reduced incidence of genital warts in women and men six years after HPV vaccine availability in Sweden. *Vaccine* 2018; **36**(15): 1917-20.

#### UK (England)

1. Meshor D, Soldan K, Howell-Jones R, et al. Reduction in HPV 16/18 prevalence in sexually active young women following the introduction of HPV immunisation in England. *Vaccine* 2013; **32**(1): 26-32.
2. Department of Health. Annual HPV vaccine coverage in England 201/2011. [http://media.dh.gov.uk/network/211/files/2012/03/120319\\_HPV\\_UptakeReport2010-11-revised\\_acc.pdf](http://media.dh.gov.uk/network/211/files/2012/03/120319_HPV_UptakeReport2010-11-revised_acc.pdf). (accessed April 5, 2014).

3. Human Papillomavirus (HPV) vaccination coverage in adolescent females in England: 2014/15. [https://www.gov.uk/government/uploads/system/uploads/attachment\\_data/file/487514/HPV\\_2014\\_15\\_ReportFinal181215\\_v1.1.pdf](https://www.gov.uk/government/uploads/system/uploads/attachment_data/file/487514/HPV_2014_15_ReportFinal181215_v1.1.pdf). (accessed December 11, 2017).

#### UK (Scotland)

1. Kavanagh K, Pollock KG, Potts A, et al. Introduction and sustained high coverage of the HPV bivalent vaccine leads to a reduction in prevalence of HPV 16/18 and closely related HPV types. *Br J Cancer* 2014; **110**(11): 2804-11.
2. Information Services Division. HPV immunisation uptake rates by mid-August 2012, for girls in the catch-up cohort. [https://isdscotland.scot.nhs.uk/Health-Topics/Child-Health/Publications/2012-09-25/HPV\\_Catch-up\\_Programme.xls](https://isdscotland.scot.nhs.uk/Health-Topics/Child-Health/Publications/2012-09-25/HPV_Catch-up_Programme.xls). (accessed June 6, 2014).

#### USA

1. Williams WW, Lu P, O'Halloran A, et al. Surveillance of Vaccination Coverage Among Adult Populations — United States, 2014. *MMWR Surveill Summ* 2016; **65**(No. SS-1):1-36
2. Reagan-Steiner S, Yankey D, Jeyarajah J, et al. National, Regional, State, and Selected Local Area Vaccination Coverage Among Adolescents Aged 13-17 Years--United States, 2014. *MMWR Morb Mortal Wkly Rep.* 2015;**64**(29):784-92.
3. Centers for Disease Control and Prevention. 2014 Adolescent Human Papillomavirus (HPV) Vaccination Coverage Report. <https://www.cdc.gov/vaccines/imz-managers/coverage/teenvaxview/data-reports/hpv/dashboard/2014.html>. (accessed December 3, 2017).
4. Centers for Disease Control and Prevention. Vaccination Coverage Among Adults in the United States, National Health Interview Survey, 2015. <https://www.cdc.gov/vaccines/imz-managers/coverage/adultvaxview/coverage-estimates/2015.html>. (accessed December 5, 2017).

**Table S8. Summary of changes in cervical cancer screening recommendations and participation since the introduction of HPV vaccination programs.**

| Countries   | Recommendation during years included in this review |                                                                                                                                                                                   |                                                                                                                                        |                                                                                                                                                                                                                                               | Documented changes over the years included in the review |                                                                                                                                                    |                                                                                                                                                                 |                                                                                                                                                                                                                                         |
|-------------|-----------------------------------------------------|-----------------------------------------------------------------------------------------------------------------------------------------------------------------------------------|----------------------------------------------------------------------------------------------------------------------------------------|-----------------------------------------------------------------------------------------------------------------------------------------------------------------------------------------------------------------------------------------------|----------------------------------------------------------|----------------------------------------------------------------------------------------------------------------------------------------------------|-----------------------------------------------------------------------------------------------------------------------------------------------------------------|-----------------------------------------------------------------------------------------------------------------------------------------------------------------------------------------------------------------------------------------|
|             | Age at start of screening                           | Screening intervals                                                                                                                                                               | HPV testing                                                                                                                            | Other                                                                                                                                                                                                                                         | Age at start of screening                                | Screening intervals                                                                                                                                | HPV testing                                                                                                                                                     | Other                                                                                                                                                                                                                                   |
| Australia   | 18-20 yrs or 2 yrs after sex initiation             | 2 yrs                                                                                                                                                                             | No                                                                                                                                     | Primary HPV testing will begin in 12/2017                                                                                                                                                                                                     | No significant change                                    | No significant change                                                                                                                              | No significant change                                                                                                                                           | Change to follow-up of abnormalities (repeat Pap for LSIL rather than colposcopy), colposcopy for persistent ASC-US rather than annual testing. Decline in participation of women <45 and lower participation in vaccinated young women |
| Canada (BC) | Since 2011: 21 yrs or 3 yrs after sex initiation    | 1-2 yrs                                                                                                                                                                           | No                                                                                                                                     | New guidelines in 2016 (start age = 25 yrs; interval = 3 yrs)                                                                                                                                                                                 | Steady decline in screening of girls 15-17 yrs           | No significant change                                                                                                                              | No significant change                                                                                                                                           |                                                                                                                                                                                                                                         |
| Denmark     | 23 yrs                                              | 3 yrs (women 23-49 yrs); 5 yrs (women 50-64 yrs)                                                                                                                                  | Since 2005: triage of ASCUS, LSIL, unsatisfactory                                                                                      |                                                                                                                                                                                                                                               | No significant change                                    | No significant change                                                                                                                              | Introduction of HPV testing 1 yrs before the start of HPV vaccination                                                                                           | Better registration over time of CIN; Since 2000, gradual implementation of LBC and better sensitivity of LBC vs conventional cytology                                                                                                  |
| Norway      | 25 yrs                                              | 3 yrs                                                                                                                                                                             | Since 2005: triage of ASCUS, LSIL, unsatisfactory                                                                                      |                                                                                                                                                                                                                                               | Steady decline in screening of women < 25yrs             | No significant change                                                                                                                              | Introduction of HPV testing 2 yrs before the start of HPV vaccination                                                                                           | Since 2006, gradual implementation of LBC                                                                                                                                                                                               |
| UK-Scotland | 20 yrs                                              | 3 yrs                                                                                                                                                                             | No                                                                                                                                     | New guidelines in 2016 (start age =25; screening interval = 3 yrs (25-49 yrs), 5 yrs (50-64 yrs))                                                                                                                                             | No significant change                                    | No significant change                                                                                                                              | No significant change                                                                                                                                           |                                                                                                                                                                                                                                         |
| USA         | Since 2009: 21 yrs                                  | Since 2009: 2 yrs (women 21-29 yrs); 3 yrs (women ≥30 yrs after 3 negative tests); Since 2012: 3 yrs for cytology alone (women 30-65 yrs), 5 yrs for co-testing (women 30-65 yrs) | Since 2004: recommendations for co-testing (women ≥30 yrs) and triage of ASCUS for all women. Since 2012: co-testing (women 30-65 yrs) | Since 2012: change in recommendation for management of women 21-24 yrs with abnormal cytology limiting referrals for colposcopy; Changes in diagnostic terminology for high-grade lesions: may have an impact on case classification by grade | Steady decline in screening of women < 21yrs             | Increased, especially for women screened by co-testing. Increase from a median of 1.5 yrs (2007) to 3yrs (2014) (unpublished data from New Mexico) | Since 2007, 82% of ASCUS triaged with HPV-testing. Important increase in co-testing (women 30-65 yrs). Regional differences in the timing of HPV testing uptake | HPV testing of abnormal cytology led to higher CIN2+ and CIN3+ detection rates                                                                                                                                                          |

ASCUS: Atypical squamous cells of undetermined significance; CIN: Cervical intraepithelial neoplasia; LSIL: low-grade squamous intraepithelial lesions; LBC: Liquid-based cytology

## REFERENCES

### Australia

- 1) Brotherton JM, Fridman M, May CL, Chappell G, Saville AM, Gertig DM. Early effect of the HPV vaccination programme on cervical abnormalities in Victoria, Australia: an ecological study. *Lancet* 2011; **377**:2085-92.
- 2) National cervical screening program. <http://www.cancerscreening.gov.au/>. (accessed November 11, 2017).

### Canada, British Columbia

- 1) BC Cancer Agency Cervical Cancer Screening Program Annual Report, 2012. Vancouver, BC, 2012. [http://www.bccancer.bc.ca/screening/Documents/CCSP\\_Report-AnnualReport2012.pdf](http://www.bccancer.bc.ca/screening/Documents/CCSP_Report-AnnualReport2012.pdf). (accessed December 5, 2017).
- 2) BC Cancer Agency Cervical Cancer Screening Policy Change. [http://www.bccancer.bc.ca/screening/Documents/CCSP\\_GuidelinesManual-CervicalCancerScreeningProtocols.pdf](http://www.bccancer.bc.ca/screening/Documents/CCSP_GuidelinesManual-CervicalCancerScreeningProtocols.pdf) (accessed November 5, 2017).
- 3) Ogilvie GS, Naus M, Money DM, et al. Reduction in cervical intraepithelial neoplasia in young women in British Columbia after introduction of the HPV vaccine: An ecological analysis, *Int J Cancer* 2015; **137**: 1931-37.

### Denmark

- 1) Baldur-Felskov B, Dehlendorff C, Junge J, Munk C, Kjaer SK. Incidence of cervical lesions in Danish women before and after implementation of a national HPV vaccination Program, *Cancer Causes Control*, 2014; **25**: 915-22.
- 2) National Board of Health, Cervical cancer screening 2007. <https://www.sst.dk/~media/4028E09321C1403480B3E86020F58A18.ashx>. (accessed November 3, 2017).

### Norway

- 1) Kreftregisteret. Institutt for populasjons-basert kreftforskning. <https://www.kreftregisteret.no/globalassets/publikasjoner-og-rapporter/livmorhalskreft/arsrapport/aarsrapport-livmorhalsprogrammet-2015.pdf>. (accessed November 3, 2017).
- 2) Nygård M, Røysland K, Campbell S, Dillner J. Comparative effectiveness study on human papillomavirus detection methods used in the cervical cancer screening programme. *BMJ Open* 2014; **4**(1); e003460.

### UK- Scotland

- 1) National Services Scotland, Cervical cancer screening. <http://www.isdscotland.org/Health-topics/Cancer/Cervical-screening/>. (accessed November 5, 2017).

### USA

- 1) American College of Obstetricians and Gynecologists, ACOG Practice Bulletin Number 109: Cervical cytology screening. *Obstet Gynecol.* 2009; **114**(6):1409-20
- 2) American College of Obstetricians and Gynecologists, ACOG Practice Bulletin Number 131: Screening for cervical cancer. *Obstet Gynecol.* 2012; **120**(5):1222-38
- 3) Benard VB, Castle PE, Jenison SA, et al., Population-based incidence rates of cervical intraepithelial neoplasia in the human papillomavirus vaccine era. *JAMA Oncol* 2017; **3**(6):833-37
- 4) Centers for Disease Control and Prevention (CDC). Cervical cancer screening among women aged 18-30 years – United States, 2000-2010. *MMWR Morb Mortal Wkly Rep* 2013; **61**(51-52): 1038-42.
- 5) Cuzick J, Myers O, Hunt WC, et al. Human papillomavirus testing 2007–2012: Co-testing and triage utilization and impact on subsequent clinical management. *Int J Cancer* 2015; **136**: 2854-63
- 6) Cuzick J, Myers O, Lee JH, et al. Outcomes in women with cytology showing atypical squamous cells of undetermined significance with vs without human papillomavirus testing. *JAMA Oncol*; **3**(10): 1327-34
- 7) Fowler CI, Saraiya M, Moskosky SB, Miller JW, Gable J, Mautone-Smith N. Trends in Cervical Cancer Screening in Title X-Funded Health Centers – United States, 2005-2015. *MMWR Morb Mortal Wkly Rep* 2017; **66**(37):981-5.

- 8) Huh WK, Ault KA, Chelmow D, et al. Use of primary high-risk human papillomavirus testing for cervical cancer screening: interim clinical guidance. *J Low Genit Tract Dis*. 2015; **19**(2): 91-6.
- 9) Saslow D, Solomon D, Lawson HW, et al. American Cancer Society, American Society for Colposcopy and Cervical Pathology, and American Society for Clinical Pathology screening guidelines for the prevention and early detection of cervical cancer. *CA Cancer J Clin*. 2012; **62**(3):147–72.
- 10) Massad LS, Einstein MH, Huh WK, et al. 2012 updated consensus guidelines for the management of abnormal cervical cancer screening tests and cancer precursors. *J Low Genit Tract Dis*. 2013. **17**(5 Suppl 1): S1-s27.
- 11) Silver MI, Rositch AF, Phelan-Emrick DF, Gravitt PE. Uptake of HPV testing and extended cervical cancer screening intervals following cytology alone and Pap/HPV cotesting in women aged 30-65 years. *Cancer Causes Control*. 2018 ;**29**(1):43-50.
- 12) U.S. Preventive Services Task Force. Screening for cervical cancer: U.S. Preventive Services Task Force recommendation statement. AHRQ publication no. 11–05156-EF-2. March 2012.
- 13) Wright TC Jr, Cox JT, Massad LS, Twiggs LB, Wilkinson EJ; ASCCP-Sponsored Consensus Conference. 2001 consensus guidelines for the management of women with cervical cytological abnormalities. *JAMA*. 2002. **287**(16), 2120-9.
- 14) Wright TC Jr, Massad LS, Dunton CJ, Spitzer M, Wilkinson EJ, Solomon D; 2006 ASCCP-Sponsored Consensus Conference. 2006 consensus guidelines for the management of women with abnormal cervical screening tests. *J Low Genit Tract Dis*, 2006. **11**(4), 201-22.



**Table S9. Pre- and post-vaccination years considered in the meta-analysis (normal font: years included in our previous review; bold font: years from updates/new studies identified in the current review).**

| Study                                     | Country          | Study population | HPV vaccination introduction female-only/ gender-neutral | Pre-vaccination years considered in meta-analysis | Post-vaccination years |             |             |             |             |             |             |             |   |
|-------------------------------------------|------------------|------------------|----------------------------------------------------------|---------------------------------------------------|------------------------|-------------|-------------|-------------|-------------|-------------|-------------|-------------|---|
|                                           |                  |                  |                                                          |                                                   | 1                      | 2           | 3           | 4           | 5           | 6           | 7           | 8           | 9 |
| <b>HPV infection</b>                      |                  |                  |                                                          |                                                   |                        |             |             |             |             |             |             |             |   |
| Chow 2015/Chow 2017                       | Australia        | Females/males    | 2007/2013                                                | 2005-2007                                         | <b>2008</b>            | <b>2009</b> | <b>2010</b> | <b>2011</b> | <b>2012</b> | <b>2013</b> | <b>2014</b> |             |   |
| Cummings 2012                             | USA              | Females          | 2006/2011                                                | 1995-2005                                         |                        |             |             | 2010        |             |             |             |             |   |
| Dillner 2018                              | Denmark          | Females          | 2009                                                     | 2006-2008                                         |                        |             |             | <b>2012</b> | <b>2013</b> |             |             |             |   |
|                                           | Sweden           | Females          | 2012 <sup>†</sup>                                        | 2006-2008                                         | <b>2012</b>            | <b>2013</b> |             |             |             |             |             |             |   |
| Dunne 2015                                | USA              | Females          | 2006/2011                                                | 2007                                              |                        |             |             |             |             | <b>2012</b> | <b>2013</b> |             |   |
| Grün 2016                                 | Sweden           | Females/males*   | 2012 <sup>†</sup>                                        | 2008-2011                                         |                        | <b>2013</b> | <b>2014</b> | <b>2015</b> |             |             |             |             |   |
| Kavanagh 2014/Cameron 2016/Kavanagh 2017  | Scotland         | Females          | 2008                                                     | 2009-2010                                         |                        |             | 2011        | 2012        | <b>2013</b> | <b>2014</b> | <b>2015</b> |             |   |
| Kahn 2012/Kahn 2016                       | USA              | Females          | 2006/2011                                                | 2006-2007                                         |                        |             | 2009        | 2010        |             |             | <b>2013</b> | <b>2014</b> |   |
| Machalek 2018                             | Australia        | Females          | 2007/2013                                                | 2005-2007                                         |                        |             |             |             |             |             |             | <b>2015</b> |   |
| Markowitz 2013/Markowitz 2016/Oliver 2017 | USA              | Females          | 2006/2011                                                | 2003-2006                                         | 2007                   | 2008        | 2009        | 2010        | <b>2011</b> | <b>2012</b> | <b>2013</b> | <b>2014</b> |   |
| Meshner 2013/Meshner 2016/ Meshner 2018   | England          | Females          | 2008                                                     | 2008                                              |                        | 2010        | 2011        | 2012        | <b>2013</b> | <b>2014</b> | <b>2015</b> | <b>2016</b> |   |
| Purriños-Hermida 2018                     | Spain (Galicia)  | Females          | End 2008                                                 | 2008-2010                                         |                        |             |             |             | <b>2014</b> | <b>2015</b> | <b>2016</b> | <b>2017</b> |   |
| Söderlund-Strand 2014                     | Sweden           | Females          | 2012 <sup>†</sup>                                        | 2008                                              | <b>2012</b>            | <b>2013</b> |             |             |             |             |             |             |   |
| Sonnenberg 2013                           | U.K.             | Females/males    | 2008                                                     | 1999-2001                                         |                        | 2010        | 2011        | 2012        |             |             |             |             |   |
| Tabrizi 2012/Tabrizi 2014                 | Australia        | Females          | 2007/2013                                                | 2005-2007                                         |                        |             | 2010        | 2011        | 2012        |             |             |             |   |
| <b>AGW consultations</b>                  |                  |                  |                                                          |                                                   |                        |             |             |             |             |             |             |             |   |
| Ali 2013/Callander 2016                   | Australia        | Females/males    | 2007/2013                                                | 2005-2007                                         | 2008                   | 2009        | 2010        | 2011        | 2012        | <b>2013</b> | <b>2014</b> | <b>2015</b> |   |
| Baandrup 2013/Bollerup 2016               | Denmark          | Females/males    | 2009                                                     | 2007-2009                                         | 2010                   | 2011        | <b>2012</b> | <b>2013</b> |             |             |             |             |   |
| Bauer 2012                                | USA              | Females/males    | 2006/2011                                                | 2007                                              |                        | 2008        | 2009        | 2010        |             |             |             |             |   |
| Cocchio 2017                              | Italy            | Females/males    | 2008                                                     | 2006-2008                                         | <b>2009</b>            | <b>2010</b> | <b>2011</b> | <b>2012</b> | <b>2013</b> | <b>2014</b> | <b>2015</b> |             |   |
| Dominiak-Felden 2015                      | Belgium          | Females/males    | 2007 <sup>§</sup>                                        | 2006-2007                                         | <b>2008</b>            | <b>2009</b> | <b>2010</b> | <b>2011</b> | <b>2012</b> | <b>2013</b> |             |             |   |
| Flagg 2013/Flagg 2018                     | USA              | Females/males    | 2006/2011                                                | 2004-2006                                         | 2007                   | 2008        | 2009        | 2010        | <b>2011</b> | <b>2012</b> | <b>2013</b> | <b>2014</b> |   |
| Guerra 2016                               | Canada (Ontario) | Females/males    | 2007                                                     | 2005-2007                                         | <b>2008</b>            | <b>2009</b> | <b>2010</b> | <b>2011</b> | <b>2012</b> | <b>2013</b> |             |             |   |

| Study                              | Country                                                    | Study population | HPV vaccination introduction female-only/ gender-neutral | Pre-vaccination years considered in meta-analysis | Post-vaccination years |             |             |             |             |             |             |             |             |
|------------------------------------|------------------------------------------------------------|------------------|----------------------------------------------------------|---------------------------------------------------|------------------------|-------------|-------------|-------------|-------------|-------------|-------------|-------------|-------------|
|                                    |                                                            |                  |                                                          |                                                   | 1                      | 2           | 3           | 4           | 5           | 6           | 7           | 8           | 9           |
| Harrison 2014 <sup>€</sup>         | Australia                                                  | Females/males    | 2007/2013                                                | 2005-2007                                         | <b>2008</b>            | <b>2009</b> | <b>2010</b> | <b>2011</b> | <b>2012</b> | <b>2013</b> | <b>2014</b> | <b>2015</b> |             |
| Howell-Jones 2013/Canvin 2017      | England                                                    | Females/males    | 2008                                                     | 2006-2008                                         | 2009                   | 2010        | 2011        | <b>2012</b> | <b>2013</b> | <b>2014</b> | <b>2015</b> |             |             |
| Kliewer 2012/Thompson 2016         | Canada (Manitoba)                                          | Females/males    | 2008/2016                                                | 2006-2008                                         | 2009                   | <b>2010</b> | <b>2011</b> |             |             |             |             |             |             |
| Leval 2012/Herweijer 2018          | Sweden                                                     | Females/males    | 2006                                                     | 2006 <sup>‡</sup>                                 | 2007                   | 2008        | 2009        | 2010        | <b>2011</b> | <b>2012</b> |             |             |             |
| Liu 2014                           | Australia                                                  | Females          | 2007/2013                                                | 2001                                              |                        |             |             | <b>2011</b> |             |             |             |             |             |
| Mikolajczyk 2013/Thöne 2017        | Germany                                                    | Females/males    | 2007                                                     | 2005-2007                                         | 2008                   | <b>2009</b> | <b>2010</b> |             |             |             |             |             |             |
| Oliphant 2011/ Oliphant 2017       | New Zealand                                                | Females/males    | 2008                                                     | 2007-2008                                         | 2009                   | 2010        | <b>2011</b> | <b>2012</b> | <b>2013</b> |             |             |             |             |
| Smith 2015                         | Australia                                                  | Females/males    | 2007/2013                                                | 2005-2007                                         | <b>2008</b>            | <b>2009</b> | <b>2010</b> | <b>2011</b> |             |             |             |             |             |
| Sonnenberg 2017                    | U.K.                                                       | Females/males    | 2008                                                     | 1999-2001                                         |                        | <b>2010</b> | <b>2011</b> | <b>2012</b> |             |             |             |             |             |
| Steben 2018                        | Canada (Quebec)                                            | Females/males    | 2008/2016                                                | 2004-2007                                         | <b>2009</b>            | <b>2010</b> | <b>2011</b> | <b>2012</b> |             |             |             |             |             |
| Woestenberg 2017                   | Netherlands                                                | Females/males    | 2009                                                     | 2009                                              |                        | <b>2011</b> |             | <b>2013</b> |             |             |             |             |             |
| <b>CIN2+</b>                       |                                                            |                  |                                                          |                                                   |                        |             |             |             |             |             |             |             |             |
| Baldur-Felskov 2014                | Denmark                                                    | Females          | 2009                                                     | 2007-2009                                         | <b>2010</b>            | <b>2011</b> | <b>2012</b> | <b>2013</b> |             |             |             |             |             |
| Benard 2017                        | USA (New Mexico)                                           | Females          | 2006/2011                                                | 2007                                              |                        | <b>2008</b> | <b>2009</b> | <b>2010</b> | <b>2011</b> | <b>2012</b> | <b>2013</b> | <b>2014</b> |             |
| Brotherton 2011/AIHW 2016/AIHW2018 | Australia                                                  | Females          | 2007/2013                                                | 2005-2007                                         | 2008                   | 2009        | 2010        | 2011        | <b>2012</b> | <b>2013</b> | <b>2014</b> | <b>2015</b> | <b>2016</b> |
| Flagg 2016                         | USA                                                        | Females          | 2006/2011                                                | 2007                                              |                        | <b>2008</b> | <b>2009</b> | <b>2010</b> | <b>2011</b> | <b>2012</b> | <b>2013</b> | <b>2014</b> |             |
| Gargano 2018 <sup>€</sup>          | USA (California, Connecticut, New York, Oregon, Tennessee) | Females          | 2006/2011                                                | 2008                                              |                        |             | <b>2009</b> | <b>2010</b> | <b>2011</b> | <b>2012</b> | <b>2013</b> | <b>2014</b> | <b>2015</b> |
| Niccolai 2013/2017 <sup>†</sup>    | USA (Connecticut)                                          | Females          | 2006/2011                                                | 2008                                              |                        |             |             | 2010        |             | <b>2012</b> |             | <b>2014</b> |             |
| Nygård 2017 (via Liaw 2014)        | Norway                                                     | Females          | 2009                                                     | 2007-2009                                         | <b>2010</b>            | <b>2011</b> | <b>2012</b> | <b>2013</b> | <b>2014</b> |             |             |             |             |
| Ogilvie 2015                       | Canada (British Columbia)                                  | Females          | 2008                                                     | 2005-2008                                         | <b>2009</b>            | <b>2010</b> | <b>2011</b> | <b>2012</b> |             |             |             |             |             |
| Pollock 2014                       | Scotland                                                   | Females          | 2008                                                     | 2008                                              | <b>2009</b>            | <b>2010</b> | <b>2011</b> | <b>2012</b> | <b>2013</b> | <b>2014</b> |             |             |             |

\* Cervical and oral HPV prevalence was available for women but only data about Cervical HPV prevalence are presented over time; only oral HPV prevalence was available for men.

† The vaccine is available since 2006 in Sweden and was reimbursed from 2007. However, the organized, publicly funded program was launched in 2012. Söderlund-Strand et al. considered 2008 as a pre-vaccination year and 2012, 2013 as post-vaccination years; vaccination coverage increased substantially in 2012. We considered 2012 as the first year post-vaccination for the 3 studies about HPV infections in Sweden.

- § The vaccine is available and reimbursed since 2007 in Belgium. However, the school-based program began in 2010 in the Flemish region and in 2011 in the French region. Dominiak-Felden considered 2006-2007 as pre-vaccination years.
- € Published data were available until 2012, but the author provided data up to 2015.
- ‡ The vaccine is available since 2006 in Sweden and was reimbursed from 2007. However, the organized, publicly funded program was launched in 2012. The authors of this study considered 2006 as the beginning of HPV vaccination.
- £ 2008 was considered as a pre-vaccination year in these studies since 1) data were not available prior to 2008 and 2) the vaccination coverage was still very low in 2008.
- ¥ Number of CIN2+ were available for each year from 2008 to 2015, however estimates of the number of screened women were only available for 2008, 2010, 2012, and 2014. For this reason analyses were restricted to years with available estimates of number of women screened.

**Table S10. Characteristics of the studies included in the systematic review and meta-analysis**

| Author (Country)                                                        | Vaccine      | Data source*                                                                   | Study population                                                                                     | Population used in meta-analysis            | Data collection dates <sup>†</sup>                                       | Sample size used in meta-analysis <sup>‡</sup>                                                     | Case definition                                                                                                                                                                                                              | Effect measure in publication        | Effect measure recalculated <sup>§</sup> |
|-------------------------------------------------------------------------|--------------|--------------------------------------------------------------------------------|------------------------------------------------------------------------------------------------------|---------------------------------------------|--------------------------------------------------------------------------|----------------------------------------------------------------------------------------------------|------------------------------------------------------------------------------------------------------------------------------------------------------------------------------------------------------------------------------|--------------------------------------|------------------------------------------|
| <b>HPV infection</b>                                                    |              |                                                                                |                                                                                                      |                                             |                                                                          |                                                                                                    |                                                                                                                                                                                                                              |                                      |                                          |
| Chow 2015a<br>Chow 2017<br>(Australia) <sup>12, 13</sup>                | Quadrivalent | Clinic-based: STI clinics                                                      | Females and males 15-25 yrs attending the Melbourne Sexual Health Centre diagnosed with chlamydia    | Females and males 15-24 yrs <sup>Ω</sup>    | Prevaccine:2005-2007<br>Postvaccine:2008-2014                            | Females<br>N prevaccine:128<br>N postvaccine:260<br>Males<br>N prevaccine:115<br>N postvaccine:411 | HPV+ PapType HR HPV genotyping kit (Genera Biosystem) Females: cervical & vaginal swabs<br>Males: urine and urethral swabs                                                                                                   | Crude HPV prevalence over time       | RR of HPV prevalence (crude)             |
| Cummings 2012 (U.S.) <sup>14</sup>                                      | Quadrivalent | Clinic-based: Primary care clinics                                             | Females 14-17 yrs attending 1 of 3 urban primary care clinics in Indianapolis                        | Females 14-17 yrs                           | Prevaccine:1999-2005<br>Postvaccine:2010                                 | N prevaccine:150<br>N postvaccine:75                                                               | HPV+ Roche Linear Array (Roche, 37 types)                                                                                                                                                                                    | OR of HPV prevalence (crude)         | RR of HPV prevalence (crude)             |
| Dillner 2018 <sup>11</sup>                                              | Quadrivalent | Clinic-based: Nationwide cervical screening program of Denmark, Sweden, Norway | Females 18-50 attending routine cervical cancer                                                      | Females 18-29 yrs from Denmark and Sweden** | Prevaccine: 2006-2008<br>Postvaccine: 2012-2013                          | Denmark/ Sweden<br>N prevaccine: 1,188/1,112<br>N postvaccine: 1,163/1,164                         | HPV+ Luminex system (Bio-Rad, 35 types)                                                                                                                                                                                      | Difference of HPV prevalence (crude) | RR of HPV prevalence (crude)             |
| Dunne 2015 (USA) <sup>15</sup>                                          | Quadrivalent | Clinic-based: Kaiser Permanente NorthWest                                      | Females 20-29 yrs attending routine cervical cancer screening (cytology)                             | Females 20-29 yrs                           | Prevaccine:2007<br>Postvaccine:2012-2013                                 | N prevaccine:4,138<br>N postvaccine:4,171                                                          | HPV+ Roche Linear Array & HPV-52 quantitative PCR                                                                                                                                                                            | RR of HPV prevalence (crude)         | RR of HPV prevalence (crude)             |
| Grün 2016 (Sweden) <sup>16</sup>                                        | Quadrivalent | Clinic-based: Youth clinic in Stockholm                                        | Females and males (oral infections for males) 15-23 yrs attending a Stockholm youth clinic           | Females 15-23 yrs <sup>Ω</sup>              | Prevaccine: 2008-2011<br>Postvaccine: 2013-2015                          | N prevaccine: 544 <sup>‡</sup><br>N postvaccine: 332                                               | HPV+ Luminex-based genotyping assay (27 types)                                                                                                                                                                               | Crude HPV prevalence over time       | RR of HPV prevalence (crude)             |
| Kahn 2012/<br>Kahn 2016 (USA) <sup>20, 21</sup>                         | Quadrivalent | Clinic-based: Hospital and health department                                   | Females 13-26 yrs attending 1 hospital-based teen clinic and 2 health department sites in Cincinnati | Females 13-26 yrs, Had had sexual contact   | Prevaccine:2006-2007<br>Postvaccine1:2009-2010<br>Postvaccine2:2013-2014 | N prevaccine:355<br>N postvaccine1:408<br>N postvaccine2:400                                       | HPV+ Roche Linear Array (Roche, 37 types)                                                                                                                                                                                    | HPV prevalence difference (adjusted) | RR of HPV prevalence (adjusted)          |
| Kavanagh 2014/<br>Cameron 2016/Kavanagh 2017(Scotland) <sup>17-19</sup> | Bivalent     | Clinic-based: Scottish Cervical screening Call & Recall System                 | Females 20-21 yrs participating in cervical cancer screening in Scotland                             | Females 20-21 yrs                           | Prevaccine:2009-2010<br>Postvaccine1:2011-2012<br>Postvaccine2:2013-2015 | N prevaccine:2,705<br>N postvaccine1:1,994<br>N postvaccine2:3,702                                 | HPV+ Multimetrix HPV assay (18 types)                                                                                                                                                                                        | Crude HPV prevalence over time       | RR of HPV prevalence (crude)             |
| Machalek 2018 <sup>‡</sup> (Australia) <sup>22</sup>                    | Quadrivalent | Clinic-based: Family planning clinics                                          | Females 18-35 yrs attending family planning clinics in Victoria and New South Wales                  | Females 25-29 yrs                           | Prevaccine:2005-2007<br>Postvaccine:2015                                 | N prevaccine:102<br>N postvaccine:114                                                              | 2005-2007: HPV+ Amplicor HPV test kit (Roche Molecular system-13 types), and PGMY09-PGMY11 PCR-ELISA<br>Roche Linear Array genotyping test (37 types);<br>2015: HPV+ Cobas HPV test (Roche Diagnosis) and Roche Linear Array | RR of HPV prevalence (adjusted)      | RR of HPV prevalence (adjusted)          |

| Author (Country)                                                                        | Vaccine      | Data source*                                                                                   | Study population                                                                                                                           | Population used in meta-analysis                                     | Data collection dates <sup>†</sup>                                       | Sample size used in meta-analysis <sup>‡</sup>                                                        | Case definition                                                                                                                                           | Effect measure in publication                      | Effect measure recalculated <sup>B</sup>  |
|-----------------------------------------------------------------------------------------|--------------|------------------------------------------------------------------------------------------------|--------------------------------------------------------------------------------------------------------------------------------------------|----------------------------------------------------------------------|--------------------------------------------------------------------------|-------------------------------------------------------------------------------------------------------|-----------------------------------------------------------------------------------------------------------------------------------------------------------|----------------------------------------------------|-------------------------------------------|
|                                                                                         |              |                                                                                                |                                                                                                                                            |                                                                      |                                                                          |                                                                                                       | genotyping test (37 types)                                                                                                                                |                                                    |                                           |
| Markowitz 2013/<br>Markowitz 2016/<br>Oliver 2017<br>(USA) <sup>23-25</sup>             | Quadrivalent | Population-based:<br>NHANES<br>participants                                                    | Nationally representative<br>sample of USA females<br>aged 14-59 yrs                                                                       | Females<br>14-29 yrs                                                 | Prevaccine:2003-2006<br>Postvaccine1:2007-2010<br>Postvaccine2:2011-2014 | N prevaccine:2,198<br>N postvaccine1:1,599<br>N postvaccine2:1,634                                    | HPV+ Roche Linear<br>Array (Roche, 37 types)                                                                                                              | RR of HPV<br>prevalence<br>(adjusted)              | RR of HPV<br>prevalence<br>(adjusted)     |
| Mesher 2013/<br>Mesher 2016/<br>Mesher 2018<br>(England) <sup>26-28</sup>               | Bivalent     | Clinic-based:<br>Community sexual<br>health clinics, GP                                        | Females 16-24 yrs<br>undergoing chlamydia<br>screening in community<br>sexual health / GP<br>/Youth clinics in 7<br>regions around England | Females<br>16-24 yrs                                                 | Prevaccine:2008<br>Postvaccine1:2010-2012<br>Postvaccine2:2013-2016      | N prevaccine:2,354<br>N postvaccine1:7,924<br>N postvaccine2:7,535                                    | 2008: Hybrid Capture 2<br>and Roche Linear Array<br>≥2010: HPV+ In-house<br>multiplex PCR and<br>Luminex-based genotyping<br>(20 types) <sup>1</sup>      | OR of HPV<br>prevalence<br>(adjusted)              | RR of HPV<br>prevalence<br>(adjusted)     |
| Purriños-Hermida<br>2018 (Spain) <sup>29</sup>                                          | Bivalent     | Clinic-based:<br>Primary care center,<br>gynecology<br>department, family<br>counseling center | Females 18-26 yrs<br>attending health areas of<br>the Galician Public<br>Health Services                                                   | Females<br>18-26 yrs                                                 | Prevaccine:2008-2010<br>Postvaccine:2014-2017                            | N prevaccine:523<br>N postvaccine:745                                                                 | HPV+ Cobas 4800 HPV<br>test with Linear Array<br>HPV genotyping (Roche<br>Diagnostic) (12 types)                                                          | RR of HPV<br>prevalence<br>(crude and<br>adjusted) | RR of HPV<br>prevalence<br>(adjusted)     |
| Söderlund-Strand<br>2014<br>(Sweden) <sup>30</sup>                                      | Quadrivalent | Clinic-based:<br>Chlamydia<br>screening                                                        | Females all ages<br>attending to Chlamydia<br>screening                                                                                    | Females<br>15-29 yrs                                                 | Prevaccine:2008<br>Postvaccine:2012-2013                                 | N prevaccine:15,767<br>N postvaccine:5216                                                             | HPV + In-house<br>multiplex PCR with<br>genotyping by MALDI-<br>TOF mass spectrometry<br>(16 types)                                                       | Crude HPV<br>prevalence over<br>time               | RR of HPV<br>prevalence<br>(crude)        |
| Sonnenberg 2013<br>(England, Scotland,<br>Wales) <sup>31</sup>                          | Bivalent     | Population-based:<br>Natsal participants                                                       | Nationally representative<br>sample of males and<br>females aged 16-44 yrs<br>Natsal-2, 16-74 yrs<br>Natsal-3 in Britain                   | Females and<br>males<br>18-29 yrs                                    | Prevaccine:1999-2001<br>Postvaccine:2010-2012                            | Females<br>N prevaccine:684<br>N postvaccine:1,426<br>Males<br>N prevaccine:462<br>N postvaccine:1061 | HPV+ In-house Luminex-<br>based genotyping assay<br>(18 types) <sup>1</sup> in urine<br>samples                                                           | OR of HPV<br>prevalence<br>(age-adjusted)          | RR of HPV<br>prevalence<br>(age-adjusted) |
| Tabrizi 2012/2014<br>(Australia) <sup>32,33</sup>                                       | Quadrivalent | Clinic-based:<br>Family planning<br>clinics                                                    | Females 18-24 yrs<br>attending 1 of 6 family<br>planning clinics in<br>Sydney, Melbourne,<br>Perth                                         | Females<br>18-24 yrs                                                 | Prevaccine:2005-2007<br>Postvaccine1:2010-2011<br>Postvaccine2: 2012     | N prevaccine:202<br>N postvaccine1:404<br>N postvaccine2:654                                          | HPV+ Amplicor HPV test<br>kit (Roche Molecular<br>system-13 types), and<br>PGMY09-PGMY11<br>PCR-ELISA Roche<br>Linear Array genotyping<br>test (37 types) | RR of HPV<br>prevalence<br>(adjusted)              | RR of HPV<br>prevalence<br>(adjusted)     |
| <b>Anogenital warts</b>                                                                 |              |                                                                                                |                                                                                                                                            |                                                                      |                                                                          |                                                                                                       |                                                                                                                                                           |                                                    |                                           |
| Ali 2013/<br>Chow 2015b, Ali<br>2017, Callander<br>2016 (Australia)<br><sup>34-37</sup> | Quadrivalent | Clinic-based: STI<br>clinics                                                                   | New clients of 40 sexual<br>health centers across<br>Australia aged ≥ 12 yrs<br>(Australian born)                                          | Australian born<br>females and<br>heterosexual<br>males<br>15-39 yrs | 2004-2015<br>Prevaccine: 2005-2007<br>Postvaccine:2008-2015              | P-yr prevaccine:<br>51,010<br>P-yr postvaccine:<br>134,614                                            | Clinical diagnosis                                                                                                                                        | Annual<br>proportion of<br>new clients with<br>AGW | RR of AGW<br>proportion<br>(crude)        |

| Author (Country)                                               | Vaccine      | Data source*                                                                                                                         | Study population                                                                                                                | Population used in meta-analysis                                                                      | Data collection dates <sup>†</sup>                          | Sample size used in meta-analysis <sup>‡</sup>                    | Case definition                                                                                                                                                                                                                                                   | Effect measure in publication                                           | Effect measure recalculated <sup>§</sup>         |
|----------------------------------------------------------------|--------------|--------------------------------------------------------------------------------------------------------------------------------------|---------------------------------------------------------------------------------------------------------------------------------|-------------------------------------------------------------------------------------------------------|-------------------------------------------------------------|-------------------------------------------------------------------|-------------------------------------------------------------------------------------------------------------------------------------------------------------------------------------------------------------------------------------------------------------------|-------------------------------------------------------------------------|--------------------------------------------------|
| Baandrup 2013/<br>Bollerup 2016<br>(Denmark) <sup>38, 39</sup> | Quadrivalent | Population-based:<br>Statistics Denmark,<br>National Patient<br>Registry                                                             | Entire population of<br>Denmark ≥ 12 yrs                                                                                        | Females and<br>males<br>15-39 yrs                                                                     | 2006-2013<br>Prevaccine: 2007-2009<br>Postvaccine:2010-2013 | P-yr prevaccine:<br>5,144,888<br>P-yr postvaccine:<br>6,945,980   | ICD-10 code A63.0 OR<br>prescription of<br>Podophyllotoxin                                                                                                                                                                                                        | Annual incidence<br>rate of diagnosed<br>AGW in the<br>population       | RR of AGW<br>incidence<br>(crude)                |
| Bauer 2012<br>(USA) <sup>40</sup>                              | Quadrivalent | Health provider<br>/insurance-based:<br>Clinical encounters<br>claims data of a<br>health program                                    | Clients of the California<br>Family Planning access<br>care & treatment<br>(PACT) program aged ≥<br>10 yrs (87% females)        | Females and males<br>15-39 yrs<br>Program serves<br>low-income<br>individuals                         | 2007-2010<br>Prevaccine: 2007<br>Postvaccine:2008-2010      | P-yr prevaccine:<br>1,750,980<br>P-yr postvaccine:<br>5,555,420   | ICD-9 codes 078.10,<br>078.11 OR prescription of<br>Imiquimod or<br>Podophyllotoxin                                                                                                                                                                               | Annual proportion<br>of PACT clients<br>diagnosed with<br>AGW           | RR of AGW<br>proportion<br>(crude)               |
| Cocchio 2017<br>(Italy) <sup>41</sup>                          | Quadrivalent | Population-based:<br>Hospital records of<br>all Veneto residents<br>(public & private)                                               | Entire population from<br>Veneto, Italy                                                                                         | Females and males<br>15-39 yrs                                                                        | 2004-2015<br>Prevaccine:2006-2008<br>Postvaccine:2009-2015  | P-yr prevaccine:<br>4,567,864<br>P-yr postvaccine:<br>9,913,192   | ICD-9 code 078.11 and 1<br>ICD-9 surgical code (70-<br>71, 58, 64, 58.3, 49)                                                                                                                                                                                      | Annual rate of<br>hospitalization for<br>AGW in the<br>population       | RR of AGW<br>hospitalization<br>(crude)          |
| Dominiak-Felden<br>2015 (Belgium) <sup>42</sup>                | Quadrivalent | Health provider<br>/insurance-based:<br>Medical claims,<br>National Union of<br>Independent Sick<br>Funds (MLOZ)                     | Enrollees in MLOZ, one<br>of the 3 biggest sick fund<br>in Belgium (18% of the<br>Belgium population; 2<br>million individuals) | Females and<br>males<br>15-39 yrs                                                                     | 2006-2013<br>Prevaccine:2006-2007<br>Postvaccine:2008-2013  | P-yr prevaccine:<br>960,777<br>P-yr postvaccine:<br>3,858,172     | First prescription of<br>Imiquimod with a level of<br>reimbursement specific for<br>AGW onset                                                                                                                                                                     | RR of AGW<br>incidence (crude)                                          | RR of AGW<br>incidence<br>(crude)                |
| Flagg 2013/Flagg<br>2018<br>(USA) <sup>43, 44</sup>            | Quadrivalent | Health provider<br>/insurance-based:<br>Truven Health<br>Analytics Market<br>Scan Commercial<br>Claims and<br>Encounters<br>Database | Enrollees in<br>approximately 100<br>health private insurance<br>plans across the U.S.<br>aged 10-39 yrs                        | Females and<br>males<br>15-39 yrs,<br>Insured<br>employees, early<br>retirees and their<br>dependents | 2003-2014<br>Prevaccine: 2004-2006<br>Postvaccine:2007-2014 | P-yr prevaccine:<br>11,864,207<br>P-yr postvaccine:<br>85,817,435 | 1) ICD-9 codes 078.11 OR 3<br>ICD-9 code 078.1, 078.10, c<br>078.19 <u>and</u> therapeutic<br>procedure diagnosis of<br>benign AG neoplasm OR 3)<br>≥1 prescription for AGW<br>treatment <u>and</u> therapeutic<br>procedure r diagnosis of<br>benign AG neoplasm | Annual<br>proportion of<br>insured<br>individuals with<br>diagnosed AGW | RR of AGW<br>proportion<br>(crude)               |
| Guerra 2016<br>(Canada-Ontario) <sup>45</sup>                  | Quadrivalent | Population-based:<br>Health care<br>encounter database<br>(covers all Ontario<br>residents)                                          | All Ontario residents<br>aged ≥ 15 yrs with a<br>valid health card number                                                       | Females and<br>males<br>15-26 yrs                                                                     | 2004-2013<br>Prevaccine:2005-2007<br>Postvaccine:2008-2013  | P-yr prevaccine:<br>6,242,786<br>P-yr postvaccine:<br>13,069,534  | First physician office visit<br>(12-month wash-out<br>period) with one of 10<br>possible combination<br>codes: 099 + Z117, 079 +<br>Z117, 629 + Z117, Z549,<br>Z758, Females: Z733,<br>Z736, or Z769; males<br>Z767, Z701                                         | Annual<br>incidence rate of<br>diagnosed AGW<br>in the population       | RR of AGW<br>incidence<br>(crude)                |
| Harrison 2014 <sup>¶</sup><br>(Australia) <sup>46</sup>        | Quadrivalent | Clinic-based<br>(BEACH program:<br>randomly selected<br>GP-encounters in<br>Australia)                                               | Patients of 1,000<br>randomly selected GP<br>across Australia (each<br>year)                                                    | Females and<br>males<br>15-39 yrs                                                                     | 2002-2015<br>Prevaccine:2005-2007<br>Postvaccine:2008-2015  | P-yr prevaccine:<br>77,258<br>P-yr postvaccine:<br>190,268        | ICPC 2 code Y76 (males),<br>X91 (females)                                                                                                                                                                                                                         | Annual<br>proportion of<br>patients with<br>AGW<br>management           | RR of AGW<br>management<br>proportion<br>(crude) |

| Author (Country)                                                          | Vaccine                                                                              | Data source*                                                                                           | Study population                                                                                                         | Population used in meta-analysis               | Data collection dates <sup>†</sup>                          | Sample size used in meta-analysis <sup>‡</sup>                    | Case definition                                                                                                                                                                                           | Effect measure in publication                                                        | Effect measure recalculated <sup>B</sup> |
|---------------------------------------------------------------------------|--------------------------------------------------------------------------------------|--------------------------------------------------------------------------------------------------------|--------------------------------------------------------------------------------------------------------------------------|------------------------------------------------|-------------------------------------------------------------|-------------------------------------------------------------------|-----------------------------------------------------------------------------------------------------------------------------------------------------------------------------------------------------------|--------------------------------------------------------------------------------------|------------------------------------------|
| Howell-Jones 2013/<br>Canvin 2017<br>(England) <sup>47,48</sup>           | Bivalent<br>Quadrivalent<br>for some girls<br>15-16 yrs in<br>2014-2015 <sup>a</sup> | Population-based:<br>Office for National<br>Statistics,<br>Genitourinary<br>medicine (GUM)<br>clinics  | Entire population of<br>England aged 15-24 yrs;                                                                          | Females and<br>males<br>15-24 yrs              | 2002-2015<br>Prevaccine: 2006-2008<br>Postvaccine:2009-2015 | P-yr prevaccine:<br>20,370,695<br>P-yr postvaccine:<br>48,041,371 | Clinical diagnosis                                                                                                                                                                                        | Annual<br>incidence rate of<br>diagnosed AGW<br>in the population                    | RR of AGW<br>incidence<br>(crude)        |
| Kliwewer 2012/<br>Thompson 2016<br>(Canada-<br>Manitoba) <sup>49,50</sup> | Quadrivalent                                                                         | Population-based:<br>Medical claims and<br>hospital discharge<br>database of all<br>Manitoba residents | Entire population of<br>Manitoba                                                                                         | Females and<br>males<br>15-39 yrs              | 2006-2011<br>Prevaccine: 2006-2008<br>Postvaccine:2009-2011 | P-yr prevaccine:<br>1,194,786<br>P-yr postvaccine:<br>1,245,073   | Treatments (1 of 14 tariff<br>codes) OR<br>(hospitalization for AGW<br>+ ICD-9 code 078.11) OR<br>(078.1, 078.10, 078.19<br>and related procedure)<br>OR ICD-10 A630 OR<br>(B07 and related<br>procedure) | Annual<br>incidence rate of<br>diagnosed AGW<br>in the population                    | RR of AGW<br>incidence<br>(crude)        |
| Leval 2012/<br>Herweijer 2018<br>(Sweden) <sup>51,52</sup>                | Quadrivalent                                                                         | Population-based:<br>Statistics Sweden,<br>National Patient<br>Register, Prescribed<br>Drug Register   | Entire population of<br>Sweden aged $\geq 10$ yrs                                                                        | Females and<br>males<br>15-39 yrs              | 2006-2012<br>Prevaccine: 2006<br>Postvaccine:2007-2012      | P-yr prevaccine:<br>2,930,263<br>P-yr postvaccine:<br>18,089,134  | ICD-10 code A63.0 OR<br>prescription of<br>Imiquimod or<br>Podophyllotoxin                                                                                                                                | Annual incidence<br>rate of diagnosed<br>AGW in the<br>population                    | RR of AGW<br>incidence<br>(crude)        |
| Liu 2014<br>(Australia) <sup>53</sup>                                     | Quadrivalent                                                                         | Population-based:<br>Australia-wide<br>survey                                                          | All Australian women<br>aged 18-39 yrs                                                                                   | Females<br>18-39 yrs                           | 2001 and 2011<br>Prevaccine:2001<br>Postvaccine:2011        | P-yr prevaccine:<br>4,874<br>P-yr postvaccine:<br>2,394           | Self-reported AGW<br>diagnosis (ever had<br>AGW)                                                                                                                                                          | Proportion of<br>women reporting<br>AGW among all<br>respondents                     | RR of AGW<br>proportion<br>(crude)       |
| Mikolajczyk 2013/<br>Thönes 2017<br>(Germany) <sup>54,55</sup>            | Quadrivalent                                                                         | Health provider<br>/insurance-based:<br>German Pharmaco-<br>epidemiological<br>Research Database       | Enrollees in 1 large<br>health insurance<br>company across<br>Germany aged 10-79 yrs                                     | Females and<br>males<br>15-39 yrs              | 2005-2010<br>Prevaccine: 2005-2007<br>Postvaccine:2008-2010 | P-yr prevaccine:<br>4,974,000<br>P-yr postvaccine:<br>5,372,000   | ICD-10 code A63.0                                                                                                                                                                                         | Annual<br>incidence rate of<br>diagnosed AGW<br>among insured<br>individuals         | RR of AGW<br>incidence<br>(crude)        |
| Oliphant 2011/2017<br>(New Zealand) <sup>56,57</sup>                      | Quadrivalent                                                                         | Clinic-based: STI<br>clinic                                                                            | New clients of 4 sexual<br>health service in<br>Auckland aged $\geq 10$ yrs                                              | Females and<br>males<br>15-39 yrs              | 2007-2013<br>Prevaccine:2007-2008<br>Postvaccine:2009-2013  | P-yr prevaccine:<br>9,559<br>P-yr postvaccine:<br>26,258          | Clinical diagnosis                                                                                                                                                                                        | Annual<br>proportion of<br>new clients<br>diagnosed with<br>AGW                      | RR of AGW<br>proportion<br>(crude)       |
| Smith 2015/2016<br>(Australia) <sup>58,59</sup>                           | Quadrivalent                                                                         | Population-based:<br>National Hospital<br>Morbidity Database,<br>Australian Bureau of<br>Statistics    | Entire population of<br>Australia aged 12-69 yrs                                                                         | Females and<br>males<br>12-69 yrs <sup>v</sup> | 2005-2011<br>Prevaccine:2005-2007<br>Postvaccine:2008-2011  | P-yr prevaccine:<br>45,887,699<br>P-yr postvaccine:<br>65,192,250 | Hospitalization including<br>ICD-10 code A63.0 as<br>main or contributory<br>diagnosis                                                                                                                    | Annual rate of<br>hospitalization<br>with AGW<br>diagnosis in the<br>population      | RR of AGW<br>hospitalization<br>(crude)  |
| Sonnenberg 2017 <sup>60</sup>                                             | Bivalent                                                                             | Population-based:<br>Natsal participants                                                               | Nationally representative<br>sample of males and<br>females aged 16-44 yrs<br>Natsal-2, 16-74 yrs<br>Natsal-3 in Britain | Females and<br>males<br>16-39 yrs              | Prevaccine:1999-2001<br>Postvaccine:2010-2012               | N prevaccine:8,294<br>N postvaccine:5,849                         | Ever having a diagnosis<br>of AGW (self-reported)                                                                                                                                                         | Proportion of the<br>population who<br>reported ever<br>having a diagnosis<br>of AGW | RR of AGW<br>proportion<br>(crude)       |

| Author (Country)                                                                       | Vaccine      | Data source*                                                                                                    | Study population                                                                                                                                                                     | Population used in meta-analysis        | Data collection dates <sup>†</sup>                              | Sample size used in meta-analysis <sup>‡</sup>              | Case definition                                                                                                                    | Effect measure in publication                                    | Effect measure recalculated <sup>§</sup> |
|----------------------------------------------------------------------------------------|--------------|-----------------------------------------------------------------------------------------------------------------|--------------------------------------------------------------------------------------------------------------------------------------------------------------------------------------|-----------------------------------------|-----------------------------------------------------------------|-------------------------------------------------------------|------------------------------------------------------------------------------------------------------------------------------------|------------------------------------------------------------------|------------------------------------------|
| Steben 2018 <sup>61</sup>                                                              | Quadrivalent | Health provider /insurance-based : Quebec physician claim and public drug insurance databases                   | Individuals covered by the Quebec public drug insurance                                                                                                                              | Females and males 15- ≥30 yrs           | 2004-2012<br>Prevaccine:2004-2007<br>Postvaccine:2009-2012      | P-yr prevaccine: 13,159,362<br>P-yr postvaccine: 13,241,313 | ICD-9 code 078.1OR medical procedure specific to condyloma (05314, 06169) OR dispensation of podofilox, imiquimod, or fluorouracil | Annual incidence rate of diagnosed AGW among insured individuals | RR of AGW incidence (crude)              |
| Woestenberg 2017 (Netherlands) <sup>62</sup>                                           | Bivalent     | Clinic-based PASSYON study in STI clinics                                                                       | Patients of STI clinics aged 16-24 yrs old across the Netherlands                                                                                                                    | Females and males 16-24 yrs             | 2009, 2011, 2013<br>Prevaccine: 2009<br>Postvaccine: 2011, 2013 | P-yr prevaccine: 1,662<br>P-yr postvaccine: 3,859           | Clinical diagnosis                                                                                                                 | Proportion of STI patients diagnosed with AGW                    | RR of AGW proportion (adjusted)          |
| <b>Cervical intraepithelial neoplasia grade 2+</b>                                     |              |                                                                                                                 |                                                                                                                                                                                      |                                         |                                                                 |                                                             |                                                                                                                                    |                                                                  |                                          |
| Baldur-Felskov 2014/2015 (Denmark) <sup>63, 64</sup>                                   | Quadrivalent | Population-based: Nationwide Danish Pathology Data Bank                                                         | Females aged ≥ 12 yrs living in Denmark and screened for cervical cancer                                                                                                             | Screened females 15-39 yrs              | 2007-2013<br>Prevaccine:2007-2009<br>Postvaccine:2010-2013      | P-yr prevaccine: 1,810,881<br>P-yr postvaccine: 1,840,066   | Histopathologically confirmed CIN2+                                                                                                | Annual incidence of CIN2+ among screened females                 | RR of CIN2+ incidence (crude)            |
| Benard 2017 (USA) <sup>65</sup>                                                        | Quadrivalent | Population-based: New Mexico HPV pap registry                                                                   | Females aged 15-29 yrs living in New Mexico and screened for cervical cancer                                                                                                         | Screened females 15-29 yrs              | 2007-2014<br>Prevaccine:2007<br>Postvaccine:2008-2014           | P-yr prevaccine: 74,115<br>P-yr postvaccine: 386,146        | Histopathologically confirmed CIN2+                                                                                                | Annual incidence of CIN2+ among screened females                 | RR of CIN2+ incidence (crude)            |
| Brotherton 2011/ AIHW 2016/2018 (Australia) <sup>66-68</sup>                           | Quadrivalent | Population-based: Cervical cancer screening program registry                                                    | Females aged <69 yrs living in Australia and screened for cervical cancer                                                                                                            | Screened females 15-39 yrs              | 2005-2016<br>Prevaccine:2005-2007<br>Postvaccine:2008-2016      | P-yr prevaccine: 3,213,016<br>P-yr postvaccine: 9,200,381   | Histopathologically confirmed CIN2+                                                                                                | Annual incidence of CIN2+ among screened females                 | RR of CIN2+ incidence (crude)            |
| Flagg 2016 (USA) <sup>69</sup>                                                         | Quadrivalent | Health provider /insurance-based: Truven Health Analytics Market Scan Commercial Claims and Encounters Database | Females aged 15-39 yrs, enrolled in 100-170 employers and health private insurance plans across USA and screened for cervical cancer                                                 | Screened females 15-39 yrs              | 2007-2014<br>Prevaccine:2007<br>Postvaccine:2008-2014           | P-yr prevaccine: 1,542,598<br>P-yr postvaccine: 15,643,924  | Histopathologically confirmed CIN2+ (ICD-9 code 622.12, 233.1)                                                                     | Annual prevalence of CIN2+ among screened females                | RR of CIN2+ proportion (crude)           |
| Gargano 2018 (USA- California, Connecticut, New York, Oregon, Tennessee) <sup>70</sup> | Quadrivalent | Population-based: HPV-IMPACT surveillance system. Number of screened women estimated from different sources     | Females aged 18-39 yrs with a high-grade lesion in HPV-IMPACT (a laboratory-based surveillance system including areas from California, Connecticut, New York, Oregon, and Tennessee) | Screened females 18-39 yrs <sup>§</sup> | 2008-2015<br>Prevaccine:2008<br>Postvaccine:2009-2015           | P-yr prevaccine: 268,186<br>P-yr postvaccine: 1,470,273     | Histopathologically confirmed CIN2+                                                                                                | Annual incidence of CIN2+ among screened females                 | RR of CIN2+ incidence (crude)            |



| Author (Country)                                                     | Vaccine      | Data source*                                                                                                                     | Study population                                                                                 | Population used in meta-analysis           | Data collection dates <sup>†</sup>                         | Sample size used in meta-analysis <sup>‡</sup>            | Case definition                     | Effect measure in publication                      | Effect measure recalculated <sup>§</sup>                        |
|----------------------------------------------------------------------|--------------|----------------------------------------------------------------------------------------------------------------------------------|--------------------------------------------------------------------------------------------------|--------------------------------------------|------------------------------------------------------------|-----------------------------------------------------------|-------------------------------------|----------------------------------------------------|-----------------------------------------------------------------|
| Niccolai 2013/2017 (USA- Connecticut) <sup>71, 72</sup> <sup>ε</sup> | Quadrivalent | Population-based: Connecticut surveillance system (all 34 pathology laboratories). Number of screened women estimated from BRFSS | Females aged 21-39 yrs living in Connecticut with a high-grade lesion in the surveillance system | Screened females 20-39 yrs <sup>ε, ϑ</sup> | 2008-2014<br>Prevaccine:2008<br>Postvaccine:2009-2014      | P-yr prevaccine: 211,134<br>P-yr postvaccine: 643,071     | Histopathologically confirmed CIN2+ | Annual incidence of CIN2+ among general population | RR of CIN2+ incidence among screened women <sup>ϑ</sup> (crude) |
| Nygård 2017 (via Liaw 2014) (Norway) <sup>73 ϑ</sup>                 | Quadrivalent | Population-based: Norwegian cervical cancer screening program registry                                                           | All females living in Norway and screened for cervical cancer                                    | Screened females 15-39 yrs                 | 2007-2014<br>Prevaccine:2007-2009<br>Postvaccine:2010-2014 | P-yr prevaccine: 1,262,014<br>P-yr postvaccine: 1,948,739 | Histopathologically confirmed CIN2+ | Annual incidence of CIN2+ among screened females   | RR of CIN2+ incidence (crude)                                   |
| Ogilvie 2015 (Canada-British Columbia) <sup>74</sup>                 | Quadrivalent | Population-based: BC Cervical cancer screening program registry                                                                  | Females aged 15-22 yrs living in British-Columbia (Canada) and screened for cervical cancer      | Screened females 15-17 yrs <sup>¶</sup>    | 2006-2012<br>Prevaccine:2006-2008<br>Postvaccine:2009-2012 | P-yr prevaccine: 27,523<br>P-yr postvaccine: 27,054       | Histopathologically confirmed CIN2+ | Annual incidence of CIN2+ among screened females   | RR of CIN2+ incidence (crude)                                   |
| Pollock 2014 (Scotland) <sup>75</sup>                                | Bivalent     | Population-based: Scottish Cervical cancer screening program registry                                                            | Females aged 20-21 yrs living in Scotland and screened for cervical cancer                       | Screened females 20-21 yrs                 | 2008-2014<br>Prevaccine:2008<br>Postvaccine:2008-2014      | P-yr prevaccine: 20,891<br>P-yr postvaccine: 111,230      | Histopathologically confirmed CIN2+ | Annual incidence of CIN2+ among screened females   | RR of CIN2+ incidence (crude)                                   |

AGW: Anogenital warts; AIHW: Australian Institute of Health and Welfare; BRFSS: Behavioral Risk Factor Surveillance System; NHANES: National Health and Nutrition Examination Survey; NATSAL: National Survey of Sexual Attitudes and Lifestyles; OR: Odds ratio; RR: Relative risk (Post-vaccination prevalence or incidence / Pre-vaccination prevalence or incidence); STI: Sexually transmitted infection; GP: General practitioner

\* Data sources are considered as: 1) Population-based when the study population includes the total population of a given country/region or a registry, 2) Health provider/insurance-based when the study population is constituted of a subgroup of the total population enrolled in a specific insurance plan, 3) Clinic-based when the study population is constituted of individuals who received health services (e.g., medical consultation).

† For studies on HPV infection, the pre- and post-vaccination periods were already determined in most original publications (except for Kavanagh et al.). For studies on AGW and cervical lesions studies, the pre- and post-vaccination periods were determined for the purposes of this systematic review as described in the Appendix-Table S8.

‡ The sample size is restricted to the age groups used in the review. For studies on HPV infection, the pre and post-vaccination sample sizes were already determined in original studies. For studies on AGW and cervical lesions, the pre-vaccination sample size corresponds to the cumulative number of person-years up to three years pre-vaccination. The post-vaccination sample size corresponds to the cumulative number of person-years from 1 to 8 years after the introduction of vaccination, depending on data available in each study.

§ For HPV infection, the investigators recalculated the RR (adjusted or crude) of prevalence using the original data from their specific studies. For AGW and precancerous lesions, we estimated pre-vaccination frequency by aggregating the data for up to three years prior to vaccination, and calculated RR by dividing each post-vaccination year by the pre-vaccination estimate.

\*\* The study by Dillner et al. included data from Denmark, Sweden and Norway among women aged  $\geq 18$  years in 2012-2013. However, since the vaccination program of 12 year-old girls began in 2009 in Norway, women included in the study ( $\geq 18$  years old) were too old to be covered by the vaccination program (vaccination coverage < 2%). For this reason, we did not include data from Norway in the meta-analysis.

- Ω Since only oral infections were available for males, we did not include data for males from this study in our meta-analysis.
- γ The pre-vaccine sample excludes 65 women who were vaccinated (10.6% of the sample). The prevalence of all HPV types, HPV 16/18, and other common HPV types did not statistically differ between the vaccinated and unvaccinated women of the pre-vaccination sample (unpublished data).
- Ⓕ The study by Machalek includes a subset of women included in the studies by Tabrizi and a group of women aged 25-35 years (not previously included in Tabrizi). To avoid double counting the same women, we only kept the results from the older group of women not previously included in Tabrizi.
- Ⓖ 13 HR-HPV types were presented in the original publications whereas the 18 HR-HPV types available were used for the purposes of this meta-analysis
- Ⓢ Published data were available until 2012, but the author provided data up to 2015.
- α In 2014: 14% and 72% of 15 yr old girls received the quadrivalent and bivalent vaccine, respectively. In 2015, 57% and 29% of 15 yr old girls received the quadrivalent and bivalent vaccine, respectively; 14% and 57% of 16 yr old girls received the quadrivalent and bivalent vaccine, respectively.
- Ⓝ Permission could not be obtained from the data custodian to release data in the age strata requested for this meta-analysis, therefore results for age groups 15-19, 20-24, 25-29 and 30-39 years in this meta-analysis used published data from the age groups 12-17, 18-26, 27-30 and 31-69 years, respectively, as reported in Smith 2015.<sup>58</sup>
- § Data from Brotherton et al. 2011<sup>66</sup> are restricted to the Victorian registry data. Supplementary data from the Australian Institute of Health and Welfare 2016 report were provided by Dr. Brotherton. Since the report covers all regions of Australia, it was used as our main data source for the review.
- £ The number of screened women is not directly available in these studies. Different data sources (individual or aggregate-level) have been used to estimate the denominator (i.e., the number of screened women of the different catchment areas).
- € One county from Connecticut (New Haven) is included in the HPV-IMPACT surveillance system. To avoid double counting women from this county in estimates from HPV-IMPACT (Gargano 2018) and Connecticut (Niccolai 2017), we decided with the authors, to excluded New Haven from the Connecticut data to keep them in HPV-IMPACT.
- ⊘ The study population in the original publication was restricted to women aged 21-39 years, but data for women aged 20 years were provided for this meta-analysis
- ⊙ For the purposes of this meta-analysis, the rates were recalculated using estimates of number of screened women from the Behavioral Risk Factor Surveillance System (BRFSS).
- Ⓢ CIN2+ data from Norway were identified in the article by Liaw et al<sup>73</sup> and were provided by Mari Nygård (personal communication)
- Ⓢ Data directly available in the article to estimate RR of CIN2+ incidence among screened females available only for females ages 15-17 years old.

**Table S11. Subgroup analyses of the changes in prevalence of HPV infection between the pre- and post-vaccination periods (1-4 yrs and 5-8 yrs) among girls/women.**

| Study characteristics                 | 15-19 years                       |                                   | 20-24 years                        |                                   | 25-29 years                       |                                   |
|---------------------------------------|-----------------------------------|-----------------------------------|------------------------------------|-----------------------------------|-----------------------------------|-----------------------------------|
|                                       | 1-4 yrs                           | 5-8 yrs                           | 1-4 yrs                            | 5-8 yrs                           | 1-4 yrs                           | 5-8 yrs                           |
|                                       | RR [95% CI]<br><i>p-value*</i>    | RR [95% CI]<br><i>p-value*</i>    | RR [95% CI]<br><i>p-value*</i>     | RR [95% CI]<br><i>p-value*</i>    | RR [95% CI]<br><i>p-value*</i>    | RR [95% CI]<br><i>p-value*</i>    |
| <b>HPV16/18</b>                       |                                   |                                   |                                    |                                   |                                   |                                   |
| Vaccine                               |                                   |                                   |                                    |                                   |                                   |                                   |
| Quadrivalent (n=11)                   | 0.23 [0.13;0.41]                  | 0.21 [0.13;0.36]                  | 0.55 [0.42;0.73]                   | 0.27 [0.17;0.42]                  | 0.87 [0.68;1.12]                  | 0.68 [0.43;1.06]                  |
| Bivalent (n=3)                        | 0.42 [0.36;0.49]<br><i>p=0.05</i> | 0.14 [0.11;0.18]<br><i>p=0.16</i> | 0.80 [0.60;1.06]<br><i>p=0.06</i>  | 0.46 [0.23;0.94]<br><i>p=0.21</i> | 0.81 [0.48;1.38]<br><i>p=0.80</i> | 0.31 [0.08;1.22]<br><i>p=0.29</i> |
| Study and age-specific coverage †     |                                   |                                   |                                    |                                   |                                   |                                   |
| Low (<50%) (n=1 / n=6 / n=7)          | 0.50 [0.34;0.74]                  | 0.28 [0.14;0.56]                  | 0.80 [0.66;0.97]                   | 0.42 [0.28;0.64]                  | 0.87 [0.68;1.12]                  | 0.67 [0.53;0.83]                  |
| High (≥50%) (n=10/ n= 6 / n=1)        | 0.28 [0.19;0.41]<br><i>p=0.04</i> | 0.15 [0.11;0.21]<br><i>p=0.12</i> | 0.43 [0.28;0.65]<br><i>p=0.01</i>  | 0.27 [0.24;0.31]<br><i>p=0.05</i> | NA                                | 0.08 [0.01;0.62]<br><i>p=0.04</i> |
| Effect measure                        |                                   |                                   |                                    |                                   |                                   |                                   |
| Adjusted (n=6)                        | 0.33 [0.21;0.52]                  | 0.17 [0.11;0.26]                  | 0.68 [0.43;1.08]                   | 0.35 [0.19;0.62]                  | 0.89 [0.30;2.62]                  | 0.54 [0.23;1.25]                  |
| Unadjusted (n=8)                      | 0.18 [0.06;0.58]<br><i>p=0.34</i> | 0.17 [0.02;1.27]<br><i>p=1.00</i> | 0.60 [0.51;0.71]<br><i>p=0.61</i>  | 0.31 [0.22;0.46]<br><i>p=0.78</i> | 0.80 [0.67;0.95]<br><i>p=0.85</i> | 0.63 [0.49;0.81]<br><i>p=0.73</i> |
| Data source ‡                         |                                   |                                   |                                    |                                   |                                   |                                   |
| Population-based (n=2)                | 0.47 [0.34;0.67]                  | 0.28 [0.14;0.56]                  | 0.98 [0.72;1.33]                   | 0.38 [0.22;0.65]                  | 1.04 [0.67;1.62]                  | 0.83 [0.50;1.38]                  |
| Health provider/insurance-based (n=0) | NA                                | NA                                | NA                                 | NA                                | NA                                | NA                                |
| Clinic-based (n=12)                   | 0.26 [0.17;0.40]<br><i>p=0.04</i> | 0.15 [0.11;0.21]<br><i>p=0.12</i> | 0.59 [0.49;0.71]<br><i>p=0.006</i> | 0.33 [0.22;0.50]<br><i>p=0.67</i> | 0.80 [0.65;0.98]<br><i>p=0.28</i> | 0.51 [0.25;1.05]<br><i>p=0.28</i> |
| <b>HPV types 31/33/45</b>             |                                   |                                   |                                    |                                   |                                   |                                   |
| Vaccine                               |                                   |                                   |                                    |                                   |                                   |                                   |
| Quadrivalent (n=11)                   | 0.93 [0.79;1.08]                  | 0.50 [0.30;0.82]                  | 1.03 [0.86;1.24]                   | 0.74 [0.58;0.94]                  | 0.98 [0.75;1.28]                  | 0.92 [0.70;1.21]                  |
| Bivalent (n=3)                        | 0.81 [0.65;1.01]<br><i>p=0.34</i> | 0.29 [0.06;1.30]<br><i>p=0.50</i> | 0.91 [0.64;1.29]<br><i>p=0.52</i>  | 0.68 [0.29;1.59]<br><i>p=0.87</i> | 1.61 [0.68;3.83]<br><i>p=0.28</i> | 1.14 [0.37;3.49]<br><i>p=0.71</i> |
| Study and age-specific coverage †     |                                   |                                   |                                    |                                   |                                   |                                   |
| Low (<50%) (n=1 / n=6 / n=7)          | NA                                | 0.71 [0.29;1.75]                  | 1.07 [0.89;1.28]                   | 0.92 [0.68;1.24]                  | 0.98 [0.75;1.28]                  | 0.93 [0.71;1.23]                  |
| High (≥50%) (n=10/ n= 6 / n=1)        | 0.89 [0.78;1.01]                  | 0.44 [0.30;0.64]<br><i>p=0.34</i> | 0.88 [0.68;1.14]<br><i>p=0.23</i>  | 0.59 [0.34;1.03]<br><i>p=0.17</i> | NA                                | 0.91 [0.30;2.75]<br><i>p=0.97</i> |
| Effect measure                        |                                   |                                   |                                    |                                   |                                   |                                   |
| Adjusted (n=6)                        | 0.81 [0.66;0.99]                  | 0.45 [0.33;0.61]                  | 1.11 [0.86;1.44]                   | 0.91 [0.69;1.19]                  | 0.65 [0.15;2.70]                  | 1.15 [0.68;1.93]                  |
| Unadjusted (n=8)                      | 0.91 [0.72;1.15]<br><i>p=0.44</i> | 0.89 [0.30;2.66]<br><i>p=0.24</i> | 0.93 [0.76;1.13]<br><i>p=0.28</i>  | 0.60 [0.33;1.07]<br><i>p=0.20</i> | 1.01 [0.89;1.15]<br><i>p=0.54</i> | 0.86 [0.63;1.18]<br><i>p=0.36</i> |

| Study characteristics                        | 15-19 years                        |                                     | 20-24 years                       |                                   | 25-29 years                       |                                     |
|----------------------------------------------|------------------------------------|-------------------------------------|-----------------------------------|-----------------------------------|-----------------------------------|-------------------------------------|
|                                              | 1-4 yrs                            | 5-8 yrs                             | 1-4 yrs                           | 5-8 yrs                           | 1-4 yrs                           | 5-8 yrs                             |
|                                              | RR [95% CI]<br><i>p-value</i> *    | RR [95% CI]<br><i>p-value</i> *     | RR [95% CI]<br><i>p-value</i> *   | RR [95% CI]<br><i>p-value</i> *   | RR [95% CI]<br><i>p-value</i> *   | RR [95% CI]<br><i>p-value</i> *     |
| Data source <sup>§</sup>                     |                                    |                                     |                                   |                                   |                                   |                                     |
| Population-based (n=2)                       | NA                                 | 0.71 [0.29;1.75]                    | 0.92 [0.63;1.35]                  | 0.60 [0.26;1.39]                  | 1.22 [0.77;1.93]                  | 1.25 [0.60;2.59]                    |
| Health provider/insurance-based (n=0)        | NA                                 | NA                                  | NA                                | NA                                | NA                                | NA                                  |
| Clinic-based (n=12)                          | 0.89 [0.78;1.00]                   | 0.44 [0.30;0.64]<br><i>p=0.34</i>   | 1.00 [0.84;1.20]<br><i>p=0.71</i> | 0.73 [0.46;1.15]<br><i>p=0.69</i> | 0.95 [0.69;1.32]<br><i>p=0.40</i> | 0.89 [0.66;1.18]<br><i>p=0.39</i>   |
| <b>High-risk HPV types (except 16/18)</b>    |                                    |                                     |                                   |                                   |                                   |                                     |
| Vaccine                                      |                                    |                                     |                                   |                                   |                                   |                                     |
| Quadrivalent (n=11)                          | 1.08 [0.96;1.22]                   | 0.95 [0.76;1.18]                    | 1.07 [0.98;1.16]                  | 1.07 [0.92;1.24]                  | 1.00 [0.89;1.11]                  | 1.10 [0.69;1.77]                    |
| Bivalent (n=3)                               | 1.38 [1.11;1.70]<br><i>p=0.06</i>  | 1.55 [1.41;1.71]<br><i>p=0.0001</i> | 1.23 [0.92;1.65]<br><i>p=0.36</i> | 1.37 [0.81;2.32]<br><i>p=0.37</i> | 1.13 [0.76;1.67]<br><i>p=0.55</i> | 1.46 [0.85;2.51]<br><i>p=0.45</i>   |
| Study and age-specific coverage <sup>¥</sup> |                                    |                                     |                                   |                                   |                                   |                                     |
| Low (<50%) (n=1 / n=6 / n=7)                 | 0.79 [0.60;1.04]                   | 0.83 [0.63;1.09]                    | 1.22 [1.03;1.45]                  | 1.26 [0.92;1.73]                  | 1.00 [0.89;1.11]                  | 1.33 [0.93;1.91]                    |
| High (≥50%) (n=10/ n= 6 / n=1 )              | 1.19 [1.05;1.35]<br><i>p=0.007</i> | 1.20 [0.86;1.67]<br><i>p=0.09</i>   | 1.01 [0.91;1.12]<br><i>p=0.06</i> | 1.03 [0.84;1.28]<br><i>p=0.31</i> | NA                                | 0.67 [0.39;1.16]<br><i>p=0.04</i>   |
| Effect measure                               |                                    |                                     |                                   |                                   |                                   |                                     |
| Adjusted (n=6)                               | 1.04 [0.79;1.37]                   | 1.06 [0.75;1.50]                    | 1.22 [1.00;1.49]                  | 1.21 [0.85;1.73]                  | 1.09 [0.86;1.39]                  | 1.00 [0.75;1.34]                    |
| Unadjusted (n=8)                             | 1.14 [1.07;1.23]<br><i>p=0.50</i>  | 1.55 [0.97;2.49]<br><i>p=0.20</i>   | 1.05 [0.99;1.11]<br><i>p=0.15</i> | 1.08 [0.87;1.34]<br><i>p=0.58</i> | 0.99 [0.88;1.11]<br><i>p=0.47</i> | 1.73 [1.54;1.95]<br><i>p=0.0005</i> |
| Data source <sup>§</sup>                     |                                    |                                     |                                   |                                   |                                   |                                     |
| Population-based (n=2)                       | 0.84 [0.66;1.08]                   | 0.83 [0.63;1.09]                    | 1.14 [0.93;1.39]                  | 1.04 [0.78;1.39]                  | 1.14 [0.89;1.46]                  | 0.98 [0.72;1.34]                    |
| Health provider/insurance-based (n=0)        | NA                                 | NA                                  | NA                                | NA                                | NA                                | NA                                  |
| Clinic-based (n=12)                          | 1.20 [1.05;1.36]<br><i>p=0.01</i>  | 1.20 [0.86;1.67]<br><i>p=0.09</i>   | 1.11 [0.98;1.25]<br><i>p=0.83</i> | 1.18 [0.92;1.52]<br><i>p=0.52</i> | 0.98 [0.86;1.11]<br><i>p=0.27</i> | 1.23 [0.78;1.94]<br><i>p=0.42</i>   |

RR = Relative Risk: HPV prevalence in the post-vaccination periods (1-4 yrs or 5-8 yrs) compared to the pre-vaccination period.

CI = Confidence Interval.

\* *p*-values indicate the statistical significance of comparisons between subgroups of studies.

¥ The vaccination coverage for at least one dose of studies of HPV infection is available directly for study participants. The age-specific vaccination coverage varies greatly between the different age groups. For this reason, we indicate the number of studies in each vaccination coverage category for girls aged 13-19 years old / women 20-24 years old / women 25-29 years old.

§ Studies using health provider/insurance based data and studies using clinic-based data were compared to studies using population-based data.

**Table S12. Subgroup analyses of the changes in anogenital warts (AGW) diagnosis between the pre- and post-vaccination periods (1-4 yrs and 5-8 yrs) among girls/women and boys/men.**

**A) Girls/women**

| Study characteristics                                                     | 15-19 years                             |                                         | 20-24 years                             |                                        | 25-29 years                        |                                    | 30-39 years                       |                                   |
|---------------------------------------------------------------------------|-----------------------------------------|-----------------------------------------|-----------------------------------------|----------------------------------------|------------------------------------|------------------------------------|-----------------------------------|-----------------------------------|
|                                                                           | 1-4 yrs                                 | 5-8 yrs                                 | 1-4 yrs                                 | 5-8 yrs                                | 1-4 yrs                            | 5-8 yrs                            | 1-4 yrs                           | 5-8 yrs                           |
|                                                                           | RR [95% CI]<br><i>p-value</i> *         | RR [95% CI]<br><i>p-value</i> *         | RR [95% CI]<br><i>p-value</i> *         | RR [95% CI]<br><i>p-value</i> *        | RR [95% CI]<br><i>p-value</i> *    | RR [95% CI]<br><i>p-value</i> *    | RR [95% CI]<br><i>p-value</i> *   | RR [95% CI]<br><i>p-value</i> *   |
| <b>Vaccine</b>                                                            |                                         |                                         |                                         |                                        |                                    |                                    |                                   |                                   |
| Quadrivalent (n=15)                                                       | 0.60 [0.47;0.76]                        | 0.33 [0.24;0.46]                        | 0.76 [0.67;0.86]                        | 0.46 [0.36;0.60]                       | 0.89 [0.80;0.98]                   | NA                                 | 1.02 [0.93;1.13]                  | NA                                |
| Bivalent (n=3)                                                            | 0.91 [0.89;0.92]<br><i>p=0.001</i>      | 0.70 [0.69;0.71]<br><i>P&lt;0.0001</i>  | 0.90 [0.55;1.45]<br><i>p=0.50</i>       | 0.89 [0.88;0.90]<br><i>P&lt;0.0001</i> | 0.80 [0.50;1.28]<br><i>p=0.67</i>  |                                    | 1.07 [0.80;1.43]<br><i>p=0.77</i> |                                   |
| <b>Quadrivalent vaccine only (n=15)</b>                                   |                                         |                                         |                                         |                                        |                                    |                                    |                                   |                                   |
| <b>Overall proportion vaccinated<sup>‡</sup></b>                          |                                         |                                         |                                         |                                        |                                    |                                    |                                   |                                   |
| Low (single cohort and/or low vaccination coverage (<50%)) (n=8)          | 0.85 [0.75;0.96]                        | 0.56 [0.42;0.75]                        | 0.92 [0.85;0.99]                        | 0.68 [0.59;0.78]                       | 0.99 [0.88;1.12]                   | 0.91 [0.73;1.12]                   | 1.07 [0.94;1.21]                  | 1.01 [0.73;1.39]                  |
| Medium/High (multiple cohorts and high vaccination coverage (≥50%)) (n=7) | 0.36 [0.27;0.48]<br><i>p&lt;0.00001</i> | 0.12 [0.06;0.24]<br><i>p=0.0001</i>     | 0.59 [0.49;0.72]<br><i>p&lt;0.00001</i> | 0.23 [0.11;0.48]<br><i>p=0.005</i>     | 0.76 [0.66;0.87]<br><i>p=0.003</i> | 0.39 [0.23;0.65]<br><i>p=0.003</i> | 0.94 [0.89;1.00]<br><i>p=0.07</i> | 0.74 [0.65;0.84]<br><i>p=0.08</i> |
| <b>Data source<sup>§</sup></b>                                            |                                         |                                         |                                         |                                        |                                    |                                    |                                   |                                   |
| Population-based (n=7)                                                    | 0.68 [0.41;1.15]                        | 0.66 [0.46;0.94]                        | 0.78 [0.64;0.95]                        | 0.74 [0.61;0.90]                       | 0.89 [0.83;0.95]                   | 0.82 [0.73;0.91]                   | 0.96 [0.88;1.05]                  | 0.82 [0.49;1.38]                  |
| Health provider/insurance-based (n=5)                                     | 0.68 [0.57;0.80]<br><i>p=0.97</i>       | 0.46 [0.33;0.63]<br><i>p=0.13</i>       | 0.89 [0.78;1.01]<br><i>p=0.27</i>       | 0.55 [0.29;1.04]<br><i>P=0.39</i>      | 1.04 [0.89;1.22]<br><i>p=0.08</i>  | 1.09 [0.88;1.37]<br><i>p=0.02</i>  | 1.11 [0.94;1.30]<br><i>p=0.14</i> | 1.24 [0.79;1.93]<br><i>p=0.24</i> |
| Clinic-based (n=3)                                                        | 0.35 [0.20;0.63]<br><i>p=0.09</i>       | 0.12 [0.06;0.24]<br><i>p&lt;0.00001</i> | 0.52 [0.39;0.69]<br><i>p=0.02</i>       | 0.23 [0.11;0.48]<br><i>p=0.003</i>     | 0.66 [0.50;0.88]<br><i>p=0.05</i>  | 0.39 [0.23;0.65]<br><i>p=0.005</i> | 0.96 [0.81;1.14]<br><i>p=0.97</i> | 0.74 [0.65;0.84]<br><i>p=0.70</i> |

## B) Boys/men

| Study characteristics                                                     | 15-19 years                             |                                         | 20-24 years                        |                                     | 25-29 years                       |                                    | 30-39 years                        |                                         |
|---------------------------------------------------------------------------|-----------------------------------------|-----------------------------------------|------------------------------------|-------------------------------------|-----------------------------------|------------------------------------|------------------------------------|-----------------------------------------|
|                                                                           | 1-4 yrs                                 | 5-8 yrs                                 | 1-4 yrs                            | 5-8 yrs                             | 1-4 yrs                           | 5-8 yrs                            | 1-4 yrs                            | 5-8 yrs                                 |
|                                                                           | RR [95% CI]<br><i>p-value*</i>          | RR [95% CI]<br><i>p-value*</i>          | RR [95% CI]<br><i>p-value*</i>     | RR [95% CI]<br><i>p-value*</i>      | RR [95% CI]<br><i>p-value*</i>    | RR [95% CI]<br><i>p-value*</i>     | RR [95% CI]<br><i>p-value*</i>     | RR [95% CI]<br><i>p-value*</i>          |
| <b>Vaccine</b>                                                            |                                         |                                         |                                    |                                     |                                   |                                    |                                    |                                         |
| Quadrivalent (n=14)                                                       | 0.80 [0.62;1.04]                        | 0.52 [0.37;0.75]                        | 0.93 [0.82;1.06]                   | 0.67 [0.47;0.97]                    | 1.04 [0.93;1.17]                  | NA                                 | 1.08 [0.99;1.19]                   | NA                                      |
| Bivalent (n=3)                                                            | 0.99 [0.97;1.08]<br><i>p=0.10</i>       | 0.83 [0.81;0.86]<br><i>p=0.01</i>       | 0.96 [0.71;1.29]<br><i>p=0.86</i>  | 0.99 [0.97;1.00]<br><i>p=0.04</i>   | 1.15 [0.69;1.91]<br><i>p=0.73</i> |                                    | 0.96 [0.71;1.29]<br><i>p=0.45</i>  |                                         |
| <b>Quadrivalent vaccine (n=14)</b>                                        |                                         |                                         |                                    |                                     |                                   |                                    |                                    |                                         |
| <b>Overall proportion vaccinated<sup>¥</sup></b>                          |                                         |                                         |                                    |                                     |                                   |                                    |                                    |                                         |
| Low (single cohort and /or low vaccination coverage (<50%)) (n=8)         | 1.03 [0.90;1.18]                        | 0.99 [0.80;1.22]                        | 1.05 [0.90;1.23]                   | 0.95 [0.72;1.25]                    | 1.14 [0.98;1.34]                  | 1.18 [0.83;1.68]                   | 1.18 [1.06;1.32]                   | 1.36 [1.04;1.77]                        |
| Medium/High (multiple cohorts and high vaccination coverage (≥50%)) (n=6) | 0.56 [0.42;0.73]<br><i>p&lt;0.00001</i> | 0.14 [0.10;0.18]<br><i>p&lt;0.00001</i> | 0.80 [0.71;0.89]<br><i>p=0.005</i> | 0.37 [0.23;0.61]<br><i>p=0.001</i>  | 0.91 [0.83;1.01]<br><i>p=0.02</i> | 0.59 [0.41;0.85]<br><i>p=0.008</i> | 0.98 [0.91;1.05]<br><i>p=0.005</i> | 0.68 [0.62;0.73]<br><i>p&lt;0.00001</i> |
| <b>Data source<sup>§</sup></b>                                            |                                         |                                         |                                    |                                     |                                   |                                    |                                    |                                         |
| Population-based (n=6)                                                    | 0.92 [0.57;1.47]                        | 0.95 [0.90;1.01]                        | 0.94 [0.83;1.06]                   | 0.94 [0.80;1.11]                    | 1.03 [0.98;1.09]                  | 1.02 [0.90;1.16]                   | 1.07 [1.00;1.14]                   | 1.23 [1.17;1.29]                        |
| Health provider/insurance-based (n=5)                                     | 0.92 [0.72;1.18]<br><i>p=0.99</i>       | 0.82[0.28;2.33]<br><i>p=0.78</i>        | 1.05 [0.82;1.36]<br><i>p=0.43</i>  | 0.91 [0.36;2.31]<br><i>p=0.95</i>   | 1.14 [0.90;1.44]<br><i>p=0.42</i> | 1.30 [0.68;2.48]<br><i>p=0.48</i>  | 1.16 [0.98;1.39]<br><i>p=0.37</i>  | 1.46 [0.95;2.21]<br><i>p=0.44</i>       |
| Clinic-based (n=3)                                                        | 0.44 [0.37;0.51]<br><i>p=0.004</i>      | 0.14 [0.10;0.18]<br><i>p&lt;0.00001</i> | 0.71 [0.61;0.84]<br><i>p=0.008</i> | 0.37 [0.23;0.61]<br><i>p=0.0005</i> | 0.86 [0.75;0.98]<br><i>p=0.01</i> | 0.59 [0.41;0.85]<br><i>p=0.006</i> | 0.94 [0.87;1.01]<br><i>p=0.007</i> | 0.68 [0.62;0.73]<br><i>p&lt;0.00001</i> |

RR = Relative Risk: incidence/prevalence of AGW in the post-vaccination periods (1-4 yrs or 5-8 yrs) compared to the pre-vaccination period.

CI = Confidence Interval.

\* p-values indicate the statistical significance of comparisons between subgroups of studies.

¥ For studies on AGW, the vaccination coverage is not available specifically for study participants. We classified studies into 2 groups according to 1) whether the country/setting vaccinate a single routine cohort of girls or multiple cohorts of girls and 2) the vaccination coverage in routine age groups is < or ≥50%.

§ Studies using health provider/insurance based data and studies using clinic-based data were compared to studies using population-based data.

**Table S13. Subgroup analyses of the changes in CIN2+ between the pre- and post-vaccination periods (1-4 yrs and 5-8 years) among girls/women.**

| Study characteristics                                                     | 15-19 years                       |                                         | 20-24 years                             |                                         | 25-29 years                       |                                         | 30-39 years                             |                                   |
|---------------------------------------------------------------------------|-----------------------------------|-----------------------------------------|-----------------------------------------|-----------------------------------------|-----------------------------------|-----------------------------------------|-----------------------------------------|-----------------------------------|
|                                                                           | 1-4 yrs                           | 5-9 yrs                                 | 1-4 yrs                                 | 5-9 yrs                                 | 1-4 yrs                           | 5-9 yrs                                 | 1-4 yrs                                 | 5-9 yrs                           |
|                                                                           | RR [95% CI]<br><i>p-value*</i>    | RR [95% CI]<br><i>p-value*</i>          | RR [95% CI]<br><i>p-value*</i>          | RR [95% CI]<br><i>p-value*</i>          | RR [95% CI]<br><i>p-value*</i>    | RR [95% CI]<br><i>p-value*</i>          | RR [95% CI]<br><i>p-value*</i>          | RR [95% CI]<br><i>p-value*</i>    |
| <b>Vaccine</b>                                                            |                                   |                                         |                                         |                                         |                                   |                                         |                                         |                                   |
| Quadrivalent (n=8)                                                        | 0.73 [0.67;0.79]                  | 0.49 [0.42;0.58]                        | 0.98 [0.85;1.13]                        | 0.78 [0.64;0.95]                        | 1.12 [1.05;1.20]                  | 1.19 [1.06;1.32]                        | 1.07 [1.00;1.14]                        | 1.23 [1.13;1.34]                  |
| Bivalent (n=1)                                                            | NA                                | NA                                      | 0.66 [0.57;0.77]<br><i>p=0.0002</i>     | 0.29 [0.23;0.36]<br><i>p&lt;0.00001</i> | NA                                | NA                                      | NA                                      | NA                                |
| <b>Overall proportion vaccinated<sup>‡</sup></b>                          |                                   |                                         |                                         |                                         |                                   |                                         |                                         |                                   |
| Low (single cohort and/or low vaccination coverage (<50%)) (n=1)          | 0.86 [0.61;1.22]                  | 1.73 [1.02;2.93]                        | 1.41 [1.28;1.54]                        | 2.08 [1.83;2.36]                        | 1.23 [1.17;1.30]                  | 1.55 [1.44;1.66]                        | 1.05 [1.01;1.10]                        | 1.23 [1.16;1.30]                  |
| Medium/High (multiple cohorts and high vaccination coverage (≥50%)) (n=8) | 0.72 [0.66;0.78]<br><i>p=0.31</i> | 0.43 [0.40;0.46]<br><i>p&lt;0.00001</i> | 0.88 [0.77;1.02]<br><i>P&lt;0.00001</i> | 0.59 [0.50;0.68]<br><i>p&lt;0.00001</i> | 1.11 [1.03;1.19]<br><i>p=0.02</i> | 1.12 [1.03;1.21]<br><i>p&lt;0.00001</i> | 1.07 [0.99;1.15]<br><i>p=0.73</i>       | 1.24 [1.12;1.37]<br><i>p=0.90</i> |
| <b>HPV testing utilisation (any time during study period)</b>             |                                   |                                         |                                         |                                         |                                   |                                         |                                         |                                   |
| Yes (n=6)                                                                 | 0.75 [0.64;0.88]                  | 0.59 [0.43;0.83]                        | 0.97 [0.77;1.21]                        | 0.80 [0.55;1.17]                        | 1.12 [1.02;1.24]                  | 1.21 [0.99;1.47]                        | 1.04 [1.01;1.07]                        | 1.22 [1.11;1.34]                  |
| No (n=3)                                                                  | 0.71 [0.67;0.75]<br><i>p=0.45</i> | 0.41 [0.38;0.44]<br><i>p=0.03</i>       | 0.84 [0.53;1.31]<br><i>p=0.57</i>       | 0.46 [0.19;1.09]<br><i>p=0.25</i>       | 1.13 [1.11;1.15]<br><i>p=0.91</i> | 1.10 [1.08;1.12]<br><i>p=0.36</i>       | 1.17 [1.14;1.19]<br><i>p&lt;0.00001</i> | 1.30 [1.28;1.32]<br><i>p=0.18</i> |
| <b>Introduction of HPV testing in the post-vaccination period</b>         |                                   |                                         |                                         |                                         |                                   |                                         |                                         |                                   |
| Yes (n=4)                                                                 | 0.66 [0.63;0.69]                  | 0.44 [0.42;0.47]                        | 0.81 [0.66;1.00]                        | 0.63 [0.47;0.84]                        | 1.08 [0.95;1.22]                  | 1.13 [0.97;1.32]                        | 1.04 [0.97;1.12]                        | 1.21 [1.05;1.40]                  |
| No (n=5)                                                                  | 0.81 [0.67;1.00]<br><i>p=0.04</i> | 0.82 [0.20;3.36]<br><i>p=0.39</i>       | 1.08 [0.88;1.32]<br><i>p=0.06</i>       | 0.76 [0.33;1.74]<br><i>p=0.68</i>       | 1.18 [1.12;1.24]<br><i>p=0.21</i> | 1.30 [0.93;1.82]<br><i>p=0.45</i>       | 1.08 [1.00;1.18]<br><i>p=0.47</i>       | 1.27 [1.20;1.34]<br><i>p=0.54</i> |
| <b>Older age at start of screening in the post-vaccination period</b>     |                                   |                                         |                                         |                                         |                                   |                                         |                                         |                                   |
| Yes (n=6)                                                                 | 0.67 [0.64;0.70]                  | 0.59 [0.43;0.83]                        | 0.91 [0.72;1.14]                        | 0.80 [0.55;1.17]                        | NA                                | NA                                      | NA                                      | NA                                |
| No (n=3)                                                                  | 0.85 [0.57;1.26]<br><i>p=0.24</i> | 0.41 [0.39;0.44]<br><i>p=0.03</i>       | 0.99 [0.78;1.24]<br><i>p=0.62</i>       | 0.46 [0.19;1.09]<br><i>p=0.25</i>       |                                   |                                         |                                         |                                   |
| <b>Longer screening intervals in the post-vaccination period</b>          |                                   |                                         |                                         |                                         |                                   |                                         |                                         |                                   |
| Yes (n=4)                                                                 | 0.66 [0.63;0.69]                  | 0.44 [0.42;0.47]                        | 0.81 [0.66;1.00]                        | 0.63 [0.47;0.84]                        | 1.08 [0.95;1.22]                  | 1.13 [0.97;1.32]                        | 1.04 [0.97;1.12]                        | 1.21 [1.05;1.40]                  |
| No (n=5)                                                                  | 0.82 [0.67;1.00]<br><i>p=0.04</i> | 0.82 [0.20;3.36]<br><i>p=0.39</i>       | 1.08 [0.88;1.32]<br><i>p=0.06</i>       | 0.76 [0.33;1.75]<br><i>p=0.69</i>       | 1.18 [1.12;1.24]<br><i>p=0.21</i> | 1.30 [0.93;1.82]<br><i>p=0.45</i>       | 1.09 [1.00;1.18]<br><i>p=0.47</i>       | 1.27 [1.20;1.34]<br><i>p=0.54</i> |

RR = Relative Risk: incidence of CIN2+ in the post-vaccination periods (1-4 yrs or 5-8 yrs) compared to the pre-vaccination period.

CI = Confidence Interval.

\* p-values indicate the statistical significance of comparisons between subgroups of studies.

<sup>‡</sup> For studies on CIN2+, the vaccination coverage is not available specifically for study participants. We classified studies into 2 groups according to 1) whether the country/setting vaccinate a single routine cohort of girls or multiple cohorts of girls and 2) the vaccination coverage in routine age groups is < or ≥50%.

**Figure S1. Changes in the prevalence of HPV infections between the pre- and post-vaccination periods, stratified by years of follow-up, and ranked by age-specific vaccination coverage for at least one dose.**

**A) Girls aged 13-19 years old**

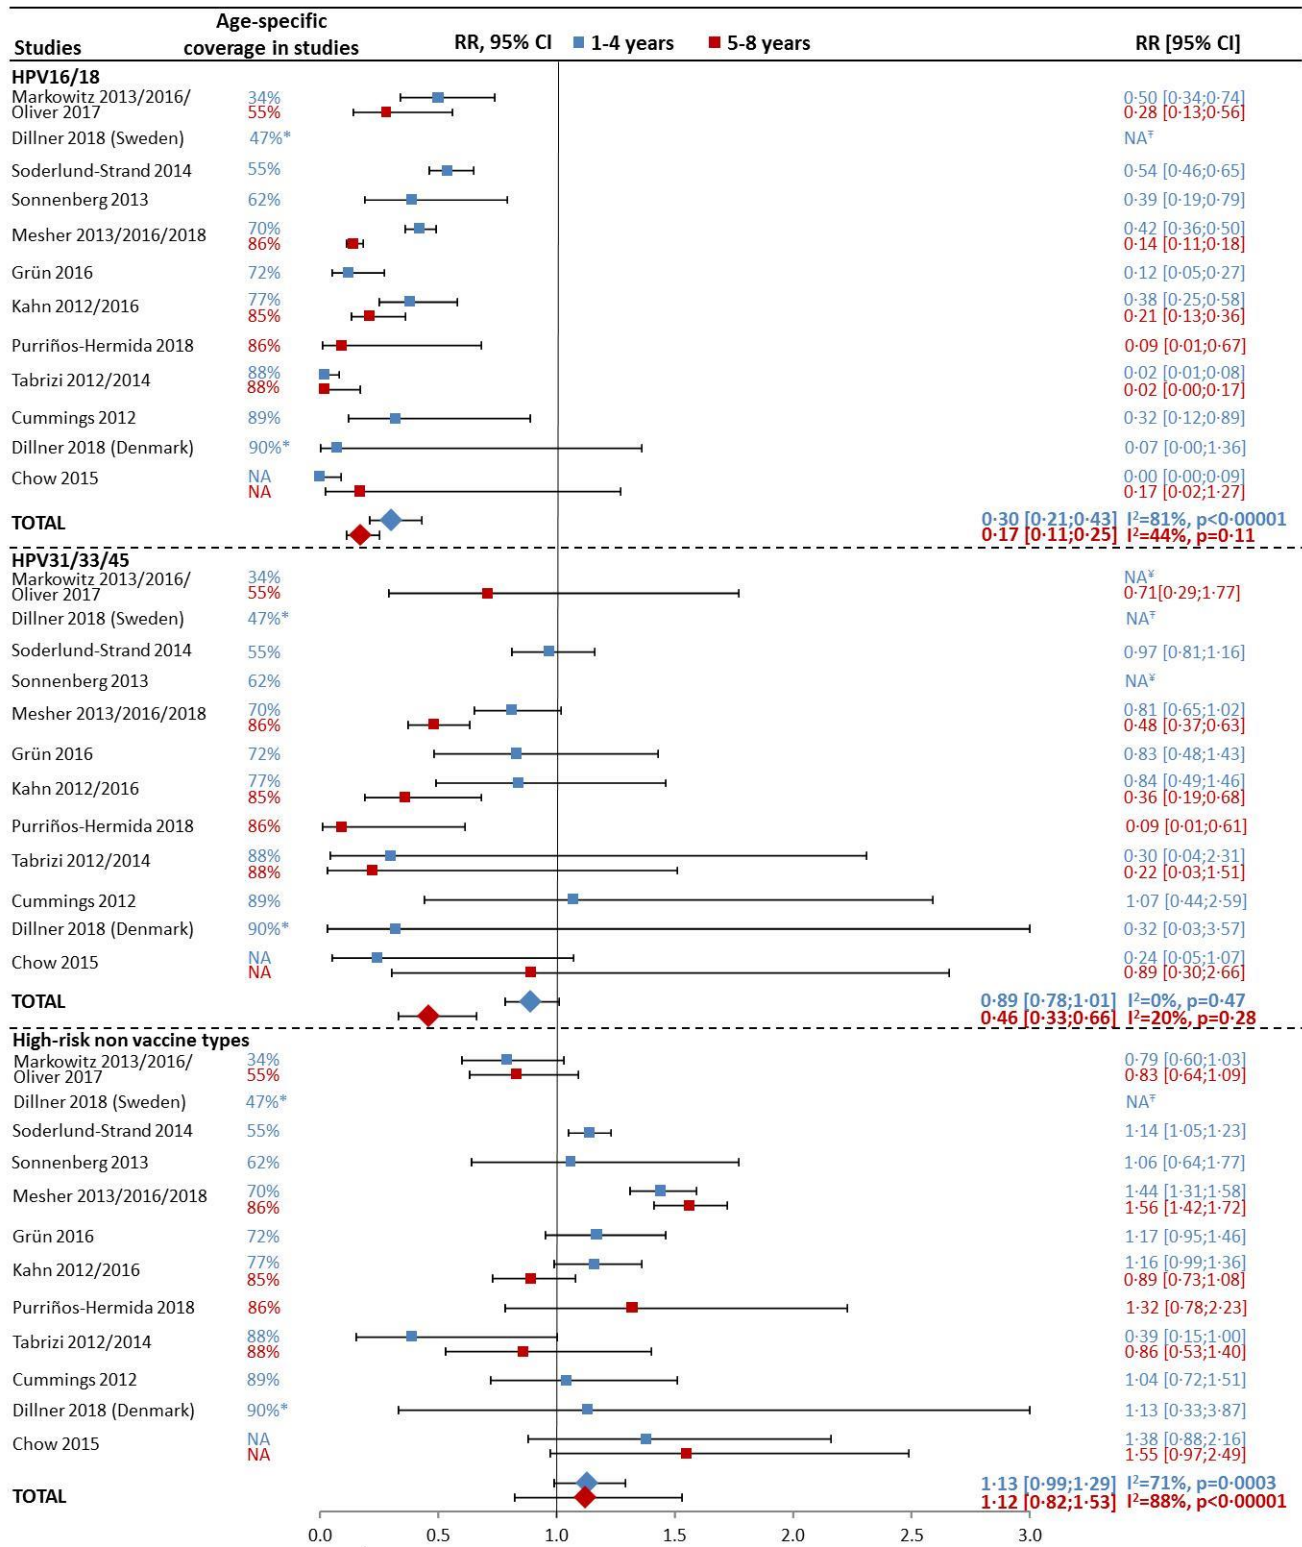

\* Vaccination status of women included in the study was not available. We present the age-specific coverage at the country level.  
<sup>†</sup> Data from Sweden not included since there was only 1 woman in the youngest age group.  
<sup>‡</sup> Data not provided/included because they were judged potentially unreliable according to NHANES Survey analytic guidelines (prevalence estimates had a relative standard error of >30% and the sample size was below that recommended for analyses of complex survey data, by design effect and specified proportion).



## B) Women aged 20-24 years old

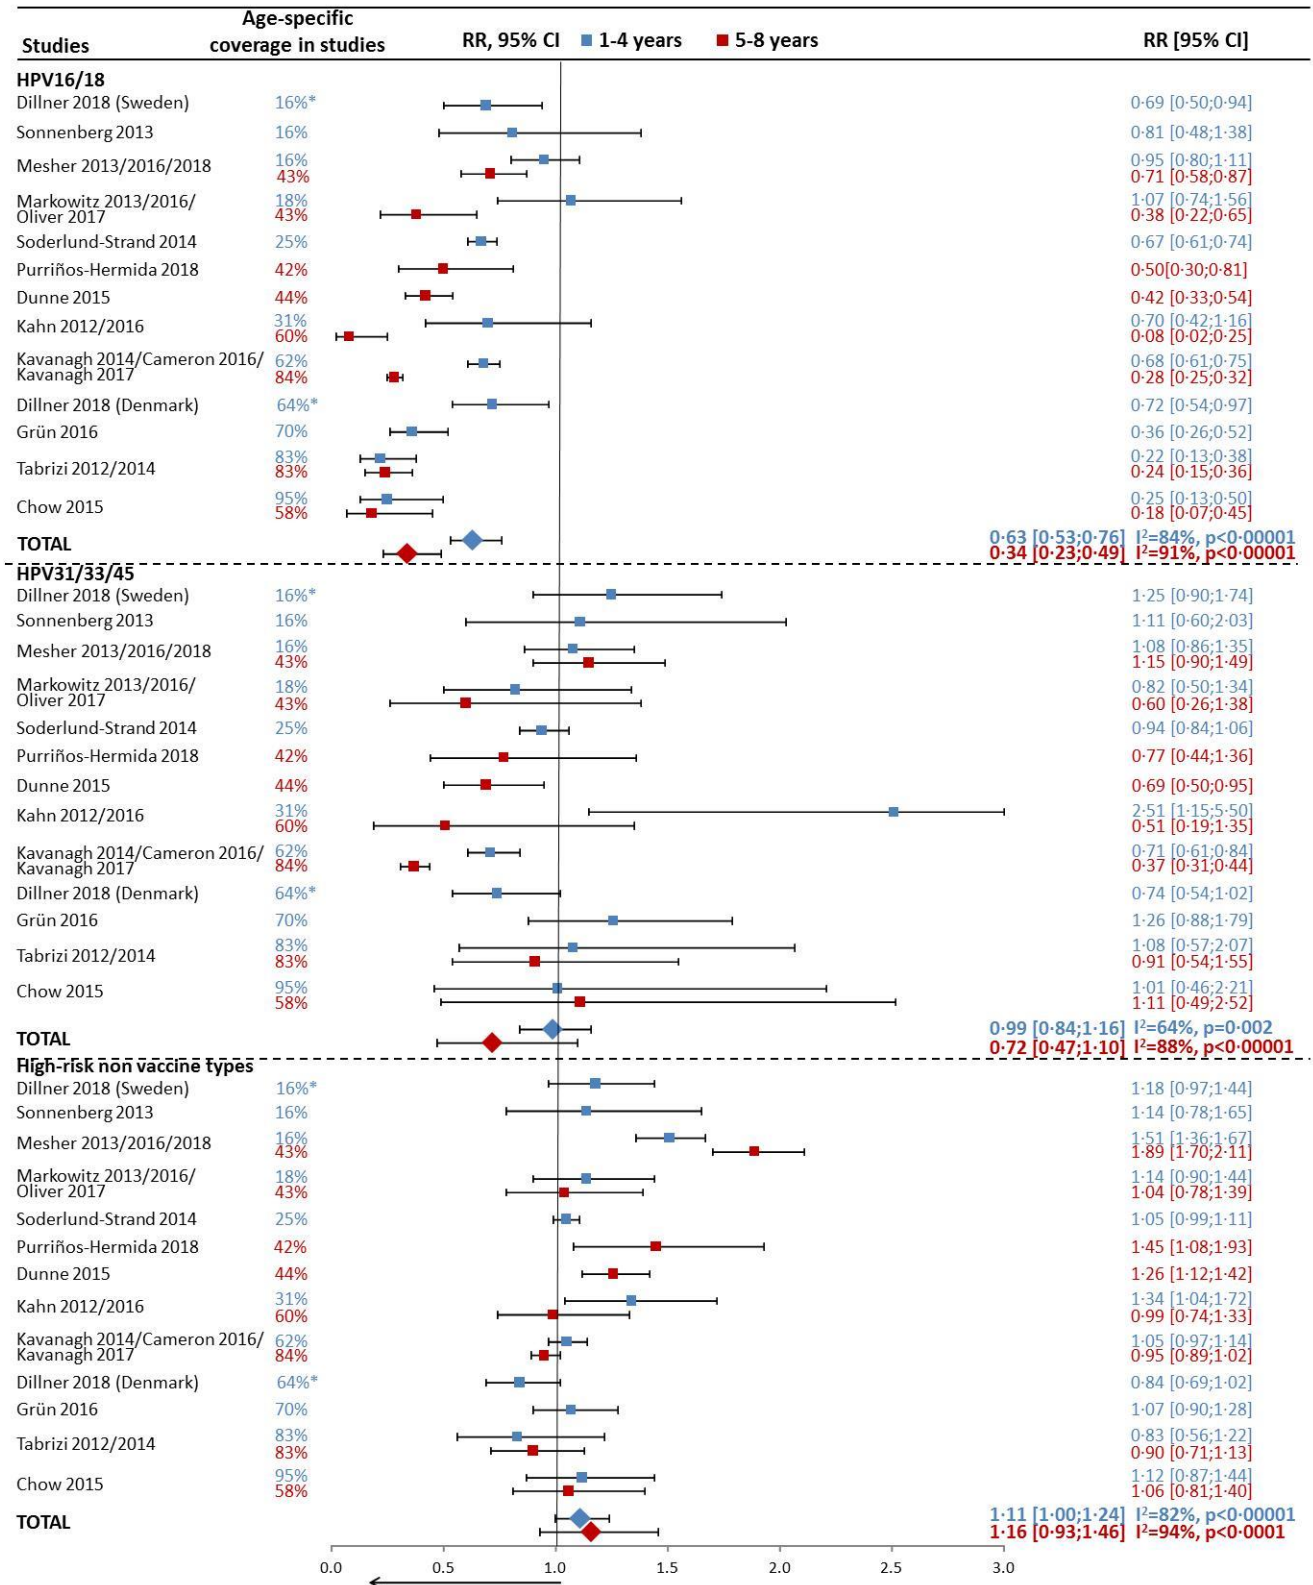

\* Vaccination status of women included in the study was not available. We present the age-specific coverage at the country level.

### C) Women aged 25-29 years old

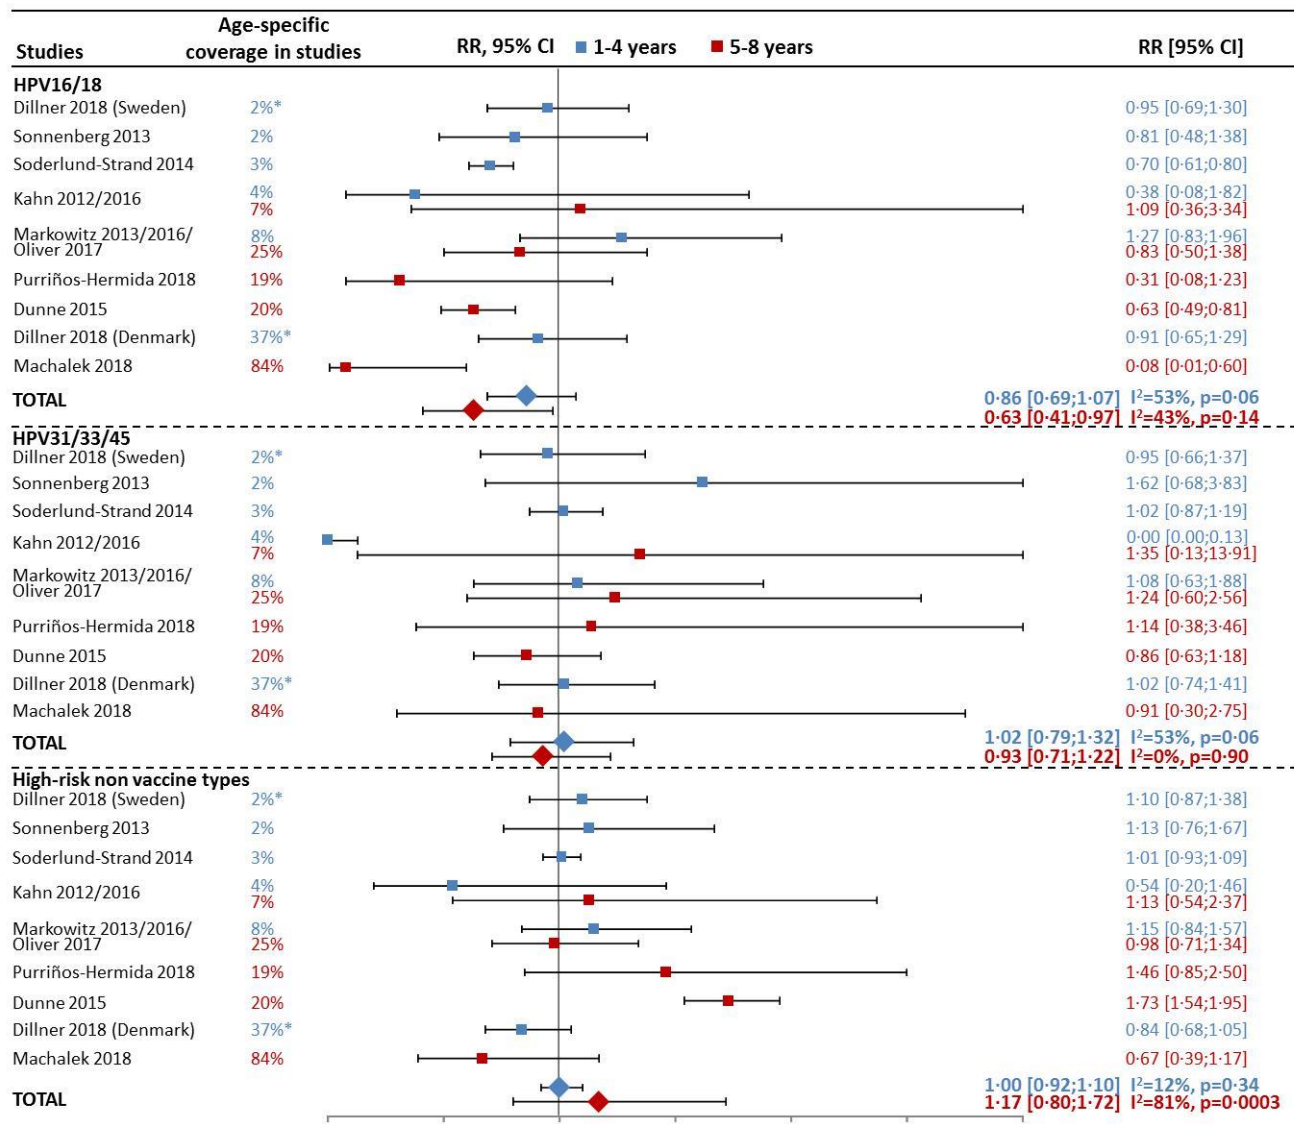

\* Vaccination status of women included in the study was not available. We present the age-specific coverage at the country level.

### D) Boys aged 16-19 years old<sup>\*†</sup>

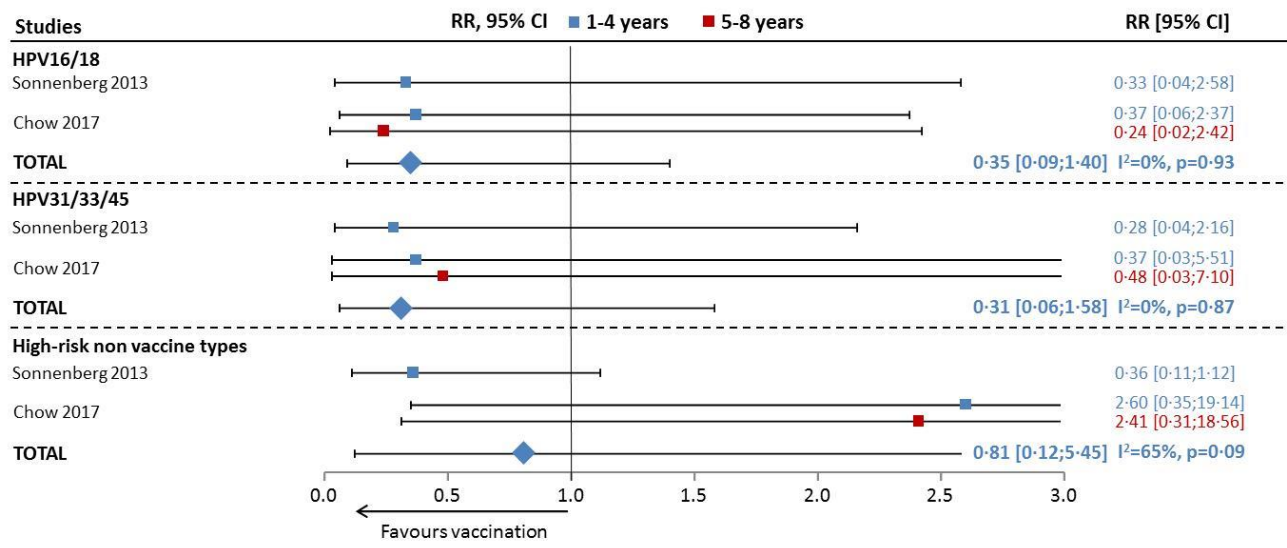

\*For both studies, HPV prevalence for males was estimated from urine samples, which have a lower sensitivity for detection of HPV and could lead to an underestimation of RR.

† Data for Sonnenberg were available for boys aged 18-19 years old.

### E) Men aged 20-24 years old<sup>\*</sup>

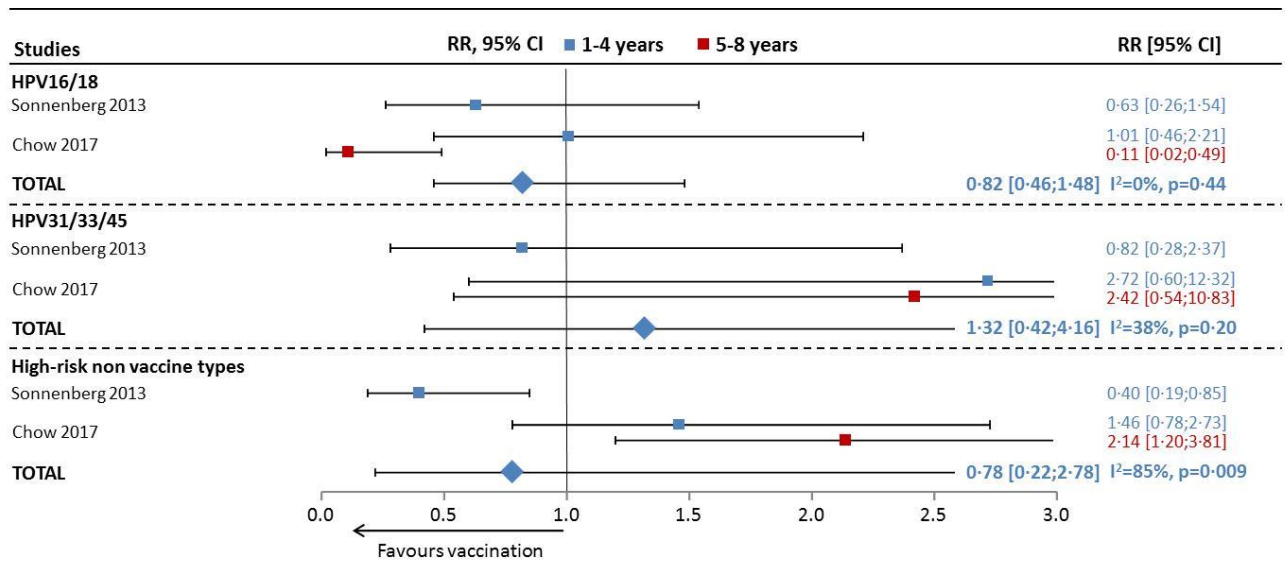

\*For both studies, HPV prevalence for males was estimated from urine samples, which have a lower sensitivity for detection of HPV and could lead to an underestimation of RR.

**Figure S2. Changes in anogenital warts diagnoses between the pre- and post-vaccination periods, ranked by the number of cohorts vaccinated (single vs multiple-age cohorts) vaccination coverage.**

**A) Girls aged 15-19 years old**

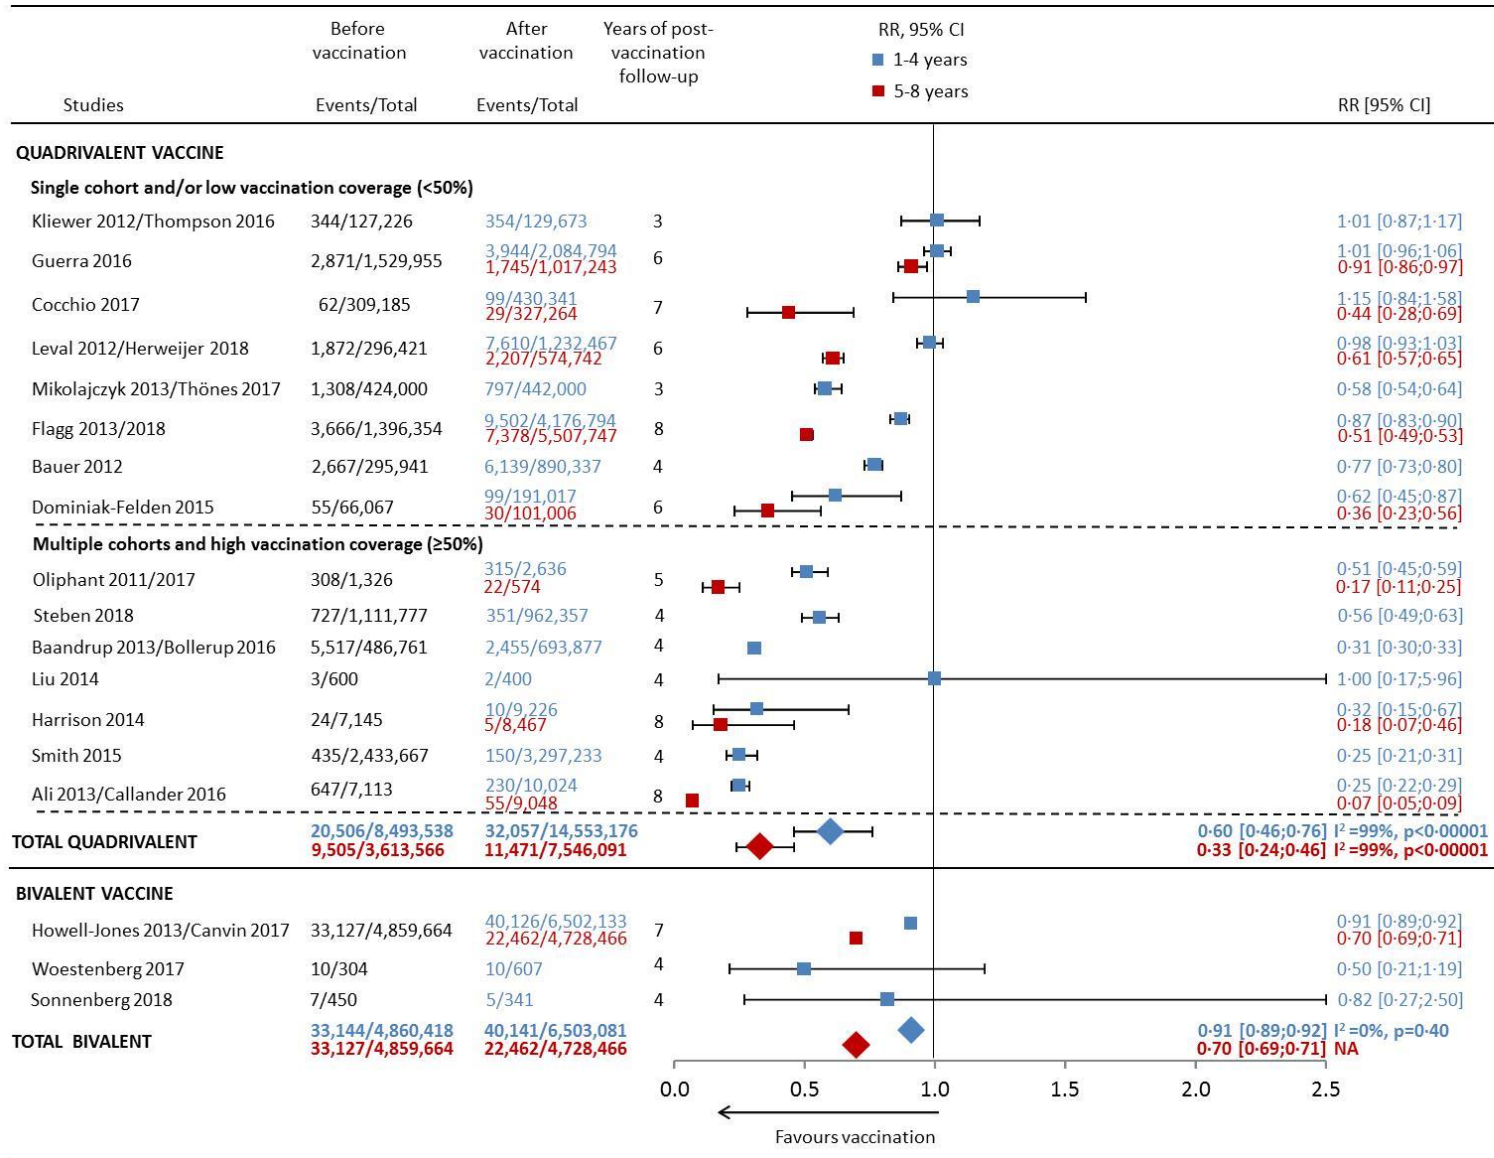



## B) Women aged 20-24 years old

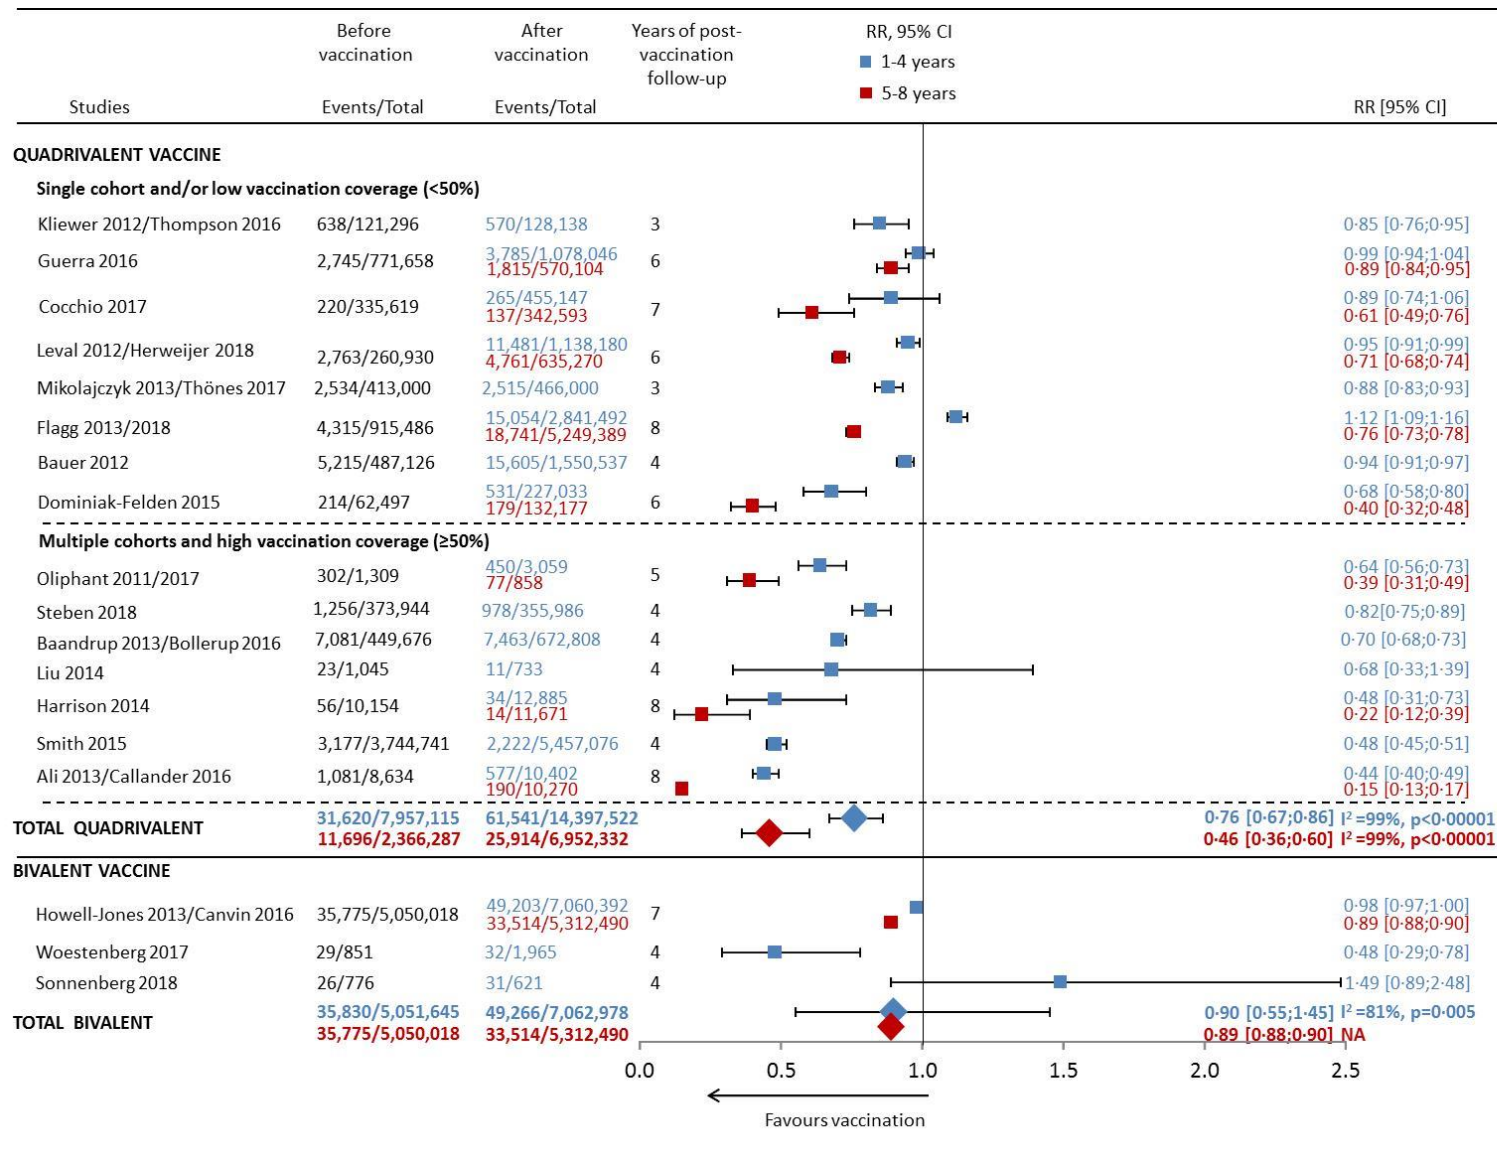

### C) Women aged 25-29 years old

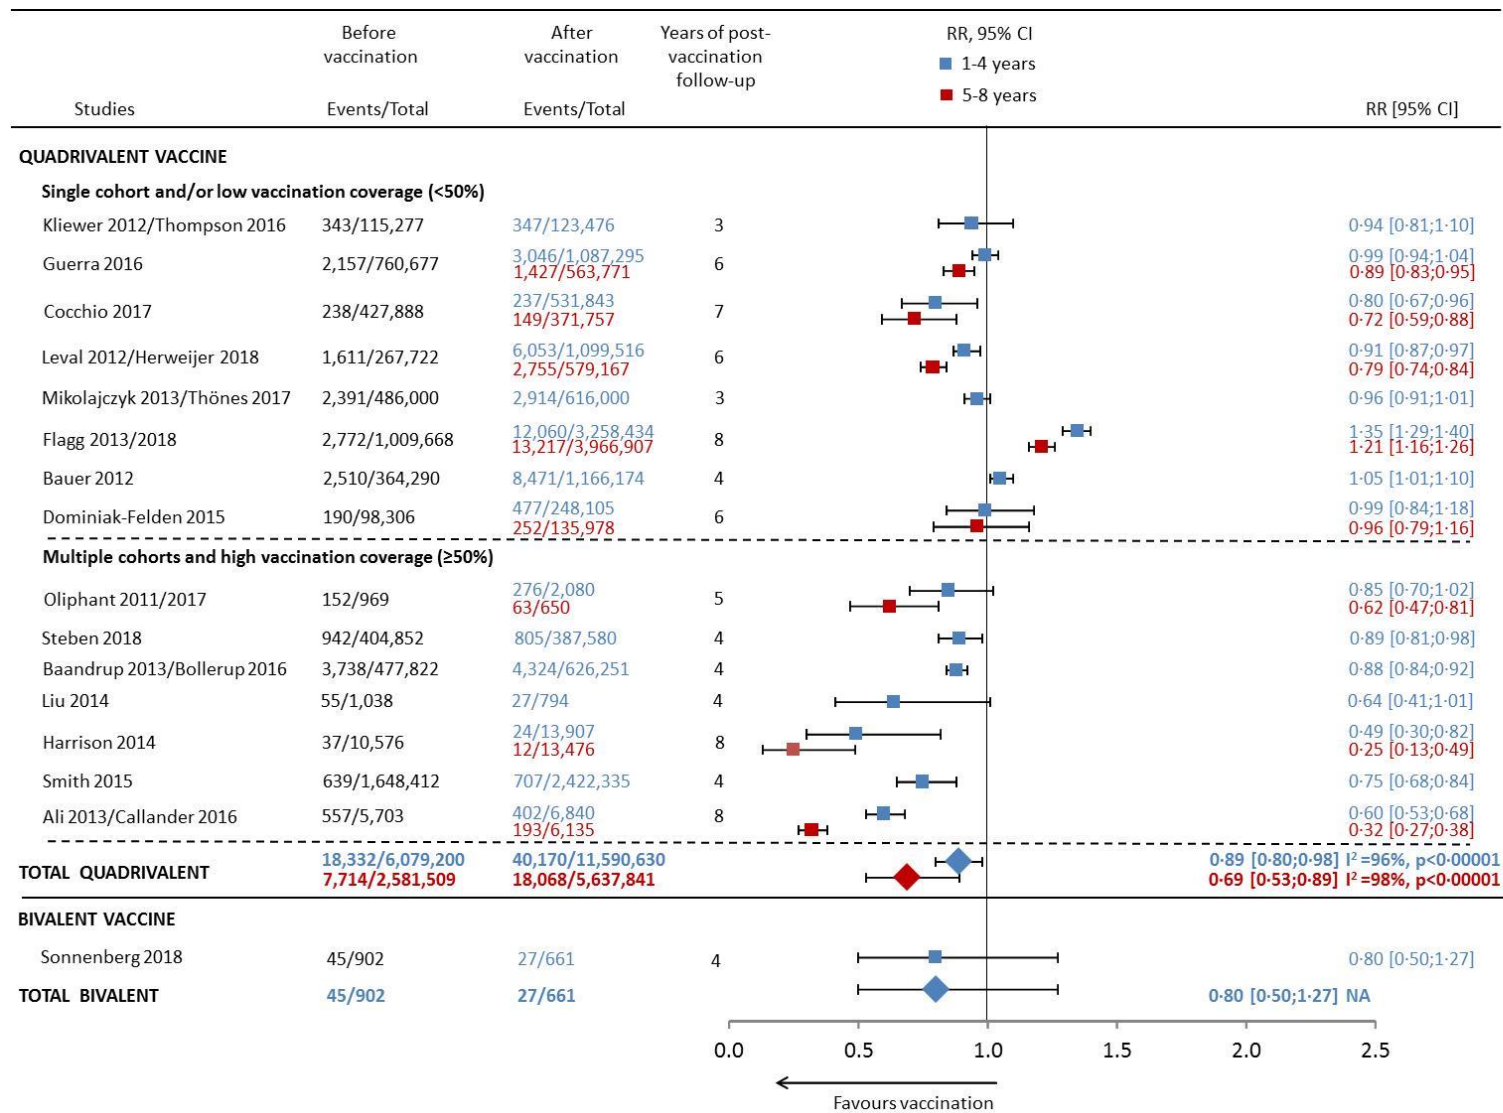

## D) Women aged 30-39 years old

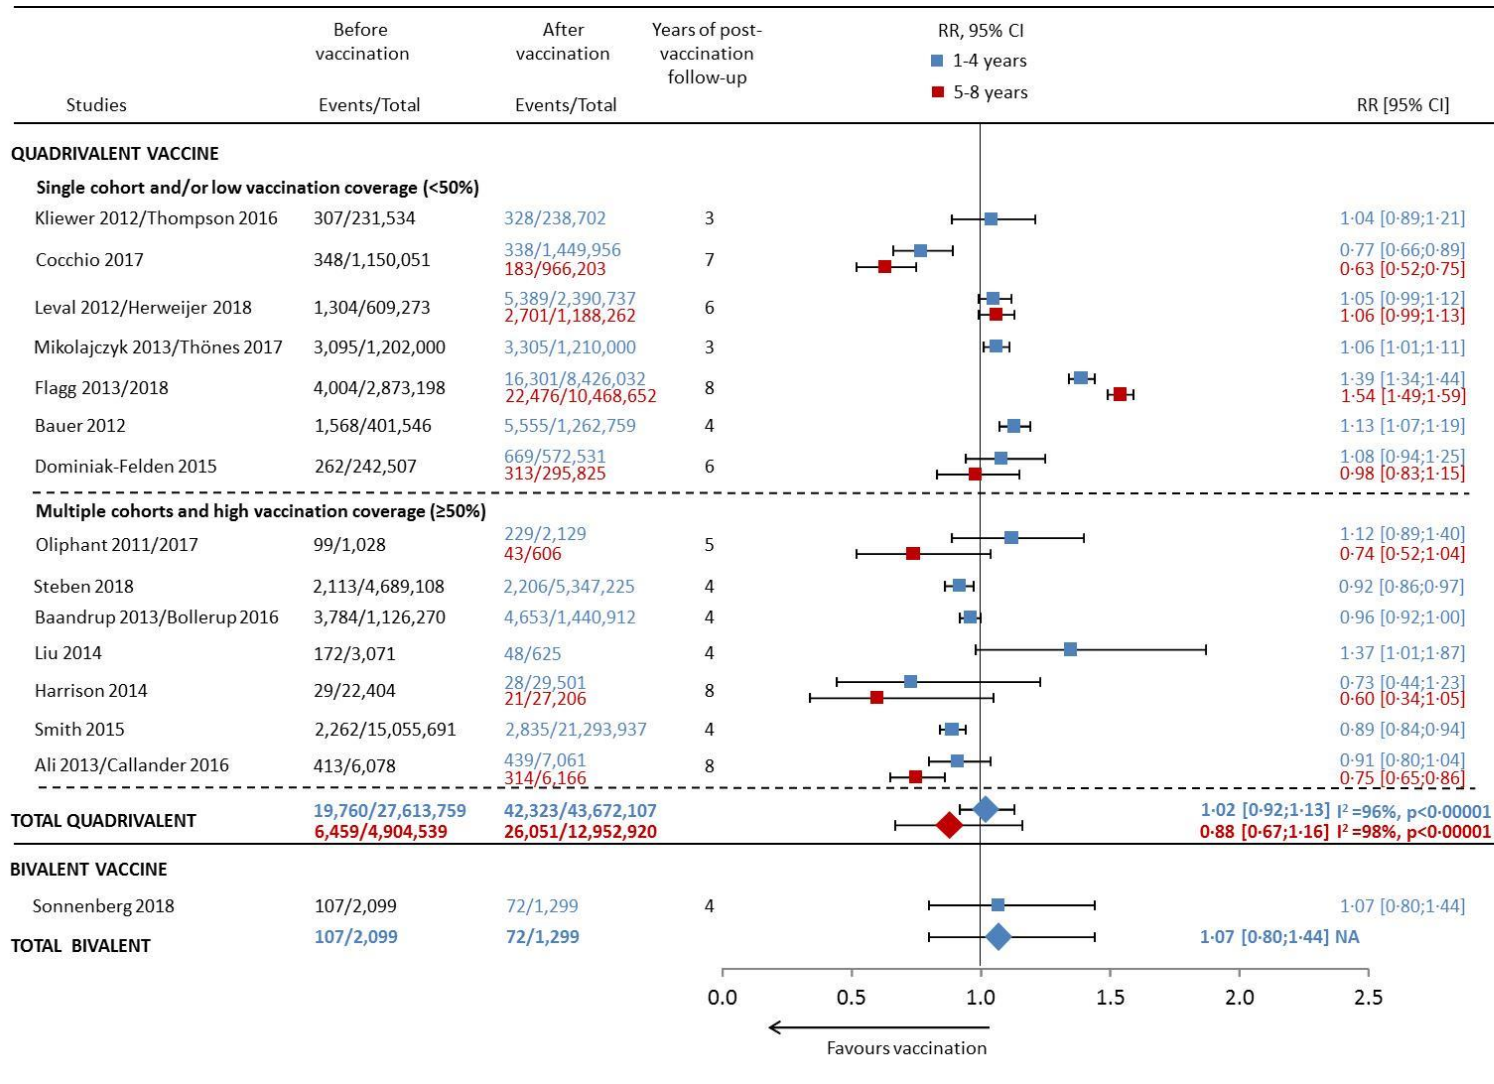

### E) Boys aged 15-19 years old

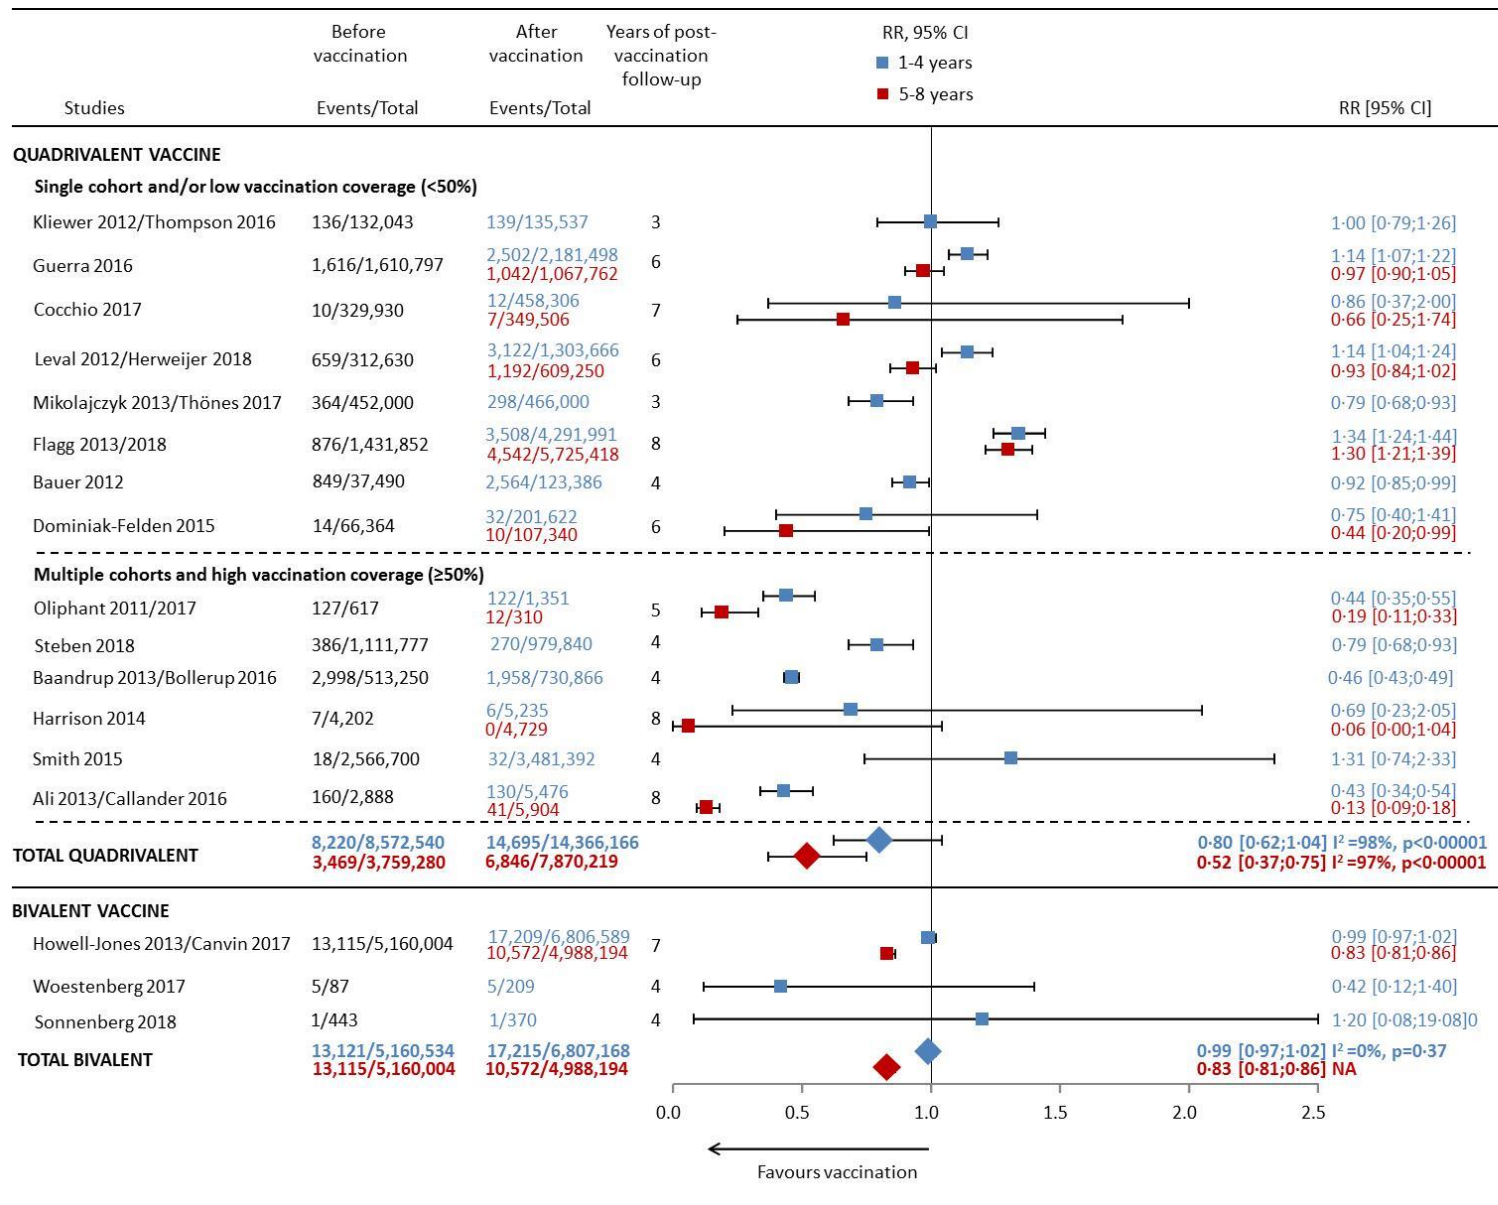



## F) Men aged 20-24 years old

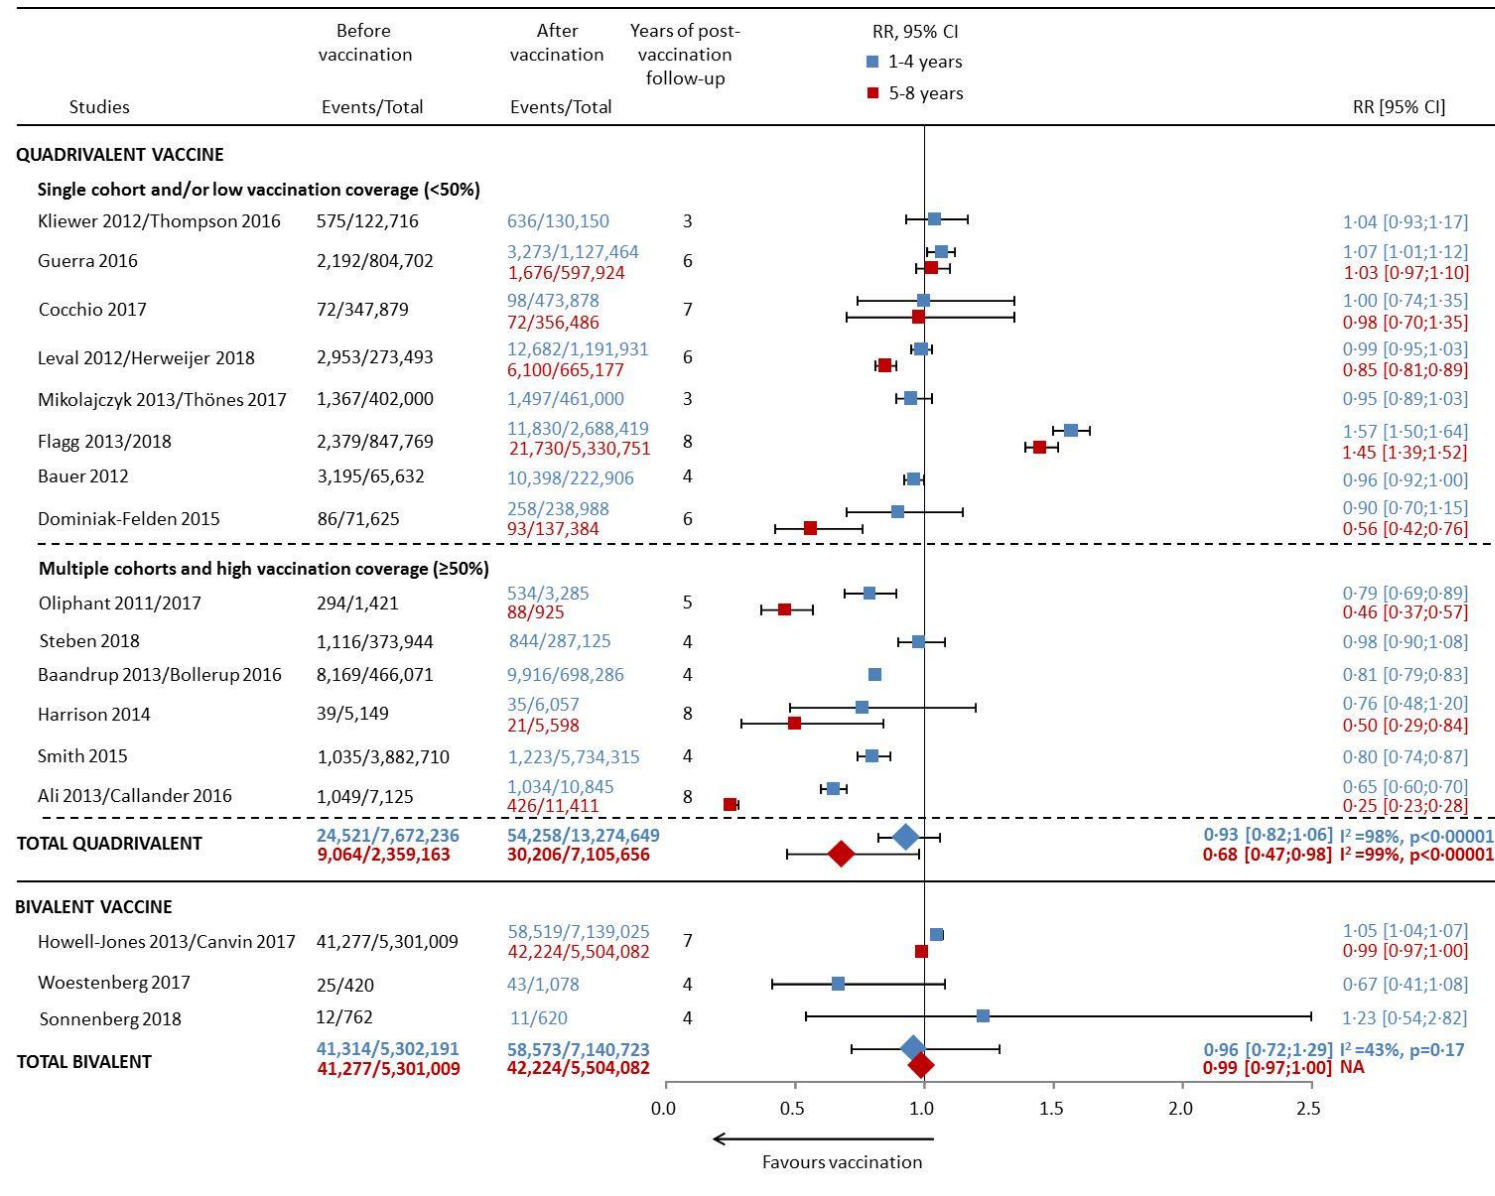

G) Men aged 25-29 years old

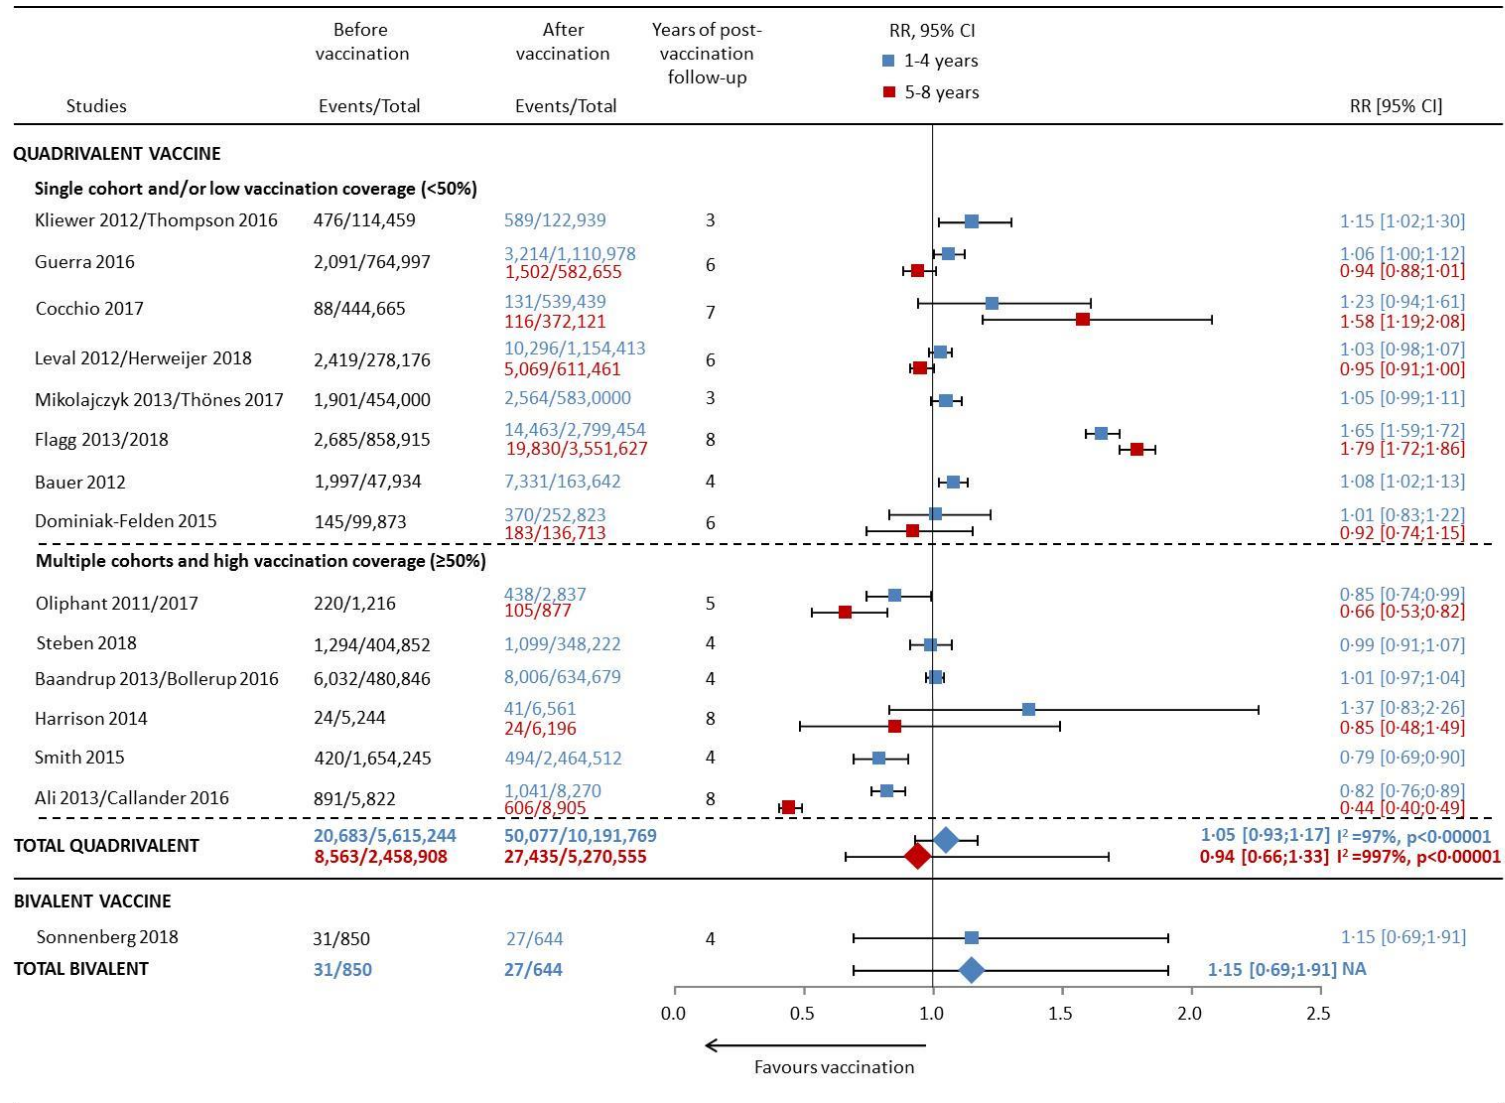

## H) Men aged 30-39 years old

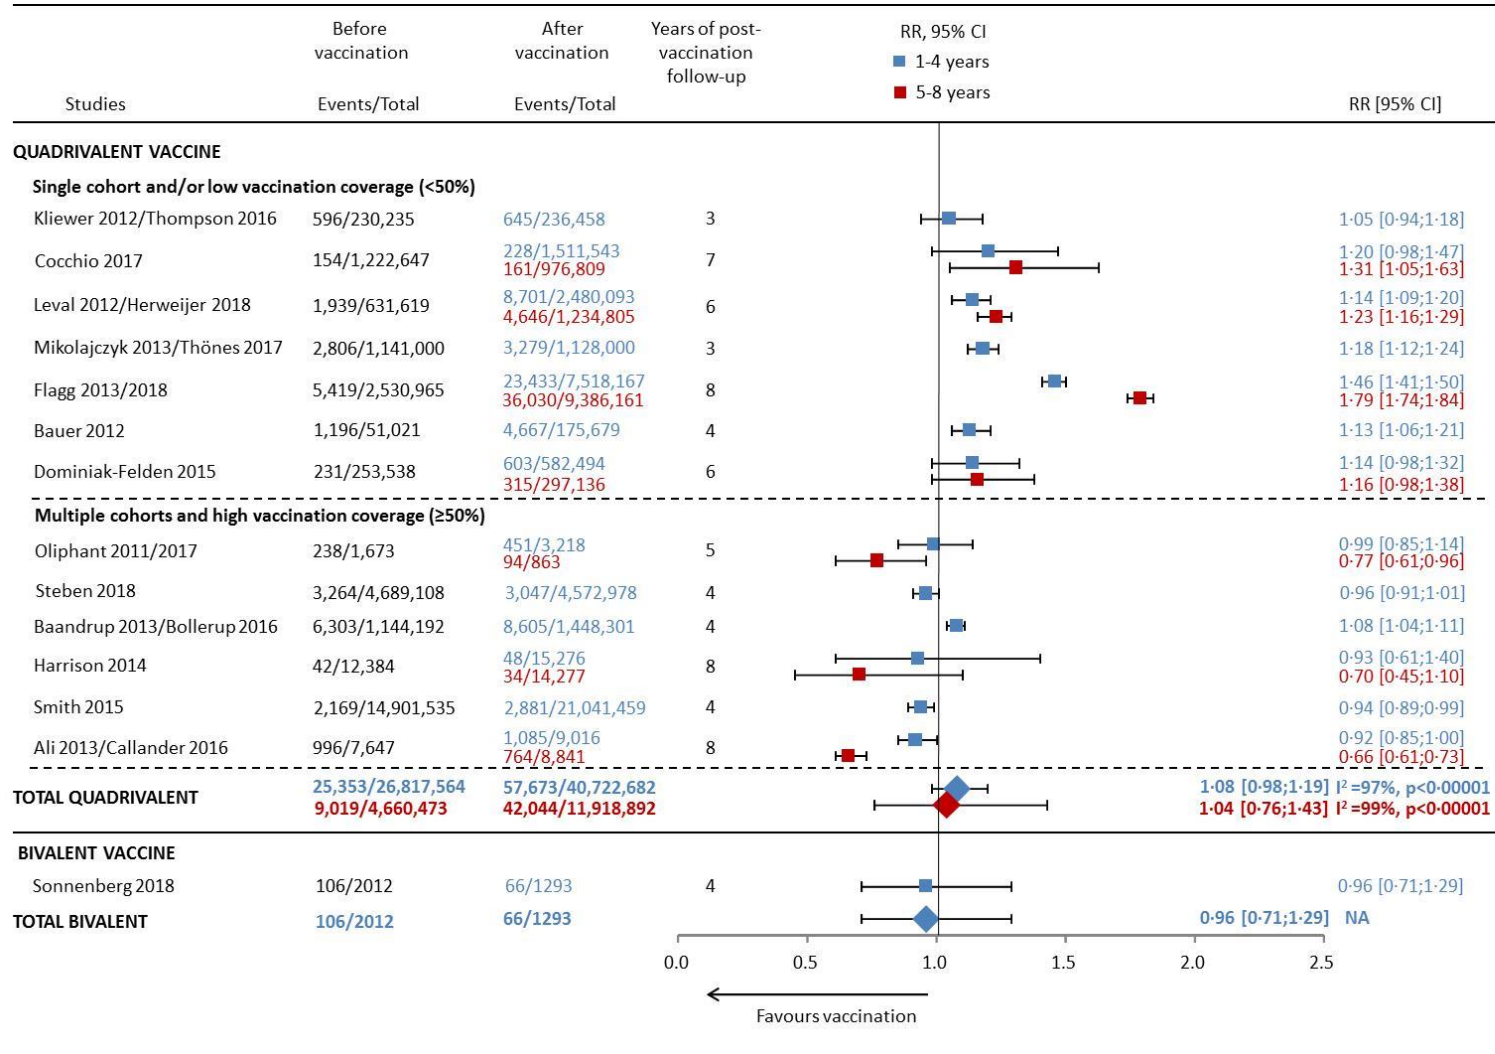

**Figure S3. Changes in CIN2+ between the pre- and post-vaccination periods, ranked by the number of cohorts vaccinated (single vs multiple-age cohorts) and female vaccination coverage.**

**A) Girls aged 15-19 years old**

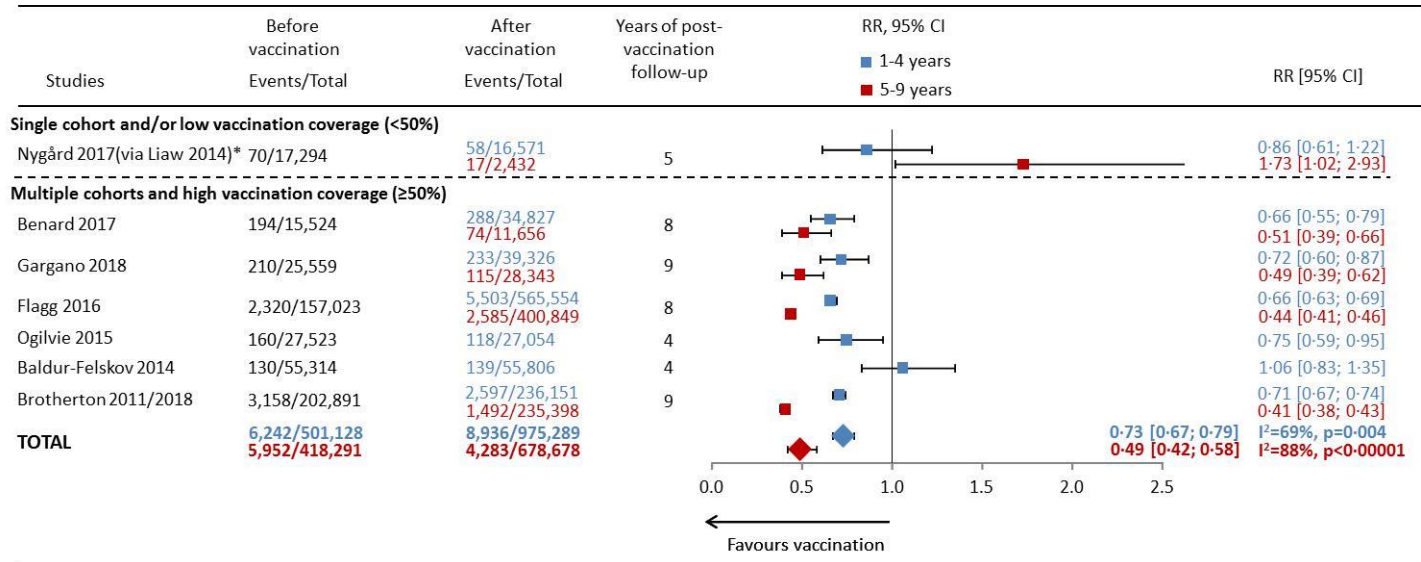

**B) Women aged 20-24 years old**

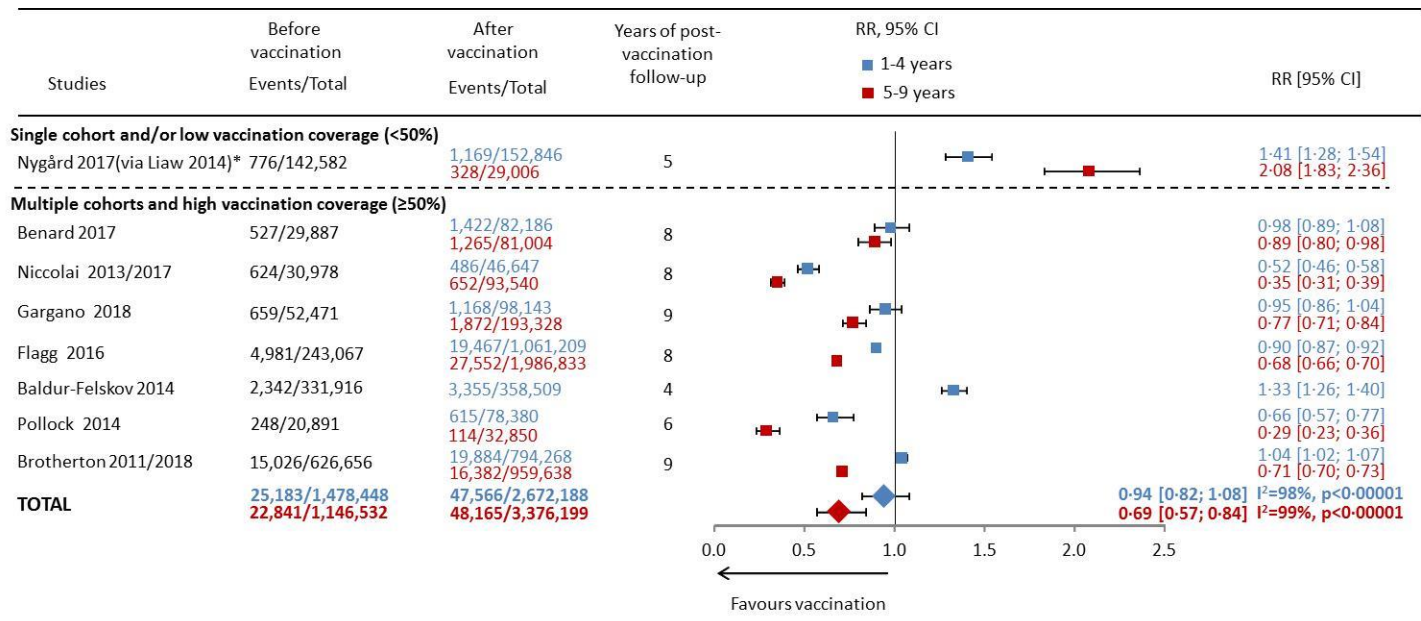



### C) Women aged 25-29 years old

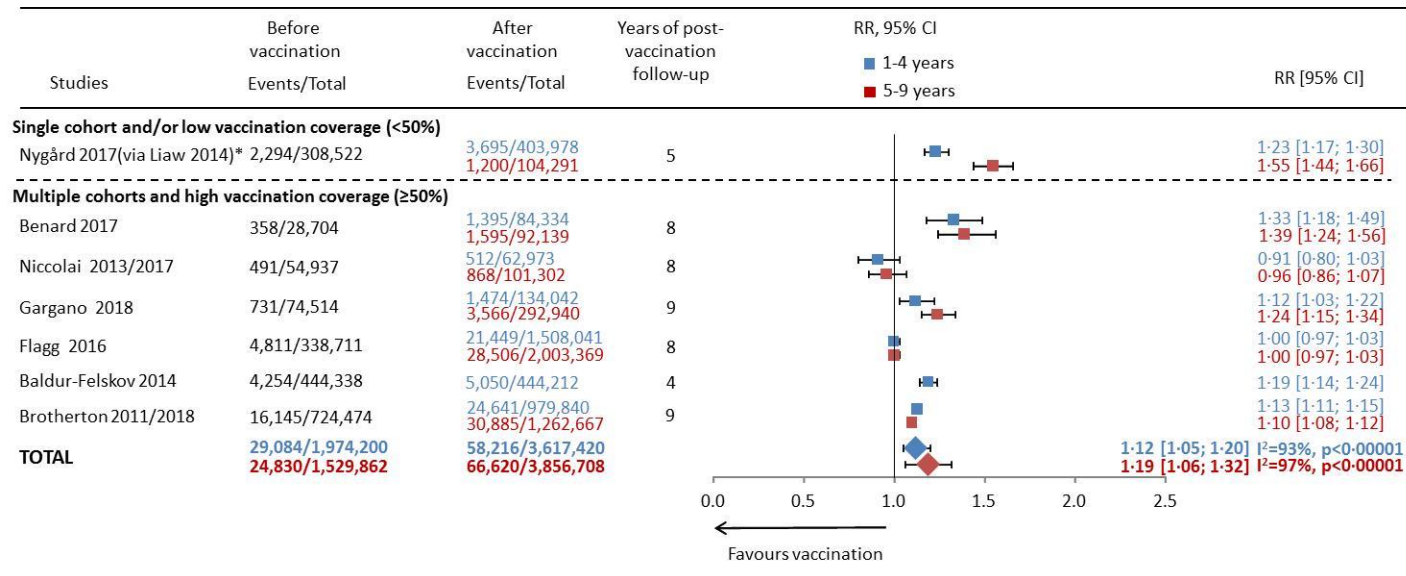

### D) Women aged 30-39 years old

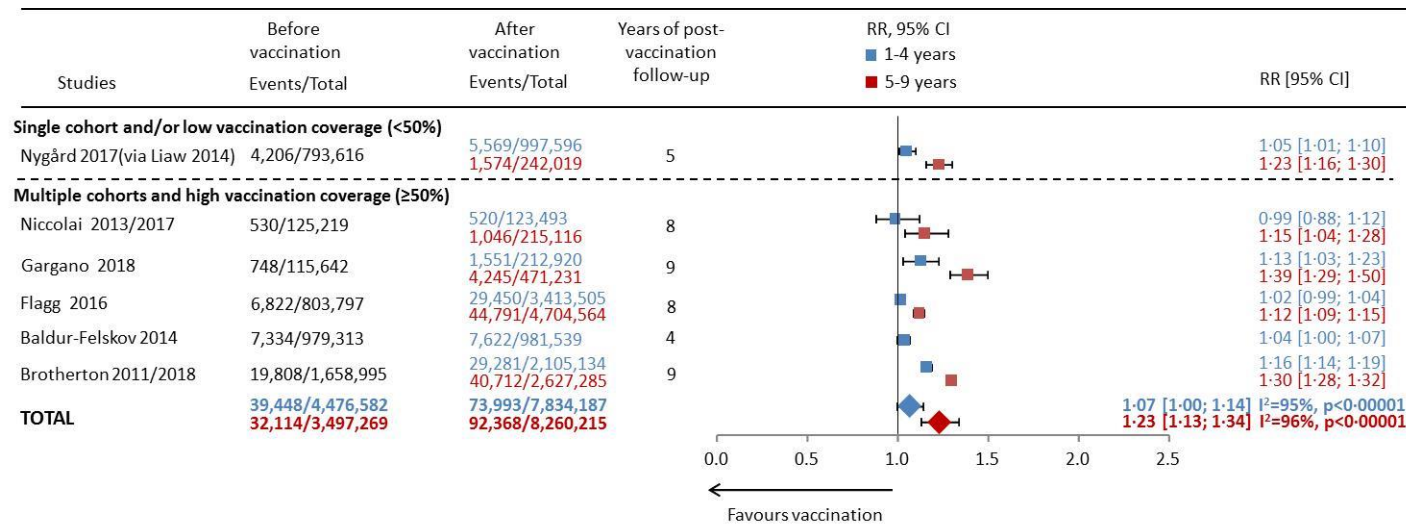

\* CIN2+ data from Norway were identified in the article by Liaw et al 2014 and were provided by Mari Nygård (personal communication)

**Figure S4. Sensitivity analysis: changes in anogenital warts comparing countries with multi-cohort and single-cohort vaccination, restricted to countries with high routine vaccination coverage.**

**A) Girls and Women**

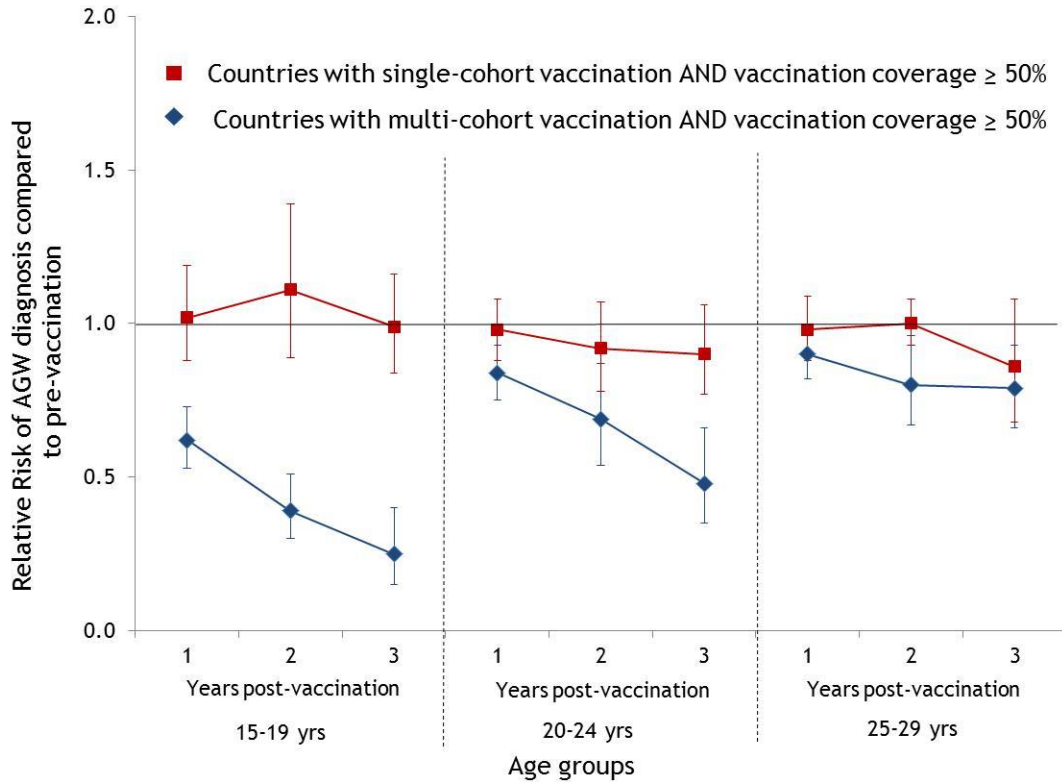

**B) Boys and Men**

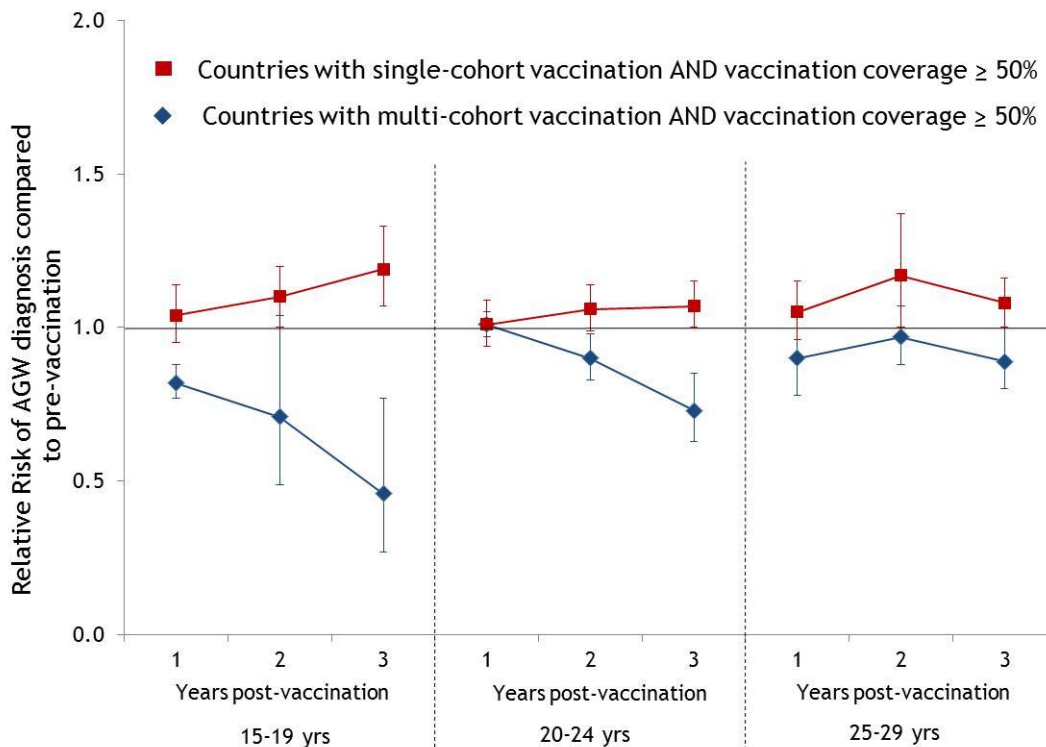

■ Canada-Manitoba (Kliwer 2012/Thompson 2016), Canada-Ontario (Guerra 2016), Italy (Cocchio 2017)  
◆ Australia (Ali 2013/Chow 2015, Smith 2015, Harrison 2014, Liu 2014); Denmark (Baandrup 2013/Bollerup 2016); New Zealand (Oliphant 2011/2017), Canada-Québec (Steben 2018)  
 Data were available for more than 2 studies per age group only for the first 3 years after the introduction of HPV vaccination.
